# Supplementary material for: Synthesis of α-pyrones via gold-catalyzed cycloisomerization/[2 + 1] cycloaddition/rearrangement of enyne-amides and sulfur ylides
Source: Royal Society of Chemistry journal article supplement (doi:10.1039/d2qo01388f), 2023-01-01

## *Supporting Information*

### **Synthesis of $\alpha$ -pyrones via gold-catalyzed cycloisomerization/[2+1] cycloaddition/rearrangement of enyne-amides and sulfur ylides**

Jinhang Yu,<sup>†</sup> Xinyuan Wang,<sup>†</sup> Mengjiao Xu, Bei Zhang, Zuping Xiong, Hui Mao,  
Xin Lv,<sup>\*</sup> and Liejin Zhou<sup>\*</sup>

*Key Laboratory of the Ministry of Education for Advanced Catalysis Materials, Department of Chemistry,  
Zhejiang Normal University, 688 Yingbin Road, Jinhua 321004, P. R. China.*

*E-mail: lvxin@zjnu.cn, ljzhou@zjnu.cn*

## **Table of Contents**

|                                                           |            |
|-----------------------------------------------------------|------------|
| <b>1. General Information</b>                             | <b>S2</b>  |
| <b>2. Some Optimization of Reaction Conditions</b>        | <b>S3</b>  |
| <b>3. General Procedure for the Synthesis of Products</b> | <b>S4</b>  |
| <b>4. General Procedure for the Transformations of 3a</b> | <b>S5</b>  |
| <b>5. Reference</b>                                       | <b>S6</b>  |
| <b>6. Crystal Structures of 3a, 3e, 8 and 9</b>           | <b>S7</b>  |
| <b>7. Characterization of Products</b>                    | <b>S12</b> |
| <b>8. Spectra of the New Compounds</b>                    | <b>S23</b> |

## 1. General Information

Commercially available materials purchased from Bidepharm or Energy Chemical was used as received. DCE was newly distilled over CaH<sub>2</sub>, THF was distilled over sodium, and CHCl<sub>3</sub> was newly distilled over CaH<sub>2</sub>. Other solvents were dried over 4Å molecular sieve prior use. Unless otherwise specified, all reactions were carried out under an atmosphere of nitrogen in 10 mL Schlenk tube.

<sup>1</sup>H NMR, <sup>13</sup>C NMR spectra were measured at 400 MHz and 151 MHz in CDCl<sub>3</sub>. Data for <sup>1</sup>H NMR spectra are reported as follows: chemical shift (ppm, referenced to TMS; s = singlet, d = doublet, t = triplet, dd = doublet of doublets, dt = doublet of triplets, m = multiplet), coupling constant (Hz), and integration. Data for <sup>13</sup>C NMR are reported in terms of chemical shift (ppm) relative to residual solvent peak (CDCl<sub>3</sub>: 77.16 ppm). High-resolution mass spectrometry (HRMS) analysis was carried out using a TOF MS instrument with ESI or APCI source.

Reactions were monitored by thin layer chromatography (TLC) using silicycle pre-coated silica gel plates. Flash column chromatography was performed on silica gel 60 (particle size 200-300 mesh ASTM, purchased from Yantai, China) and eluted with petroleum ether/ethyl acetate. Ynamides were prepared according to previous literature procedures.<sup>[1,2]</sup> Various sulfur ylide salts were prepared from dimethyl sulfide and the different substituents of bromoacetophenone according to the literature.<sup>[3]</sup>

## 2. Some Optimization of Reaction Conditions

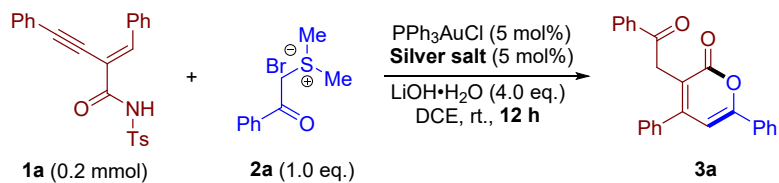

**Silver Salt:**

1. **AgSbF<sub>6</sub>**, 54%;
2. **AgClO<sub>4</sub>**, 53%;
3. **AgOTf**, 61%;
4. **AgNTf<sub>2</sub>**, 29%

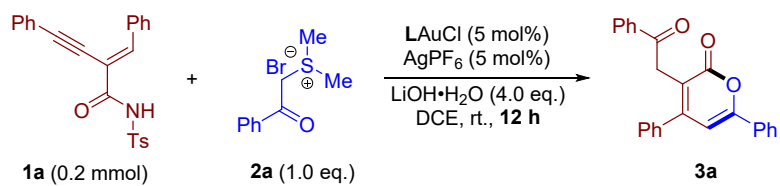

**Ligand**

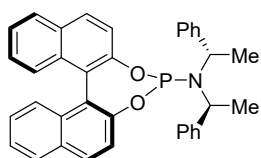

**L1**, 68%

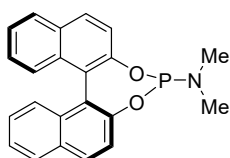

**L2**, 59%

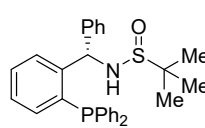

**L3**, 65%

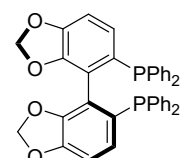

**L4**, 46%

### 3. General Procedure for the Synthesis of Products

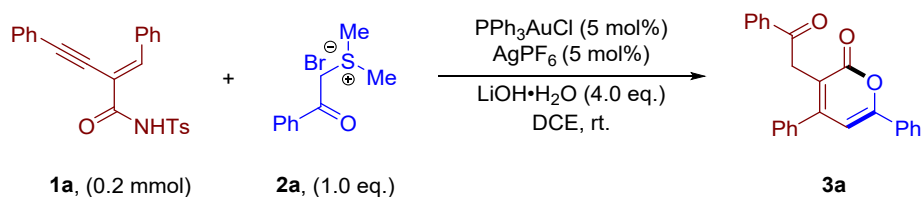

In a dried and nitrogen filled Schlenk flask, a mixture of PPh<sub>3</sub>AuCl (5.0 mg, 0.01 mmol, 5 mol %), AgPF<sub>6</sub> (2.5 mg, 0.01 mmol, 5 mol %) in DCE (2 mL) was stirred at room temperature under for 15 mins to generate the gold catalyst. Ynamide **1a** (80.2 mg, 0.2 mmol) was added to the above catalyst solution under nitrogen, stirred for 0.5 h. Then sulfur ylide salt **2** (52.0 mg, 0.2 mmol) and LiOH · H<sub>2</sub>O (33.6 mg, 0.8 mmol) were quickly added to the system. The resulting solution was stirred at room temperature for another 12 hours. When the reaction was completed (monitored by TLC), the mixture was directly concentrated under reduced pressure. The resulting crude residue was purified via column chromatography on silica gel, to give the pure products **3a** in 69% yield (50.5 mg).

Products **3** or **4** were performed in the above procedure.

#### 4. General Procedure for the Transformations of **3a**

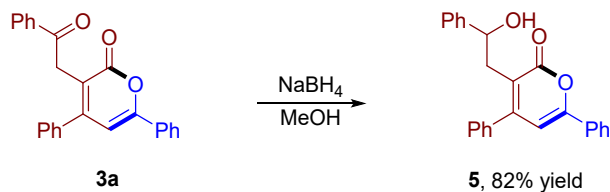

To a dry Schlenk tube with a magnetic stir bar, was added **3a** (36.6 mg, 0.10 mmol) and ultra-dry methanol (1.5 mL). Then, NaBH<sub>4</sub> (7.6 mg, 0.2 mmol) was added to the solution. The mixture was stirred at room temperature for 3 h until the **3a** was complete consumed (monitored by TLC). The mixture was directly concentrated under reduced pressure. The resulting crude residue was purified via column chromatography on silica gel (petroleum ether/ethyl acetate = 8:1) to afford the desired product **5** with 82% (30.2 mg) yield.

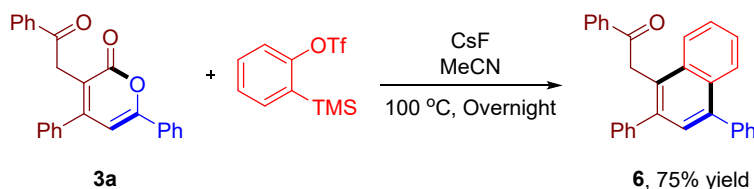

To a dry sealed tube with a magnetic stir bar, was added **3a** (36.6 mg, 0.10 mmol), CsF (19 mg, 0.12 mmol) and anhydrous MeCN (1.0 mL). Immediately afterwards, 2-(trimethylsilyl)phenyl trifluoromethanesulfonate (1.2 eq., 30  $\mu$ L) was slowly added to the above system. After that, the reaction was stirred overnight at 100 °C. After the reaction mixture was cooled to room temperature. The mixture was directly concentrated under reduced pressure. The resulting crude residue was purified via column chromatography on silica gel (petroleum ether/ethyl acetate = 100:1) to afford the desired product **6** with 75% (29.9 mg) yield.

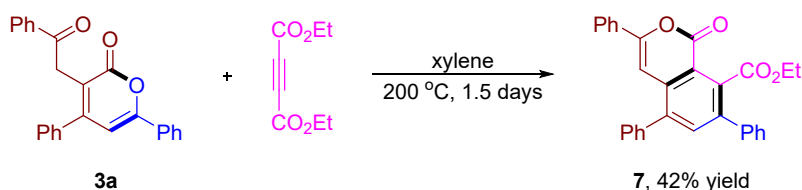

To a dry sealed tube with a magnetic stir bar, a mixture of **3a** (36.6 mg, 0.10 mmol), diethyl but-2-ynedioate (85.0 mg, 0.50 mmol) in xylene (2 mL) was stirred at 200 °C for 1.5 days. After the reaction mixture was cooled to room temperature. The mixture was directly concentrated under reduced pressure. The resulting crude residue was purified via column chromatography on silica gel (petroleum ether/ethyl acetate = 18:1) to afford the desired product **7** with 42% (18.7 mg) yield.

## 5. Reference

- [1] R. Rossi, F. Bellina, C. Bechini, L. Mannina, P. Vergamini, *Tetrahedron* **1998**, *54*, 135.
- [2] Y. Luo, K.-M. Qiu, X. Lu, K. Liu, J. Fu, H.-L. Zhu, *Bioorg. Med. Chem.* **2011**, *19*, 4730.
- [3] P. Y. Ushakov, E. A. Khatuntseva, Y. V. Nelyubina, A. A. Tabolin, S. L. Ioffe, A. Y. Sukhorukov, *Adv. Synth. Catal.* **2019**, *361*, 5322.

## 6. Crystal structures of 3a, 3e, 8 and 9

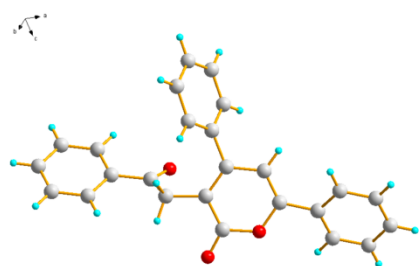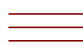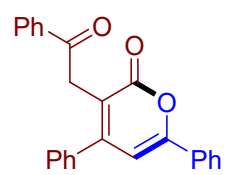

**3a** (CCDC: 2117411)

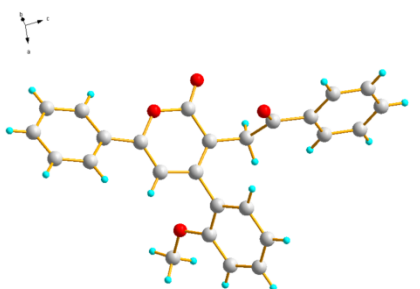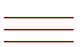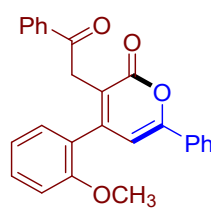

**3e** (CCDC: 2111301)

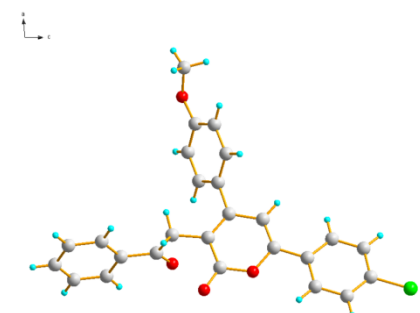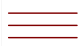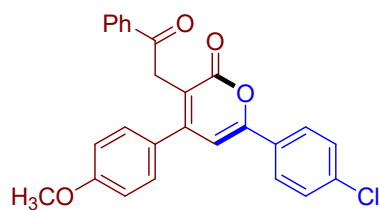

**8** (CCDC: 2111107)

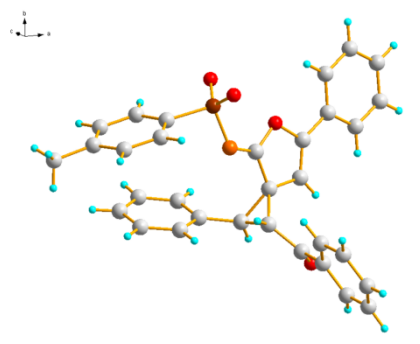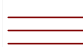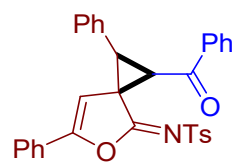

**9** (CCDC: 2111140)

**Crystal data and structure refinement for 3a.**

|                                             |                                                           |
|---------------------------------------------|-----------------------------------------------------------|
| CCDC number                                 | 2117411                                                   |
| Identification code                         | <b>3a</b>                                                 |
| Empirical formula                           | C <sub>25</sub> H <sub>18</sub> O <sub>3</sub>            |
| Formula weight                              | 366.39                                                    |
| Temperature/K                               | 160.00                                                    |
| Crystal system                              | triclinic                                                 |
| Space group                                 | P-1                                                       |
| a/Å                                         | 9.8356(9)                                                 |
| b/Å                                         | 9.8517(9)                                                 |
| c/Å                                         | 11.1746(11)                                               |
| α/°                                         | 63.911(3)                                                 |
| β/°                                         | 75.454(3)                                                 |
| γ/°                                         | 86.025(3)                                                 |
| Volume/Å <sup>3</sup>                       | 940.24(15)                                                |
| Z                                           | 2                                                         |
| ρ <sub>calc</sub> /cm <sup>3</sup>          | 1.294                                                     |
| μ/mm <sup>-1</sup>                          | 0.084                                                     |
| F(000)                                      | 384.0                                                     |
| Crystal size/mm <sup>3</sup>                | 0.12 × 0.11 × 0.1                                         |
| Radiation                                   | MoKα (λ = 0.71073)                                        |
| 2θ range for data collection/°              | 4.68 to 54.962                                            |
| Index ranges                                | -12 ≤ h ≤ 12, -12 ≤ k ≤ 11, -14 ≤ l ≤ 14                  |
| Reflections collected                       | 19071                                                     |
| Independent reflections                     | 19071 [R <sub>int</sub> = ?, R <sub>sigma</sub> = 0.0545] |
| Data/restraints/parameters                  | 19071/0/254                                               |
| Goodness-of-fit on F <sup>2</sup>           | 1.045                                                     |
| Final R indexes [I ≥ 2σ (I)]                | R <sub>1</sub> = 0.0552, wR <sub>2</sub> = 0.1474         |
| Final R indexes [all data]                  | R <sub>1</sub> = 0.0775, wR <sub>2</sub> = 0.1652         |
| Largest diff. peak/hole / e Å <sup>-3</sup> | 0.17/-0.15                                                |



**Crystal data and structure refinement for 3e.**

|                                             |                                                               |
|---------------------------------------------|---------------------------------------------------------------|
| CCDC number                                 | 2111301                                                       |
| Identification code                         | <b>3e</b>                                                     |
| Empirical formula                           | C <sub>26</sub> H <sub>20</sub> O <sub>4</sub>                |
| Formula weight                              | 396.42                                                        |
| Temperature/K                               | 304.00                                                        |
| Crystal system                              | triclinic                                                     |
| Space group                                 | P-1                                                           |
| a/Å                                         | 9.5757(4)                                                     |
| b/Å                                         | 10.4391(5)                                                    |
| c/Å                                         | 11.0084(5)                                                    |
| α/°                                         | 103.768(2)                                                    |
| β/°                                         | 99.482(2)                                                     |
| γ/°                                         | 104.612(2)                                                    |
| Volume/Å <sup>3</sup>                       | 1004.22(8)                                                    |
| Z                                           | 2                                                             |
| ρ <sub>calc</sub> /cm <sup>3</sup>          | 1.311                                                         |
| μ/mm <sup>-1</sup>                          | 0.088                                                         |
| F(000)                                      | 416.0                                                         |
| Crystal size/mm <sup>3</sup>                | 0.12 × 0.11 × 0.1                                             |
| Radiation                                   | MoKα (λ = 0.71073)                                            |
| 2θ range for data collection/°              | 4.846 to 54.992                                               |
| Index ranges                                | -12 ≤ h ≤ 12, -13 ≤ k ≤ 13, -14 ≤ l ≤ 14                      |
| Reflections collected                       | 21021                                                         |
| Independent reflections                     | 4578 [R <sub>int</sub> = 0.0263, R <sub>sigma</sub> = 0.0200] |
| Data/restraints/parameters                  | 4578/0/272                                                    |
| Goodness-of-fit on F <sup>2</sup>           | 1.023                                                         |
| Final R indexes [I ≥ 2σ (I)]                | R <sub>1</sub> = 0.0412, wR <sub>2</sub> = 0.1013             |
| Final R indexes [all data]                  | R <sub>1</sub> = 0.0492, wR <sub>2</sub> = 0.1073             |
| Largest diff. peak/hole / e Å <sup>-3</sup> | 0.22/-0.14                                                    |

**Crystal data and structure refinement for 8.**

|                                             |                                                               |
|---------------------------------------------|---------------------------------------------------------------|
| CCDC number                                 | 2111107                                                       |
| Identification code                         | <b>8</b>                                                      |
| Empirical formula                           | C <sub>26</sub> H <sub>19</sub> ClO <sub>4</sub>              |
| Formula weight                              | 430.86                                                        |
| Temperature/K                               | 303.00                                                        |
| Crystal system                              | monoclinic                                                    |
| Space group                                 | P2 <sub>1</sub> /n                                            |
| a/Å                                         | 11.1283(5)                                                    |
| b/Å                                         | 8.4980(3)                                                     |
| c/Å                                         | 23.7973(10)                                                   |
| α/°                                         | 90                                                            |
| β/°                                         | 94.591(2)                                                     |
| γ/°                                         | 90                                                            |
| Volume/Å <sup>3</sup>                       | 2243.25(16)                                                   |
| Z                                           | 4                                                             |
| ρ <sub>calc</sub> /cm <sup>3</sup>          | 1.276                                                         |
| μ/mm <sup>-1</sup>                          | 0.200                                                         |
| F(000)                                      | 896.0                                                         |
| Crystal size/mm <sup>3</sup>                | 0.13 × 0.12 × 0.11                                            |
| Radiation                                   | MoKα (λ = 0.71073)                                            |
| 2θ range for data collection/°              | 5.092 to 54.976                                               |
| Index ranges                                | -14 ≤ h ≤ 14, -11 ≤ k ≤ 10, -30 ≤ l ≤ 30                      |
| Reflections collected                       | 34156                                                         |
| Independent reflections                     | 5107 [R <sub>int</sub> = 0.0404, R <sub>sigma</sub> = 0.0246] |
| Data/restraints/parameters                  | 5107/0/281                                                    |
| Goodness-of-fit on F <sup>2</sup>           | 1.026                                                         |
| Final R indexes [I ≥ 2σ (I)]                | R <sub>1</sub> = 0.0454, wR <sub>2</sub> = 0.1028             |
| Final R indexes [all data]                  | R <sub>1</sub> = 0.0687, wR <sub>2</sub> = 0.1179             |
| Largest diff. peak/hole / e Å <sup>-3</sup> | 0.13/-0.21                                                    |

**Crystal data and structure refinement for 9.**

|                                             |                                                               |
|---------------------------------------------|---------------------------------------------------------------|
| CCDC number                                 | 2111140                                                       |
| Identification code                         | <b>9</b>                                                      |
| Empirical formula                           | C <sub>32</sub> H <sub>25</sub> NO <sub>4</sub> S             |
| Formula weight                              | 519.59                                                        |
| Temperature/K                               | 160.15                                                        |
| Crystal system                              | monoclinic                                                    |
| Space group                                 | P2 <sub>1</sub> /c                                            |
| a/Å                                         | 12.3788(8)                                                    |
| b/Å                                         | 21.0408(11)                                                   |
| c/Å                                         | 10.8677(7)                                                    |
| α/°                                         | 90                                                            |
| β/°                                         | 106.544(2)                                                    |
| γ/°                                         | 90                                                            |
| Volume/Å <sup>3</sup>                       | 2713.4(3)                                                     |
| Z                                           | 4                                                             |
| ρ <sub>calc</sub> /g/cm <sup>3</sup>        | 1.272                                                         |
| μ/mm <sup>-1</sup>                          | 0.157                                                         |
| F(000)                                      | 1088.0                                                        |
| Crystal size/mm <sup>3</sup>                | 0.12 × 0.11 × 0.1                                             |
| Radiation                                   | MoKα (λ = 0.71073)                                            |
| 2θ range for data collection/°              | 4.814 to 54.964                                               |
| Index ranges                                | -15 ≤ h ≤ 16, -26 ≤ k ≤ 27, -13 ≤ l ≤ 14                      |
| Reflections collected                       | 25686                                                         |
| Independent reflections                     | 6192 [R <sub>int</sub> = 0.0488, R <sub>sigma</sub> = 0.0405] |
| Data/restraints/parameters                  | 6192/0/344                                                    |
| Goodness-of-fit on F <sup>2</sup>           | 1.026                                                         |
| Final R indexes [I ≥ 2σ (I)]                | R <sub>1</sub> = 0.0508, wR <sub>2</sub> = 0.1183             |
| Final R indexes [all data]                  | R <sub>1</sub> = 0.0864, wR <sub>2</sub> = 0.1401             |
| Largest diff. peak/hole / e Å <sup>-3</sup> | 0.17/-0.27                                                    |

## 7. Characterization of Products

### 3-(2-Oxo-2-phenylethyl)-4,6-diphenyl-2H-pyran-2-one (3a)

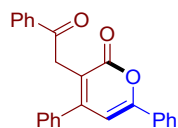

Isolated in 69% yield (50.5 mg) as yellow solid, mp 165.2 – 168.2 °C.

<sup>1</sup>H NMR (400 MHz, CDCl<sub>3</sub>) δ 7.97 (d, *J* = 7.5 Hz, 2H), 7.91 – 7.80 (m, 2H), 7.57 (t, *J* = 7.3 Hz, 1H), 7.50 – 7.34 (m, 10H), 6.73 (s, 1H), 4.17 (s, 2H). <sup>13</sup>C NMR (151 MHz, CDCl<sub>3</sub>) δ 196.98, 163.37, 157.89, 154.96, 137.60, 136.76, 133.40, 131.55, 130.76, 129.36, 129.04, 129.02, 128.70, 128.43, 127.54, 125.68, 118.14, 104.63, 38.43. HRMS (ESI) calcd. for C<sub>25</sub>H<sub>19</sub>O<sub>3</sub> [M+H<sup>+</sup>]: 367.1329, found: 367.1328.

### 3-(2-Oxo-2-phenylethyl)-6-phenyl-4-(*o*-tolyl)-2H-pyran-2-one (3b)

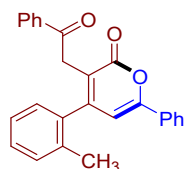

Isolated in 73% yield (55.5 mg) as yellow solid, mp 145.5 – 147.1 °C.

<sup>1</sup>H NMR (400 MHz, CDCl<sub>3</sub>) δ 7.91 – 7.80 (m, 4H), 7.55 – 7.49 (m, 1H), 7.48 – 7.37 (m, 5H), 7.31 – 7.26 (m, 2H), 7.23 – 7.13 (m, 2H), 6.61 (s, 1H), 4.15 (d, *J* = 17.1 Hz, 1H), 3.83 (d, *J* = 17.1 Hz, 1H), 2.26 (s, 3H). <sup>13</sup>C NMR (151 MHz, CDCl<sub>3</sub>) δ 196.15, 163.23, 157.82, 155.49, 136.98, 136.81, 134.69, 133.24, 131.52, 130.77, 130.75, 129.04, 128.61, 128.29, 127.53, 126.28, 125.66, 119.17, 104.47, 37.91, 19.83. HRMS (ESI) calcd. for C<sub>26</sub>H<sub>21</sub>O<sub>3</sub> [M+H<sup>+</sup>]: 381.1485, found: 381.1463.

### 3-(2-Oxo-2-phenylethyl)-6-phenyl-4-(*m*-tolyl)-2H-pyran-2-one (3c)

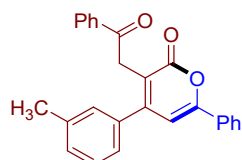

Isolated in 60% yield (45.6 mg) as yellow solid, mp 165.4 – 168.6 °C.

<sup>1</sup>H NMR (400 MHz, CDCl<sub>3</sub>) δ 7.96 (d, *J* = 7.5 Hz, 2H), 7.90 – 7.79 (m, 2H), 7.56 (t, *J* = 7.4 Hz, 1H), 7.49 – 7.38 (m, 5H), 7.29 (t, *J* = 7.7 Hz, 1H), 7.24 – 7.12 (m, 3H), 6.72 (s, 1H), 4.16 (s, 2H), 2.34 (s, 3H). <sup>13</sup>C NMR (151 MHz, CDCl<sub>3</sub>) δ 197.01, 163.39, 157.79, 155.07, 138.85, 137.58, 136.85, 133.32, 131.60, 130.70, 130.07, 129.02, 128.88, 128.68, 128.38, 128.09, 125.67, 124.60, 118.09, 104.68, 38.44, 21.53. HRMS (ESI) calcd. for C<sub>26</sub>H<sub>21</sub>O<sub>3</sub> [M+H<sup>+</sup>]: 381.1485, found: 381.1507.

### 3-(2-Oxo-2-phenylethyl)-6-phenyl-4-(*p*-tolyl)-2H-pyran-2-one (3d)

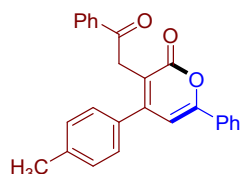

Isolated in 67% yield (50.9 mg) as yellow solid, mp 157.7 – 159.1 °C.

<sup>1</sup>H NMR (400 MHz, CDCl<sub>3</sub>) δ 7.98 (d, *J* = 7.3 Hz, 2H), 7.89 – 7.80 (m, 2H), 7.56 (t, *J* = 7.4 Hz, 1H), 7.49 – 7.39 (m, 5H), 7.30 – 7.18 (m, 4H), 6.72 (s, 1H), 4.18 (s, 2H), 2.37 (s, 3H). <sup>13</sup>C NMR (151 MHz, CDCl<sub>3</sub>) δ 197.04, 163.42, 157.75, 154.97, 139.49, 136.83, 134.70, 133.34, 131.63, 130.67, 129.66, 129.01, 128.68, 128.42, 127.50, 125.66, 117.93, 104.76, 38.52, 21.41. HRMS (ESI) calcd. for C<sub>26</sub>H<sub>21</sub>O<sub>3</sub> [M+H<sup>+</sup>]: 381.1485, found: 381.1473.

#### 4-(2-Methoxyphenyl)-3-(2-oxo-2-phenylethyl)-6-phenyl-2H-pyran-2-one (3e)

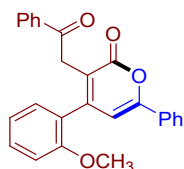

Isolated in 56% yield (44.4 mg) as yellow solid, mp 138.0 – 142.5 °C.

<sup>1</sup>H NMR (600 MHz, CDCl<sub>3</sub>) δ 7.92 (d, *J* = 7.6 Hz, 2H), 7.84 (d, *J* = 4.5 Hz, 2H), 7.54 (t, *J* = 7.2 Hz, 1H), 7.49 – 7.40 (m, 5H), 7.38 (t, *J* = 7.7 Hz, 1H), 7.23 (d, *J* = 7.2 Hz, 1H), 7.02 – 6.91 (m, 2H), 6.68 (s, 1H), 4.28 (d, *J* = 16.6 Hz, 1H), 3.84 (d, *J* = 16.7 Hz, 1H), 3.75 (s, 3H). <sup>13</sup>C NMR (151 MHz, CDCl<sub>3</sub>) δ 196.43, 163.40, 157.26, 155.86, 152.33, 136.94, 133.14, 131.78, 130.83, 130.48, 129.50, 128.94, 128.61, 128.28, 126.03, 125.64, 121.02, 119.60, 111.27, 105.47, 55.62, 38.60. HRMS (ESI) calcd. for C<sub>26</sub>H<sub>21</sub>O<sub>4</sub> [M+H<sup>+</sup>]: 397.1434, found: 397.1408.

#### 4-(3-Methoxyphenyl)-3-(2-oxo-2-phenylethyl)-6-phenyl-2H-pyran-2-one (3f)

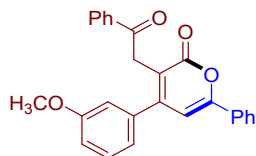

Isolated in 61% yield (48.3mg) as yellow solid, mp 208.5 – 210.0 °C.

<sup>1</sup>H NMR (400 MHz, CDCl<sub>3</sub>) δ 7.97 (d, *J* = 7.5 Hz, 2H), 7.90 – 7.80 (m, 2H), 7.56 (t, *J* = 7.3 Hz, 1H), 7.50 – 7.39 (m, 5H), 7.32 (t, *J* = 7.8 Hz, 1H), 6.99 – 6.88 (m, 3H), 6.73 (s, 1H), 4.17 (s, 2H), 3.73 (s, 3H). <sup>13</sup>C NMR (151 MHz, CDCl<sub>3</sub>) δ 197.03, 163.33, 159.89, 157.90, 154.85, 138.92, 136.79, 133.39, 131.55, 130.75, 130.18, 129.04, 128.71, 128.41, 125.68, 119.72, 118.16, 115.24, 112.74, 104.52, 55.42, 38.50. HRMS (ESI) calcd. for C<sub>26</sub>H<sub>21</sub>O<sub>4</sub> [M+H<sup>+</sup>]: 397.1434, found: 397.1409.

#### 4-(4-Methoxyphenyl)-3-(2-oxo-2-phenylethyl)-6-phenyl-2H-pyran-2-one (3g)

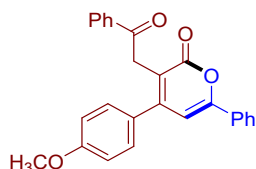

Isolated in 55% yield (43.6 mg) as yellow solid, mp 187.3 – 188.9 °C.

<sup>1</sup>H NMR (400 MHz, CDCl<sub>3</sub>) δ 7.99 (d, *J* = 7.3 Hz, 2H), 7.92 – 7.78 (m, 2H), 7.57 (t, *J* = 6.7 Hz, 1H), 7.52 – 7.39 (m, 5H), 7.33 (d, *J* = 8.1 Hz, 2H), 6.93 (d, *J* = 8.1 Hz, 2H), 6.73 (s, 1H), 4.19 (s, 2H), 3.82

(s, 3H).  $^{13}\text{C}$  NMR (151 MHz,  $\text{CDCl}_3$ )  $\delta$  197.21, 163.49, 160.51, 157.69, 154.63, 136.86, 133.38, 131.67, 130.67, 129.84, 129.12, 129.02, 128.71, 128.45, 125.67, 117.69, 114.41, 104.83, 55.50, 38.62. HRMS (ESI) calcd. for  $\text{C}_{26}\text{H}_{21}\text{O}_4$  [ $\text{M}+\text{H}^+$ ]: 397.1434, found: 397.1427.

#### 4-(4-Isopropylphenyl)-3-(2-oxo-2-phenylethyl)-6-phenyl-2H-pyran-2-one (3h)

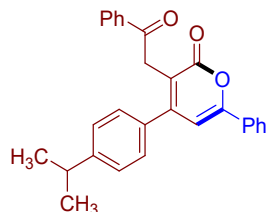

Isolated in 58% yield (47.3 mg) as yellow solid, mp 168.4 – 168.9 °C.

$^1\text{H}$  NMR (400 MHz,  $\text{CDCl}_3$ )  $\delta$  7.98 (d,  $J$  = 7.6 Hz, 2H), 7.91 – 7.77 (m, 2H), 7.56 (t,  $J$  = 7.1 Hz, 1H), 7.51 – 7.38 (m, 5H), 7.35 – 7.20 (m, 4H), 6.74 (s, 1H), 4.19 (s, 2H), 3.06 – 2.81 (m, 1H), 1.26 (s, 3H), 1.24 (s, 3H).  $^{13}\text{C}$  NMR (151 MHz,  $\text{CDCl}_3$ )  $\delta$  197.10, 163.46, 157.69, 154.95, 150.34, 136.85, 135.00, 133.34, 131.63, 130.65, 129.00, 128.67, 128.45, 127.62, 127.07, 125.64, 117.93, 104.81, 38.51, 34.07, 23.95. HRMS (ESI) calcd. for  $\text{C}_{28}\text{H}_{25}\text{O}_3$  [ $\text{M}+\text{H}^+$ ]: 409.1798, found: 409.1776.

#### 4-(4-Chlorophenyl)-3-(2-oxo-2-phenylethyl)-6-phenyl-2H-pyran-2-one (3i)

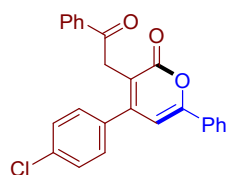

Isolated in 49% yield (39.2 mg) as yellow solid, mp 168.1 – 168.9 °C.

$^1\text{H}$  NMR (400 MHz,  $\text{CDCl}_3$ )  $\delta$  7.97 (d,  $J$  = 7.5 Hz, 2H), 7.90 – 7.80 (m, 2H), 7.58 (t,  $J$  = 7.4 Hz, 1H), 7.51 – 7.43 (m, 5H), 7.40 (d,  $J$  = 8.4 Hz, 2H), 7.33 (d,  $J$  = 8.4 Hz, 2H), 6.68 (s, 1H), 4.14 (s, 2H).  $^{13}\text{C}$  NMR (151 MHz,  $\text{CDCl}_3$ )  $\delta$  196.88, 163.11, 158.16, 153.80, 136.65, 135.98, 135.60, 133.55, 131.41, 130.91, 129.32, 129.08, 128.98, 128.77, 128.44, 125.71, 118.37, 104.21, 38.35. HRMS (ESI) calcd. for  $\text{C}_{25}\text{H}_{18}\text{ClO}_3$  [ $\text{M}+\text{H}^+$ ]: 401.0939, found: 401.0964.

#### 3-(2-Oxo-2-phenylethyl)-6-phenyl-4-(4-(trifluoromethyl)phenyl)-2H-pyran-2-one (3j)

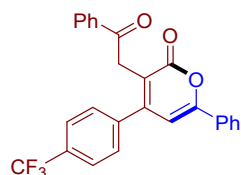

Isolated in 40% yield (34.7 mg) as yellow solid, mp 168.3 – 169.3 °C.

$^1\text{H}$  NMR (400 MHz,  $\text{CDCl}_3$ )  $\delta$  8.01 – 7.94 (m, 2H), 7.89 – 7.82 (m, 2H), 7.69 (d,  $J$  = 8.1 Hz, 2H), 7.58 (t,  $J$  = 7.4 Hz, 1H), 7.53 (d,  $J$  = 8.0 Hz, 2H), 7.49 – 7.43 (m, 5H), 6.69 (s, 1H), 4.12 (s, 2H).  $^{13}\text{C}$  NMR (151 MHz,  $\text{CDCl}_3$ )  $\delta$  196.71, 162.94, 158.41, 153.56, 141.15, 136.56, 133.63, 131.49 (q,  $J$  = 32.9 Hz), 131.29, 131.03, 129.13, 128.79, 128.45, 128.06, 126.07 (q,  $J$  = 3.7 Hz), 125.73, 123.86 (q,  $J$  = 272.4 Hz), 118.70, 103.91, 38.21. HRMS (ESI) calcd. for  $\text{C}_{26}\text{H}_{18}\text{F}_3\text{O}_3$  [ $\text{M}+\text{H}^+$ ]: 435.1203, found: 435.1184.

#### 4-(4-Nitrophenyl)-3-(2-oxo-2-phenylethyl)-6-phenyl-2H-pyran-2-one (3k)

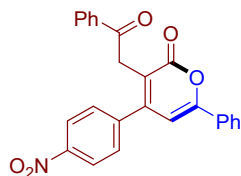

Isolated in 28% yield (23.0 mg) as brown solid, mp 222.5 – 224.3 °C.

$^1\text{H}$  NMR (400 MHz,  $\text{CDCl}_3$ )  $\delta$  8.32 – 8.26 (m, 2H), 8.00 – 7.93 (m, 2H), 7.89 – 7.83 (m, 2H), 7.63 – 7.55 (m, 3H), 7.52 – 7.43 (m, 5H), 6.68 (s, 1H), 4.11 (s, 2H).  $^{13}\text{C}$  NMR (151 MHz,  $\text{CDCl}_3$ )  $\delta$  196.52, 162.70, 158.74, 152.78, 148.39, 143.89, 136.41, 133.78, 131.22, 131.13, 129.18, 128.86, 128.78, 128.46, 125.78, 124.32, 118.88, 103.40, 38.14. HRMS (ESI) calcd. for  $\text{C}_{25}\text{H}_{18}\text{NO}_5$  [ $\text{M}+\text{H}^+$ ]: 412.1179, found: 412.1162.

#### 3-(2-Oxo-2-phenylethyl)-6-phenyl-4-(thiophen-2-yl)-2H-pyran-2-one (3l)

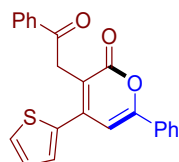

Isolated in 52% yield (38.8 mg) as brown solid, mp 139.2 – 141.3 °C.

$^1\text{H}$  NMR (400 MHz,  $\text{CDCl}_3$ )  $\delta$  8.05 (d,  $J = 7.4$  Hz, 2H), 7.92 – 7.80 (m, 2H), 7.60 (t,  $J = 7.4$  Hz, 1H), 7.55 – 7.39 (m, 6H), 7.26 – 7.23 (m, 1H), 7.13 – 7.03 (m, 1H), 6.85 (s, 1H), 4.45 (s, 2H).  $^{13}\text{C}$  NMR (151 MHz,  $\text{CDCl}_3$ )  $\delta$  196.60, 163.40, 157.72, 155.83, 147.19, 138.41, 136.72, 133.51, 131.49, 130.85, 129.06, 129.03, 128.79, 128.53, 128.10, 125.74, 117.36, 104.41, 39.01. HRMS (ESI) calcd. for  $\text{C}_{23}\text{H}_{17}\text{O}_3\text{S}$  [ $\text{M}+\text{H}^+$ ]: 373.0893, found: 373.0875.

#### 4-(Naphthalen-1-yl)-3-(2-oxo-2-phenylethyl)-6-phenyl-2H-pyran-2-one (3m)

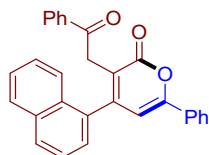

Isolated in 42% yield (35.0 mg) as yellow solid, mp 74.2 – 75.9 °C.

$^1\text{H}$  NMR (400 MHz,  $\text{CDCl}_3$ )  $\delta$  7.94 – 7.87 (m, 2H), 7.86 – 7.82 (m, 2H), 7.82 – 7.75 (m, 3H), 7.57 – 7.50 (m, 2H), 7.49 – 7.40 (m, 6H), 7.39 – 7.32 (m, 2H), 6.73 (s, 1H), 4.22 (d,  $J = 17.1$  Hz, 1H), 3.77 (d,  $J = 17.1$  Hz, 1H).  $^{13}\text{C}$  NMR (151 MHz,  $\text{CDCl}_3$ )  $\delta$  196.33, 163.17, 157.66, 154.33, 136.72, 134.76, 133.77, 133.22, 131.48, 130.79, 130.05, 129.47, 129.05, 128.74, 128.56, 128.27, 127.20, 126.69, 125.73, 125.58, 125.49, 125.22, 120.22, 105.30, 38.34. HRMS (ESI) calcd. for  $\text{C}_{29}\text{H}_{21}\text{O}_3$  [ $\text{M}+\text{H}^+$ ]: 417.1485, found: 417.1472.

#### 4-(Naphthalen-2-yl)-3-(2-oxo-2-phenylethyl)-6-phenyl-2H-pyran-2-one (3n)

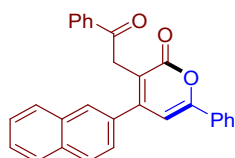

Isolated in 41% yield (34.1 mg) as yellow solid, mp 181.7 – 183.6 °C.

<sup>1</sup>H NMR (400 MHz, CDCl<sub>3</sub>) δ 7.98 – 7.92 (m, 2H), 7.92 – 7.84 (m, 5H), 7.84 – 7.78 (m, 1H), 7.57 – 7.49 (m, 3H), 7.49 – 7.39 (m, 6H), 6.83 (s, 1H), 4.21 (s, 2H). <sup>13</sup>C NMR (151 MHz, CDCl<sub>3</sub>) δ 197.07, 163.38, 157.96, 154.98, 136.83, 134.99, 133.39, 133.09, 131.60, 130.79, 129.07, 128.93, 128.70, 128.49, 128.42, 127.93, 127.25, 127.10, 127.05, 125.74, 124.98, 118.42, 104.74, 38.55. HRMS (ESI) calcd. for C<sub>29</sub>H<sub>21</sub>O<sub>3</sub> [M+H<sup>+</sup>]: 417.1485, found: 417.1455.

### 3-(2-Oxo-2-(*p*-tolyl)ethyl)-4,6-diphenyl-2H-pyran-2-one (3o)

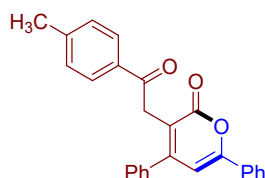

Isolated in 54% yield (41.1 mg) as yellow solid, mp 155.7 – 157.3 °C.

<sup>1</sup>H NMR (400 MHz, CDCl<sub>3</sub>) δ 7.97 – 7.76 (m, 4H), 7.52 – 7.31 (m, 8H), 7.30 – 7.17 (m, 2H), 6.72 (s, 1H), 4.14 (s, 2H), 2.40 (s, 3H). <sup>13</sup>C NMR (151 MHz, CDCl<sub>3</sub>) δ 196.52, 163.36, 157.80, 154.82, 144.19, 137.63, 134.28, 131.57, 130.70, 129.35, 129.30, 129.01, 128.97, 128.53, 127.54, 125.65, 118.30, 104.62, 38.30, 21.80. HRMS (ESI) calcd. for C<sub>26</sub>H<sub>21</sub>O<sub>3</sub> [M+H<sup>+</sup>]: 381.1485, found: 381.1456.

### 3-(2-(4-Methoxyphenyl)-2-oxoethyl)-4,6-diphenyl-2H-pyran-2-one (3p)

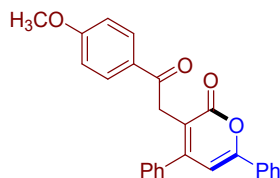

Isolated in 60% yield (47.5 mg) as yellow solid, mp 158.2 – 160.5 °C.

<sup>1</sup>H NMR (400 MHz, CDCl<sub>3</sub>) δ 7.95 (d, *J* = 8.8 Hz, 2H), 7.89 – 7.79 (m, 2H), 7.50 – 7.33 (m, 8H), 6.91 (d, *J* = 8.8 Hz, 2H), 6.72 (s, 1H), 4.11 (s, 2H), 3.85 (s, 3H). <sup>13</sup>C NMR (151 MHz, CDCl<sub>3</sub>) δ 195.39, 163.71, 163.37, 157.72, 154.75, 137.61, 131.55, 130.69, 130.66, 129.79, 129.27, 128.98, 128.94, 127.56, 125.62, 118.38, 113.79, 104.62, 55.58, 38.02. HRMS (ESI) calcd. for C<sub>26</sub>H<sub>21</sub>O<sub>4</sub> [M+H<sup>+</sup>]: 397.1434, found: 397.1395.

### 3-(2-(4-Bromophenyl)-2-oxoethyl)-4,6-diphenyl-2H-pyran-2-one (3q)

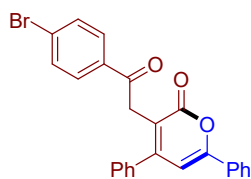

Isolated in 48% yield (42.6 mg) as yellow solid, mp 98.8 – 101.0 °C.



$^1\text{H}$  NMR (400 MHz,  $\text{CDCl}_3$ )  $\delta$  7.92 – 7.75 (m, 4H), 7.59 (d,  $J = 8.3$  Hz, 2H), 7.50 – 7.40 (m, 6H), 7.39 – 7.31 (m, 2H), 6.73 (s, 1H), 4.11 (s, 2H).  $^{13}\text{C}$  NMR (151 MHz,  $\text{CDCl}_3$ )  $\delta$  196.08, 163.31, 158.03, 155.11, 137.51, 135.51, 132.02, 131.47, 130.83, 129.95, 129.44, 129.06, 128.59, 127.50, 125.70, 117.82, 104.60, 38.31. HRMS (ESI) calcd. for  $\text{C}_{25}\text{H}_{18}\text{BrO}_3$  [ $\text{M}+\text{H}^+$ ]: 445.0434, found: 445.0392.

### 3-(2-Oxo-2-(4-(trifluoromethyl)phenyl)ethyl)-4,6-diphenyl-2H-pyran-2-one (3r)

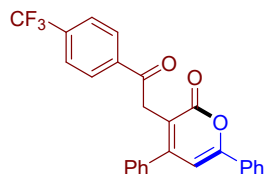

Isolated in 50% yield (43.4 mg) as yellow solid, mp 60.9 – 62.8 °C.

$^1\text{H}$  NMR (400 MHz,  $\text{CDCl}_3$ )  $\delta$  8.07 (d,  $J = 8.1$  Hz, 2H), 7.90 – 7.82 (m, 2H), 7.72 (d,  $J = 8.2$  Hz, 2H), 7.48 – 7.41 (m, 6H), 7.40 – 7.35 (m, 2H), 6.75 (s, 1H), 4.16 (s, 2H).  $^{13}\text{C}$  NMR (151 MHz,  $\text{CDCl}_3$ )  $\delta$  196.28, 163.29, 158.14, 155.28, 139.50, 137.45, 134.64 (q,  $J = 32.8$  Hz), 131.42, 130.90, 129.51, 129.11, 129.08, 128.75, 127.47, 125.80 (q,  $J = 3.7$  Hz), 125.71, 123.70 (q,  $J = 272.7$  Hz), 117.59, 104.58, 38.62. HRMS (ESI) calcd. for  $\text{C}_{26}\text{H}_{18}\text{F}_3\text{O}_3$  [ $\text{M}+\text{H}^+$ ]: 435.1203, found: 435.1189.

### 3-(2-Oxoethyl)-4,6-diphenyl-2H-pyran-2-one (3s)

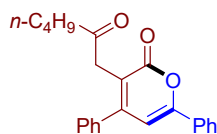

Isolated in 47% yield (32.5 mg) as yellow solid, mp 51.5 – 53.1 °C.

$^1\text{H}$  NMR (400 MHz,  $\text{CDCl}_3$ )  $\delta$  7.87 – 7.79 (m, 2H), 7.50 – 7.40 (m, 6H), 7.39 – 7.32 (m, 2H), 6.69 (s, 1H), 3.56 (s, 2H), 2.53 (t,  $J = 7.4$  Hz, 2H), 1.66 – 1.53 (m, 2H), 1.36 – 1.26 (m, 2H), 0.90 (t,  $J = 7.3$  Hz, 3H).  $^{13}\text{C}$  NMR (151 MHz,  $\text{CDCl}_3$ )  $\delta$  208.06, 163.39, 157.73, 154.75, 137.58, 131.51, 130.75, 129.35, 129.03, 128.95, 127.58, 125.64, 118.17, 104.56, 43.13, 41.85, 25.99, 22.39, 13.99. HRMS (ESI) calcd. for  $\text{C}_{23}\text{H}_{23}\text{O}_3$  [ $\text{M}+\text{H}^+$ ]: 347.1642, found: 347.1636.

### 3-(2-Oxo-2-phenylethyl)-4-phenyl-6-(p-tolyl)-2H-pyran-2-one (4a)

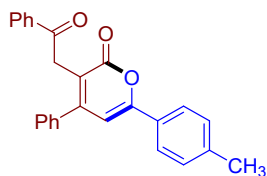

Isolated in 57% yield (43.3 mg) as yellow solid, mp 174.3 – 176.5 °C.

$^1\text{H}$  NMR (400 MHz,  $\text{CDCl}_3$ )  $\delta$  7.99 – 7.93 (m, 2H), 7.78 – 7.71 (m, 2H), 7.60 – 7.51 (m, 1H), 7.48 – 7.32 (m, 7H), 7.27 – 7.23 (m, 2H), 6.68 (s, 1H), 4.15 (s, 2H), 2.40 (s, 3H).  $^{13}\text{C}$  NMR (151 MHz,  $\text{CDCl}_3$ )  $\delta$  197.03, 163.45, 158.16, 155.10, 141.20, 137.73, 136.83, 133.34, 129.76, 129.29, 128.98, 128.82, 128.68, 128.41, 127.53, 125.62, 117.58, 103.99, 38.39, 21.58. HRMS (ESI) calcd. for  $\text{C}_{26}\text{H}_{21}\text{O}_3$  [ $\text{M}+\text{H}^+$ ]: 381.1485, found: 381.1493.

**6-(2-Methoxyphenyl)-3-(2-oxo-2-phenylethyl)-4-phenyl-2H-pyran-2-one (4b)**

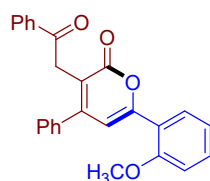

Isolated in 55% yield (43.6 mg) as yellow solid, mp 173.9 – 175.1 °C.

<sup>1</sup>H NMR (400 MHz, CDCl<sub>3</sub>) δ 8.02 – 7.92 (m, 3H), 7.60 – 7.52 (m, 1H), 7.49 – 7.34 (m, 8H), 7.17 (s, 1H), 7.07 (td, *J* = 7.9, 1.0 Hz, 1H), 6.99 (dd, *J* = 8.3, 0.5 Hz, 1H), 4.16 (s, 2H), 3.89 (s, 3H). <sup>13</sup>C NMR (101 MHz, CDCl<sub>3</sub>) δ 197.13, 163.66, 157.49, 155.29, 154.83, 138.12, 136.89, 133.31, 131.58, 129.24, 129.12, 128.91, 128.67, 128.43, 127.66, 121.08, 120.38, 117.82, 111.55, 109.66, 55.77, 38.39. HRMS (ESI) calcd. for C<sub>26</sub>H<sub>21</sub>O<sub>4</sub> [M+H<sup>+</sup>]: 397.1434, found: 397.1413.

**6-(3-Methoxyphenyl)-3-(2-oxo-2-phenylethyl)-4-phenyl-2H-pyran-2-one (4c)**

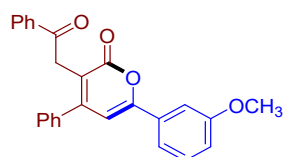

Isolated in 62% yield (49.1 mg) as yellow solid, mp 137.1 – 138.5 °C.

<sup>1</sup>H NMR (400 MHz, CDCl<sub>3</sub>) δ 8.01 – 7.92 (m, 2H), 7.59 – 7.53 (m, 1H), 7.48 – 7.32 (m, 10H), 6.99 (ddd, *J* = 8.1, 2.6, 1.0 Hz, 1H), 6.72 (s, 1H), 4.16 (s, 2H), 3.86 (s, 3H). <sup>13</sup>C NMR (151 MHz, CDCl<sub>3</sub>) δ 196.94, 163.30, 160.17, 157.72, 154.90, 137.59, 136.80, 133.38, 132.94, 130.06, 129.36, 129.02, 128.70, 128.41, 127.54, 118.29, 118.13, 116.95, 110.69, 104.90, 55.64, 38.43. HRMS (ESI) calcd. for C<sub>26</sub>H<sub>21</sub>O<sub>4</sub> [M+H<sup>+</sup>]: 397.1434, found: 397.1448.

**6-(4-Methoxyphenyl)-3-(2-oxo-2-phenylethyl)-4-phenyl-2H-pyran-2-one (4d)**

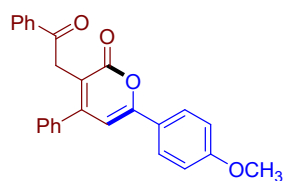

Isolated in 58% yield (46.0 mg) as yellow solid, mp 172.6 – 173.5 °C.

<sup>1</sup>H NMR (400 MHz, CDCl<sub>3</sub>) δ 7.96 (d, *J* = 7.0 Hz, 2H), 7.80 (d, *J* = 8.0 Hz, 2H), 7.61 – 7.51 (m, 1H), 7.50 – 7.31 (m, 7H), 6.95 (d, *J* = 8.1 Hz, 2H), 6.62 (s, 1H), 4.14 (s, 2H), 3.86 (s, 3H). <sup>13</sup>C NMR (151 MHz, CDCl<sub>3</sub>) δ 197.09, 163.51, 161.73, 158.06, 155.27, 137.83, 136.85, 133.32, 129.25, 128.96, 128.67, 128.40, 127.52, 127.35, 124.14, 116.81, 114.46, 103.23, 55.56, 38.35. HRMS (ESI) calcd. for C<sub>26</sub>H<sub>20</sub>NaO<sub>4</sub> [M+Na<sup>+</sup>]: 419.1254, found: 419.1215.

**6-(4-Fluorophenyl)-3-(2-oxo-2-phenylethyl)-4-phenyl-2H-pyran-2-one (4e)**

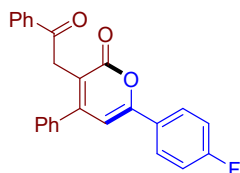

Isolated in 60% yield (46.1 mg) as yellow solid, mp 139.5 – 142.3 °C.

<sup>1</sup>H NMR (400 MHz, CDCl<sub>3</sub>) δ 8.00 – 7.93 (m, 2H), 7.89 – 7.80 (m, 2H), 7.60 – 7.53 (m, 1H), 7.50 – 7.33 (m, 7H), 7.19 – 7.09 (m, 2H), 6.67 (s, 1H), 4.16 (s, 2H). <sup>13</sup>C NMR (151 MHz, CDCl<sub>3</sub>) δ 196.90, 164.24 (d, *J* = 251.9 Hz), 163.15, 156.94, 154.92, 137.51, 136.74, 133.40, 129.40, 129.03, 128.70, 128.40, 127.86, 127.79 (d, *J* = 8.6 Hz), 127.49, 118.06, 116.23 (d, *J* = 22.1 Hz), 104.37 (d, *J* = 0.8 Hz), 38.38. HRMS (ESI) calcd. for C<sub>25</sub>H<sub>18</sub>FO<sub>3</sub> [M+H<sup>+</sup>]: 347.1234, found: 385.1268.

#### 6-(3-Chlorophenyl)-3-(2-oxo-2-phenylethyl)-4-phenyl-2H-pyran-2-one (4f)

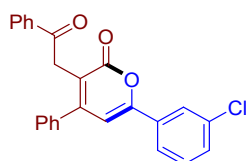

Isolated in 53% yield (42.4 mg) as yellow solid, mp 168.5 – 168.9 °C.

<sup>1</sup>H NMR (400 MHz, CDCl<sub>3</sub>) δ 8.00 – 7.93 (m, 2H), 7.84 (d, *J* = 1.6 Hz, 1H), 7.73 (dt, *J* = 7.0, 1.6 Hz, 1H), 7.60 – 7.53 (m, 1H), 7.49 – 7.33 (m, 9H), 6.73 (s, 1H), 4.17 (s, 2H). <sup>13</sup>C NMR (151 MHz, CDCl<sub>3</sub>) δ 196.81, 162.95, 156.25, 154.68, 137.34, 136.73, 136.70, 135.27, 133.46, 133.44, 133.30, 133.29, 130.68, 130.34, 129.49, 129.08, 128.72, 128.42, 127.51, 125.70, 123.73, 119.04, 105.32, 38.45. HRMS (ESI) calcd. for C<sub>25</sub>H<sub>18</sub>ClO<sub>3</sub> [M+H<sup>+</sup>]: 401.0939, found: 401.0903.

#### 6-(4-Chlorophenyl)-3-(2-oxo-2-phenylethyl)-4-phenyl-2H-pyran-2-one (4g)

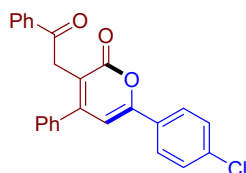

Isolated in 49% yield (39.2 mg) as yellow solid, mp 136.3 – 137.2 °C.

<sup>1</sup>H NMR (400 MHz, CDCl<sub>3</sub>) δ 7.96 (d, *J* = 7.5 Hz, 2H), 7.79 (d, *J* = 8.2 Hz, 2H), 7.56 (t, *J* = 7.0 Hz, 1H), 7.50 – 7.32 (m, 9H), 6.71 (s, 1H), 4.16 (s, 2H). <sup>13</sup>C NMR (151 MHz, CDCl<sub>3</sub>) δ 196.86, 163.06, 156.72, 154.81, 137.43, 136.87, 136.73, 133.44, 130.04, 129.45, 129.36, 129.06, 128.72, 128.42, 127.50, 126.92, 118.57, 104.81, 38.42. HRMS (ESI) calcd. for C<sub>25</sub>H<sub>18</sub>ClO<sub>3</sub> [M+H<sup>+</sup>]: 401.0939, found: 401.0902.

#### 3-(2-Oxo-2-phenylethyl)-4-phenyl-6-(4-(trifluoromethyl)phenyl)-2H-pyran-2-one (4h)

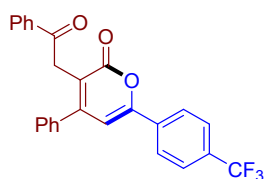

Isolated in 45% yield (39.1 mg) as yellow solid, mp 142.6 – 145.1 °C.

$^1\text{H}$  NMR (400 MHz,  $\text{CDCl}_3$ )  $\delta$  7.97 (d,  $J = 7.7$  Hz, 4H), 7.72 (d,  $J = 8.0$  Hz, 2H), 7.58 (t,  $J = 7.0$  Hz, 1H), 7.51 – 7.33 (m, 7H), 6.81 (s, 1H), 4.18 (s, 2H).  $^{13}\text{C}$  NMR (151 MHz,  $\text{CDCl}_3$ )  $\delta$  196.76, 162.85, 156.03, 154.56, 137.22, 136.66, 134.79, 133.52, 132.27 (q,  $J = 32.8$  Hz), 129.56, 129.12, 128.75, 128.43, 127.51, 126.06 (q,  $J = 3.6$  Hz), 125.91, 123.86 (q,  $J = 272.3$  Hz), 119.63, 105.97, 38.49. HRMS (ESI) calcd. for  $\text{C}_{26}\text{H}_{17}\text{F}_3\text{NaO}_3$  [ $\text{M}+\text{Na}^+$ ]: 457.1022, found: 457.0957.

#### 6-(3,4-Dichlorophenyl)-3-(2-oxo-2-phenylethyl)-4-phenyl-2H-pyran-2-one (4i)

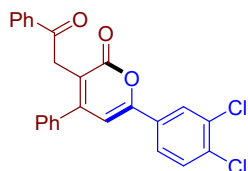

Isolated in 56% yield (48.6 mg) as yellow solid, mp 168.2 – 169.1 °C.

$^1\text{H}$  NMR (400 MHz,  $\text{CDCl}_3$ )  $\delta$  7.99 – 7.92 (m, 3H), 7.68 (dd,  $J = 8.5, 2.2$  Hz, 1H), 7.61 – 7.54 (m, 1H), 7.52 (d,  $J = 8.5$  Hz, 1H), 7.49 – 7.39 (m, 5H), 7.39 – 7.33 (m, 2H), 6.72 (s, 1H), 4.16 (s, 2H).  $^{13}\text{C}$  NMR (151 MHz,  $\text{CDCl}_3$ )  $\delta$  196.71, 162.72, 155.30, 154.58, 137.18, 136.64, 134.91, 133.65, 133.49, 131.42, 131.10, 129.55, 129.10, 128.73, 128.40, 127.48, 127.39, 124.63, 119.30, 105.43, 38.47. HRMS (ESI) calcd. for  $\text{C}_{25}\text{H}_{17}\text{Cl}_2\text{O}_3$  [ $\text{M}+\text{H}^+$ ]: 435.0549, found: 435.0543.

#### 3-(2-Oxo-2-phenylethyl)-4-phenyl-6-(thiophen-2-yl)-2H-pyran-2-one (4j)

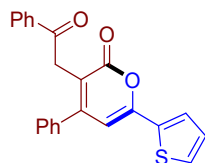

Isolated in 65% yield (48.4 mg) as yellow solid, mp 189.5 – 190.7 °C.

$^1\text{H}$  NMR (400 MHz,  $\text{CDCl}_3$ )  $\delta$  7.99 – 7.92 (m, 2H), 7.61 (dd,  $J = 3.8, 1.2$  Hz, 1H), 7.59 – 7.52 (m, 1H), 7.48 – 7.38 (m, 6H), 7.38 – 7.32 (m, 2H), 7.13 – 7.08 (m, 1H), 6.55 (s, 1H), 4.13 (s, 2H).  $^{13}\text{C}$  NMR (151 MHz,  $\text{CDCl}_3$ )  $\delta$  196.92, 162.69, 155.03, 153.65, 137.39, 136.77, 135.24, 133.36, 129.38, 129.01, 128.68, 128.66, 128.43, 128.38, 127.48, 127.31, 117.56, 103.70, 38.43. HRMS (ESI) calcd. for  $\text{C}_{23}\text{H}_{17}\text{O}_3\text{S}$  [ $\text{M}+\text{H}^+$ ]: 373.0893, found: 373.0887.

#### 6-Methyl-3-(2-oxo-2-phenylethyl)-4-phenyl-2H-pyran-2-one (4k)

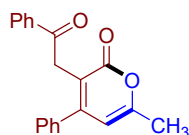

Isolated in 54% yield (32.8 mg) as yellow oil.

$^1\text{H}$  NMR (400 MHz,  $\text{CDCl}_3$ )  $\delta$  7.91 – 7.84 (m, 2H), 7.48 (t,  $J = 7.4$  Hz, 1H), 7.37 (t,  $J = 7.6$  Hz, 2H), 7.33 – 7.27 (m, 3H), 7.26 – 7.20 (m, 2H), 5.99 (s, 1H), 4.02 (s, 2H), 2.23 (s, 3H).  $^{13}\text{C}$  NMR (151 MHz,  $\text{CDCl}_3$ )  $\delta$  197.08, 164.12, 159.49, 154.89, 137.47, 136.78, 133.35, 129.24, 128.91, 128.68, 128.40, 127.46, 116.72, 106.82, 38.20, 19.93. HRMS (ESI) calcd. for  $\text{C}_{20}\text{H}_{17}\text{O}_3$  [ $\text{M}+\text{H}^+$ ]: 305.1172, found: 305.1187.

**6-(*tert*-Butyl)-3-(2-oxo-2-phenylethyl)-4-phenyl-2H-pyran-2-one (4l)**

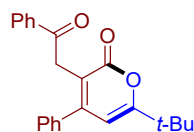

Isolated in 59% yield (40.8 mg) as yellow solid, mp 98.5 – 99.7 °C.

<sup>1</sup>H NMR (400 MHz, CDCl<sub>3</sub>) δ 8.00 – 7.91 (m, 2H), 7.59 – 7.51 (m, 1H), 7.47 – 7.41 (m, 2H), 7.41 – 7.36 (m, 3H), 7.34 – 7.30 (m, 2H), 6.08 (s, 1H), 4.09 (s, 2H), 1.32 (s, 9H). <sup>13</sup>C NMR (151 MHz, CDCl<sub>3</sub>) δ 197.15, 169.93, 164.00, 154.81, 137.94, 136.87, 133.31, 129.16, 128.90, 128.66, 128.40, 127.52, 116.82, 102.79, 38.21, 36.14, 28.17. HRMS (ESI) calcd. for C<sub>23</sub>H<sub>23</sub>O<sub>3</sub> [M+H<sup>+</sup>]: 347.1642, found: 347.1652.

**3-(2-Hydroxy-2-phenylethyl)-4,6-diphenyl-2H-pyran-2-one (5)**

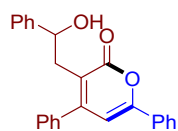

Isolated in 82% yield (30.2 mg) as white solid, mp 169.4 – 170.2 °C.

<sup>1</sup>H NMR (400 MHz, CDCl<sub>3</sub>) δ 7.87 – 7.80 (m, 2H), 7.50 – 7.39 (m, 6H), 7.29 – 7.17 (m, 7H), 6.64 (s, 1H), 5.10 (dd, *J* = 8.4, 4.0 Hz, 1H), 3.43 (s, 1H), 2.99 (dd, *J* = 14.0, 8.6 Hz, 1H), 2.89 (dd, *J* = 14.0, 4.2 Hz, 1H). <sup>13</sup>C NMR (151 MHz, CDCl<sub>3</sub>) δ 165.38, 157.35, 155.52, 144.50, 137.66, 131.26, 130.86, 129.09, 128.98, 128.78, 128.44, 127.85, 127.43, 125.66, 125.61, 120.76, 105.26, 73.79, 38.15. HRMS (ESI) calcd. for C<sub>25</sub>H<sub>21</sub>O<sub>3</sub> [M+H<sup>+</sup>]: 369.1485, found: 369.1479.

**2-(2,4-Diphenylnaphthalen-1-yl)-1-phenylethan-1-one (6)**

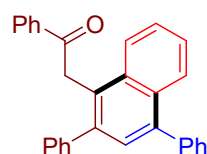

Isolated in 75% yield (29.9 mg) as white solid, mp 53.4 – 55.2 °C.

<sup>1</sup>H NMR (400 MHz, CDCl<sub>3</sub>) δ 8.07 – 8.01 (m, 2H), 7.98 (dd, *J* = 8.4, 1.0 Hz, 1H), 7.74 (d, *J* = 8.0 Hz, 1H), 7.65 – 7.58 (m, 1H), 7.58 – 7.53 (m, 2H), 7.53 – 7.39 (m, 10H), 7.39 – 7.29 (m, 3H), 4.77 (s, 2H). <sup>13</sup>C NMR (101 MHz, CDCl<sub>3</sub>) δ 198.36, 142.11, 140.74, 140.41, 139.74, 136.85, 133.47, 133.09, 131.41, 130.38, 129.40, 129.32, 128.87, 128.45, 128.43, 128.38, 127.99, 127.42, 127.41, 127.06, 126.73, 125.74, 124.81, 40.78. HRMS (ESI) calcd. for C<sub>30</sub>H<sub>23</sub>O [M+H<sup>+</sup>]: 399.1743, found: 399.1778.

**Ethyl 1-oxo-3,5,7-triphenyl-1H-isochromene-8-carboxylate (7)**

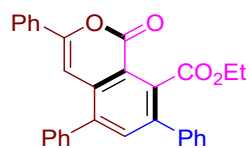

Isolated in 42% yield (18.7 mg) as yellow solid, mp 157.3 – 159.9 °C.

$^1\text{H}$  NMR (400 MHz,  $\text{CDCl}_3$ )  $\delta$  7.80 – 7.72 (m, 2H), 7.70 (s, 1H), 7.57 – 7.37 (m, 13H), 7.04 (s, 1H), 4.31 (q,  $J = 7.2$  Hz, 2H), 1.21 (t,  $J = 7.2$  Hz, 3H).  $^{13}\text{C}$  NMR (151 MHz,  $\text{CDCl}_3$ )  $\delta$  168.25, 160.85, 153.89, 140.14, 139.50, 138.59, 138.17, 137.41, 134.98, 134.64, 131.78, 130.31, 129.73, 129.08, 128.99, 128.97, 128.52, 128.49, 128.34, 125.48, 117.83, 99.43, 61.94, 13.96. HRMS (ESI) calcd. for  $\text{C}_{30}\text{H}_{23}\text{O}_4$  [ $\text{M}+\text{H}^+$ ]: 447.1591, found: 447.1586.

**6-(4-Chlorophenyl)-4-(4-methoxyphenyl)-3-(2-oxo-2-phenylethyl)-2H-pyran-2-one (8)**

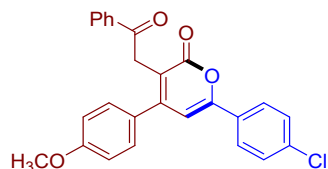

Isolated in 54% yield (46.5 mg) as yellow solid, mp 185.9 – 189.5 °C.

$^1\text{H}$  NMR (400 MHz,  $\text{CDCl}_3$ )  $\delta$  8.01 – 7.95 (m, 2H), 7.82 – 7.75 (m, 2H), 7.61 – 7.54 (m, 1H), 7.50 – 7.39 (m, 4H), 7.34 – 7.28 (m, 2H), 6.97 – 6.89 (m, 2H), 6.70 (s, 1H), 4.19 (s, 2H), 3.82 (s, 3H).  $^{13}\text{C}$  NMR (151 MHz,  $\text{CDCl}_3$ )  $\delta$  197.10, 163.20, 160.57, 156.50, 154.49, 136.79, 136.77, 133.43, 130.13, 129.63, 129.33, 129.09, 128.72, 128.44, 126.90, 118.06, 114.45, 105.01, 55.50, 38.63. HRMS (ESI) calcd. for  $\text{C}_{26}\text{H}_{20}\text{ClO}_4$  [ $\text{M}+\text{H}^+$ ]: 431.1045, found: 431.1039.

**N-(1-Benzoyl-2,6-diphenyl-5-oxaspiro[2.4]hept-6-en-4-ylidene)-4-methylbenzenesulfonamide (9)**

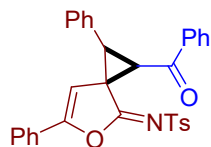

Isolated in 65% yield (67.8 mg) as yellow solid, mp 165.1 – 168.2 °C.

$^1\text{H}$  NMR (400 MHz,  $\text{CDCl}_3$ )  $\delta$  8.05 (d,  $J = 7.5$  Hz, 2H), 7.65 (t,  $J = 7.4$  Hz, 1H), 7.61 – 7.49 (m, 4H), 7.42 – 7.33 (m, 5H), 7.32 – 7.24 (m, 5H), 7.16 (d,  $J = 8.1$  Hz, 2H), 6.26 (s, 1H), 4.29 (d,  $J = 8.1$  Hz, 1H), 4.07 (d,  $J = 8.1$  Hz, 1H), 2.39 (s, 3H).  $^{13}\text{C}$  NMR (151 MHz,  $\text{CDCl}_3$ )  $\delta$  194.15, 169.23, 155.16, 143.31, 138.25, 136.59, 134.37, 131.00, 130.02, 129.90, 129.16, 129.11, 128.88, 128.68, 128.38, 128.05, 127.43, 127.16, 124.91, 101.94, 46.80, 43.40, 40.15, 21.70. HRMS (ESI) calcd. for  $\text{C}_{32}\text{H}_{26}\text{NO}_4\text{S}$  [ $\text{M}+\text{H}^+$ ]: 520.1577, found: 520.1574.

The diastereomer of **9**

Isolated in 25% yield (26.0 mg) as yellow solid, mp 164.3 – 167.5 °C.

$^1\text{H}$  NMR (400 MHz,  $\text{CDCl}_3$ )  $\delta$  7.81 – 7.76 (m, 2H), 7.62 – 7.54 (m, 5H), 7.44 – 7.36 (m, 8H), 7.35 – 7.31 (m, 2H), 7.14 (d,  $J = 8.0$  Hz, 2H), 5.63 (s, 1H), 4.03 (d,  $J = 8.6$  Hz, 1H), 3.80 (d,  $J = 8.6$  Hz, 1H), 2.40 (s, 3H).  $^{13}\text{C}$  NMR (151 MHz,  $\text{CDCl}_3$ )  $\delta$  189.90, 169.41, 156.20, 143.16, 138.25, 136.30, 134.28, 133.72, 130.29, 129.20, 129.07, 129.03, 128.92, 128.50, 128.35, 128.25, 127.27, 127.03, 125.12, 100.76, 44.78, 42.23, 40.06, 21.70. HRMS (ESI) calcd. for  $\text{C}_{32}\text{H}_{26}\text{NO}_4\text{S}$  [ $\text{M}+\text{H}^+$ ]: 520.1577, found: 520.1541.

## 8. Spectra of the New Compounds

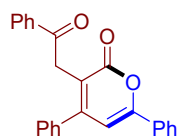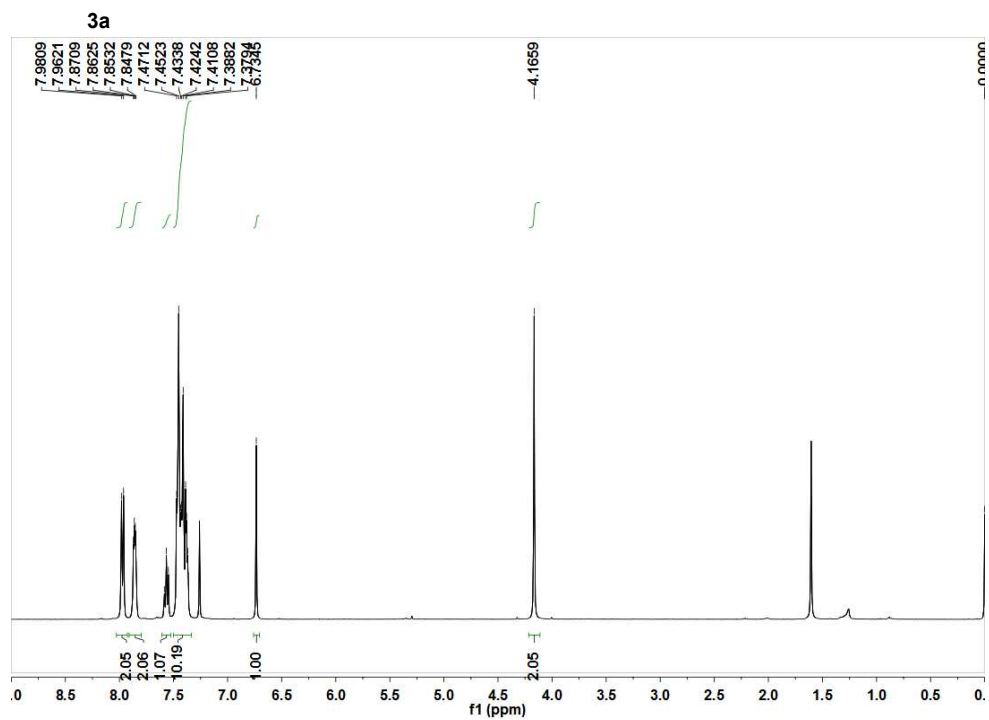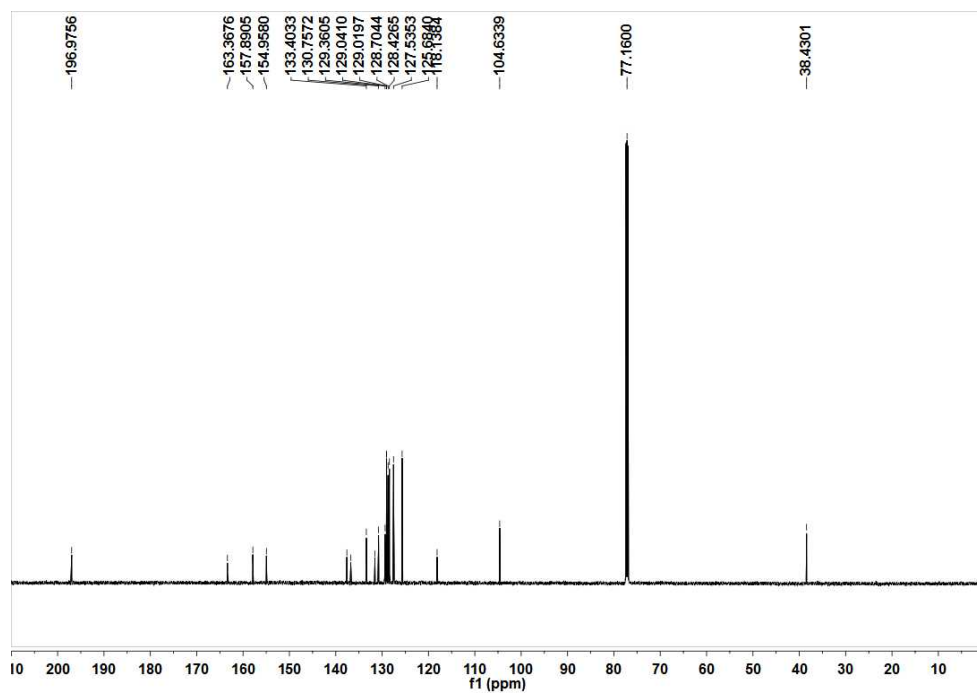

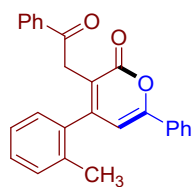

**3b**

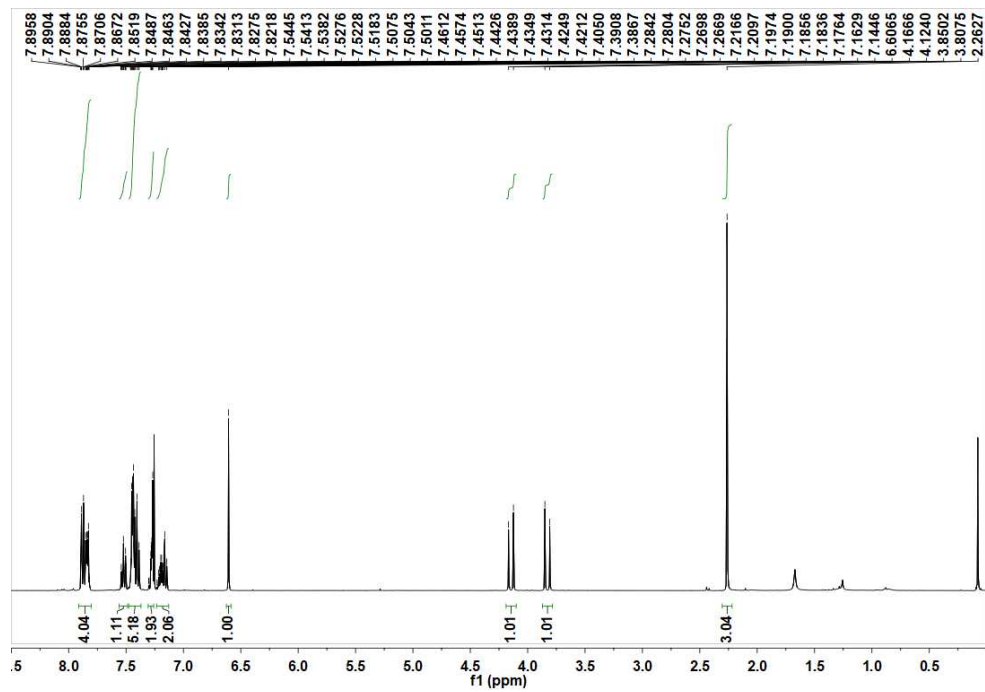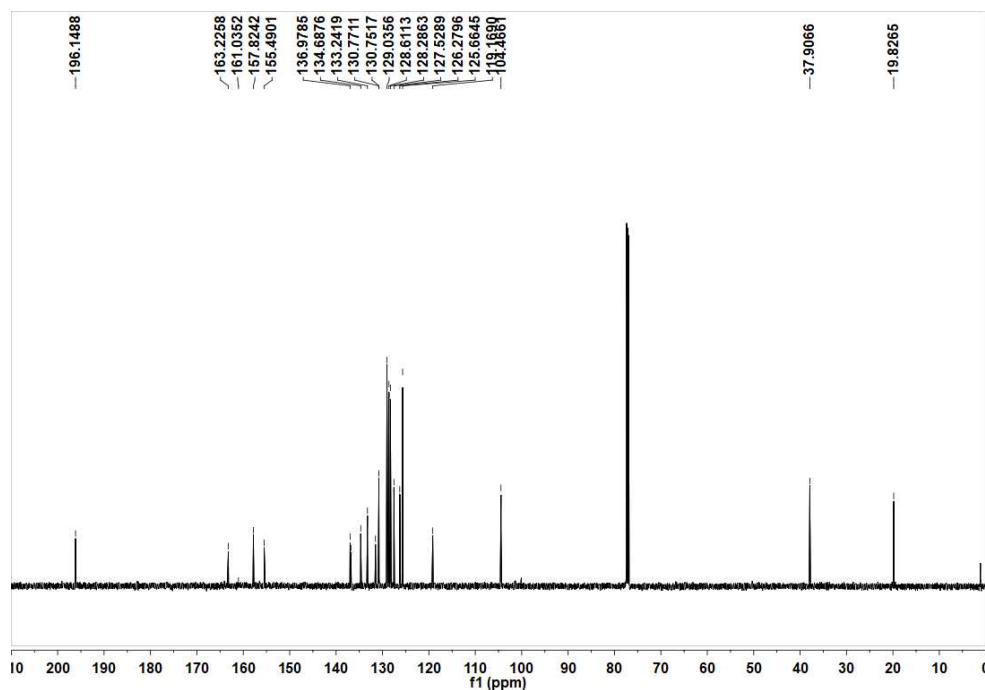



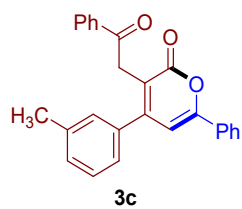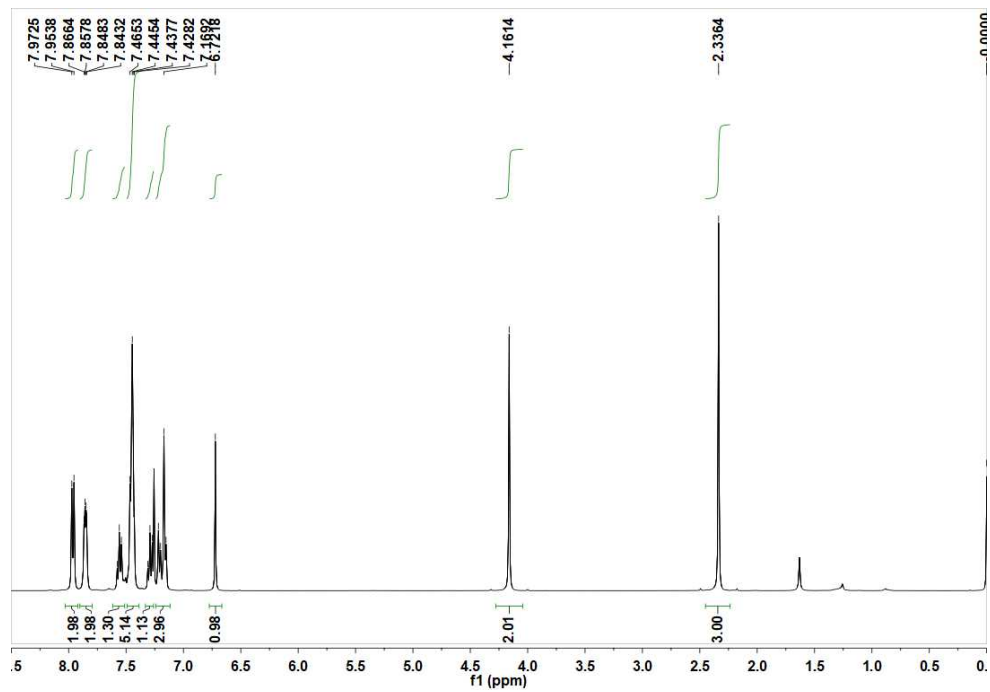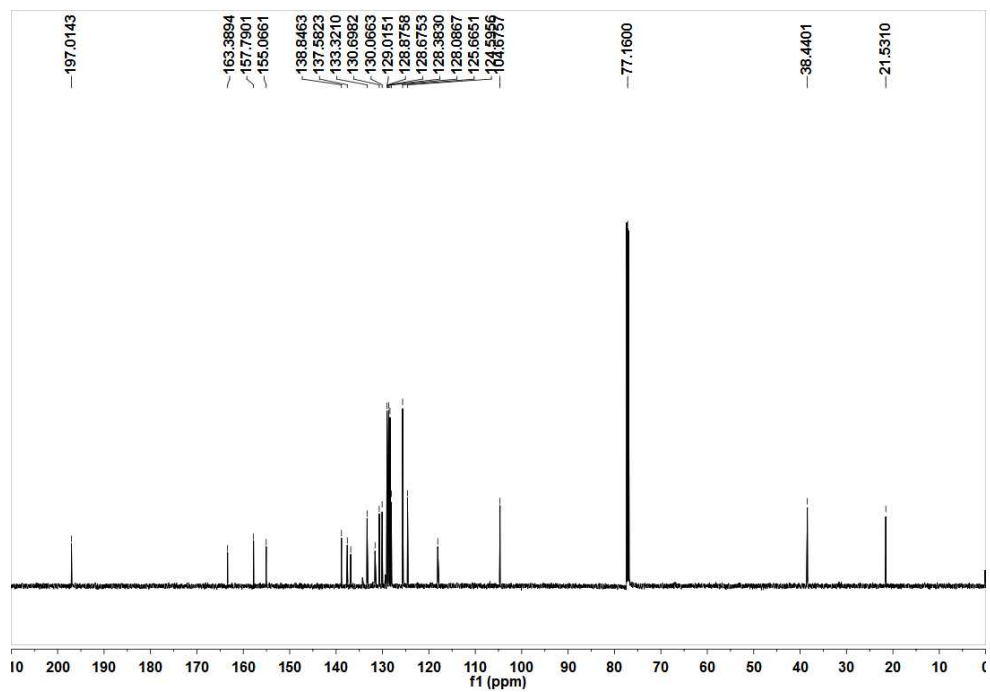

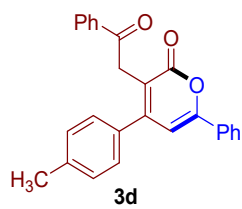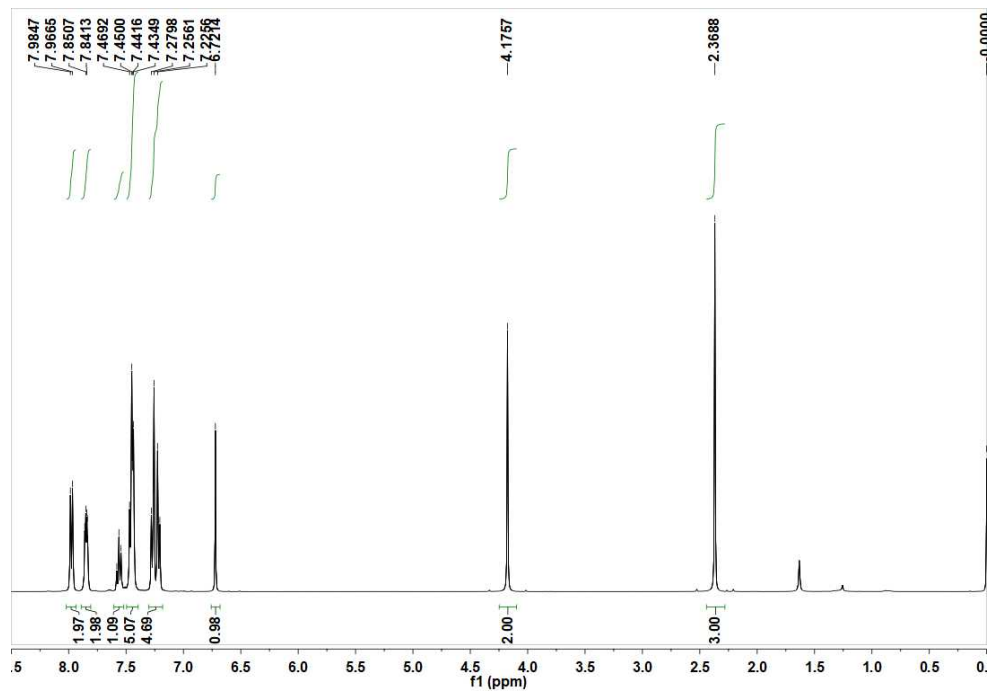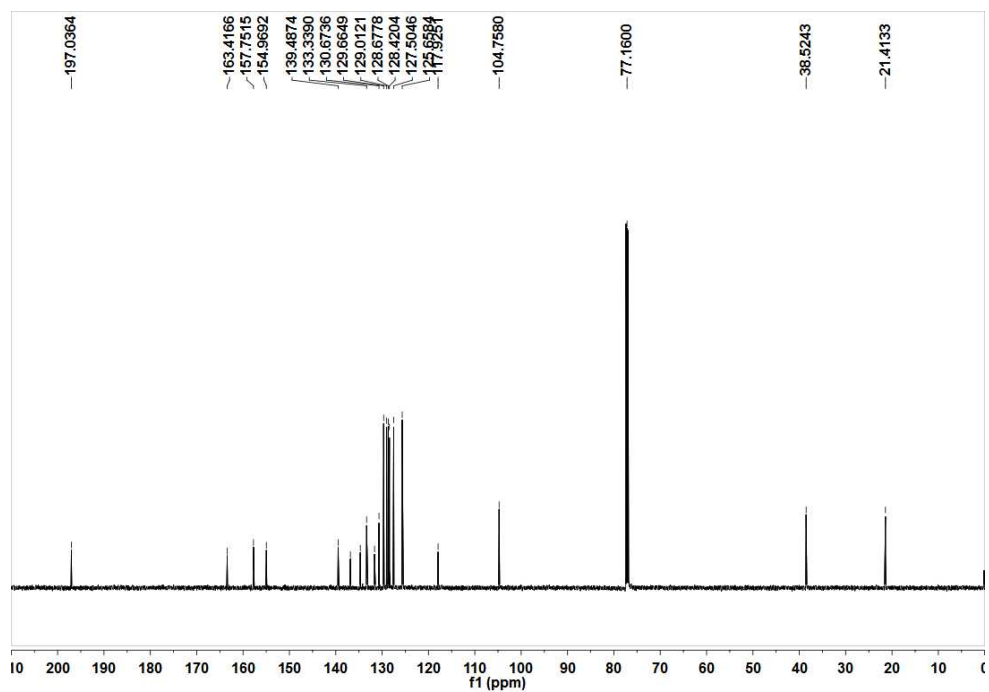

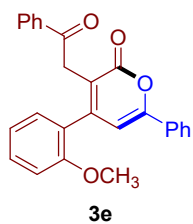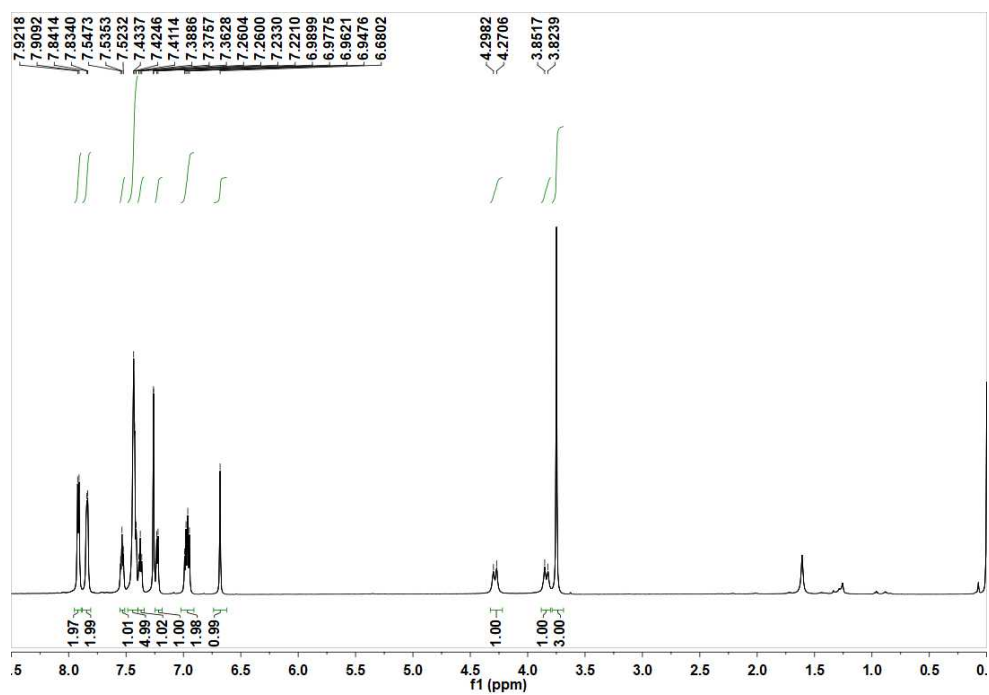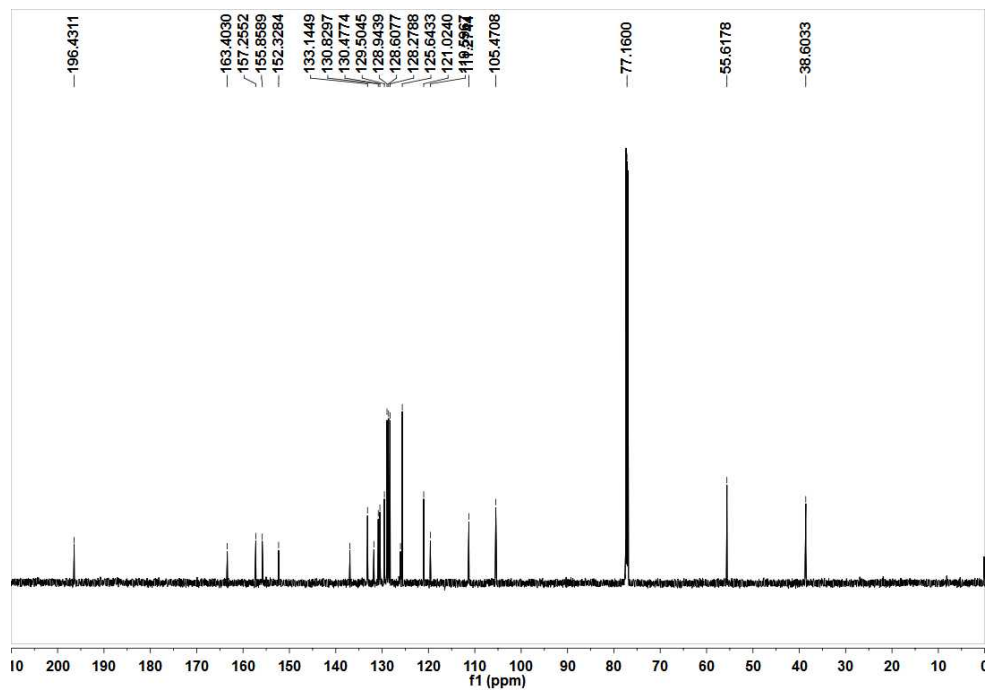

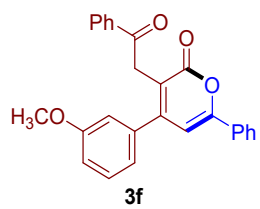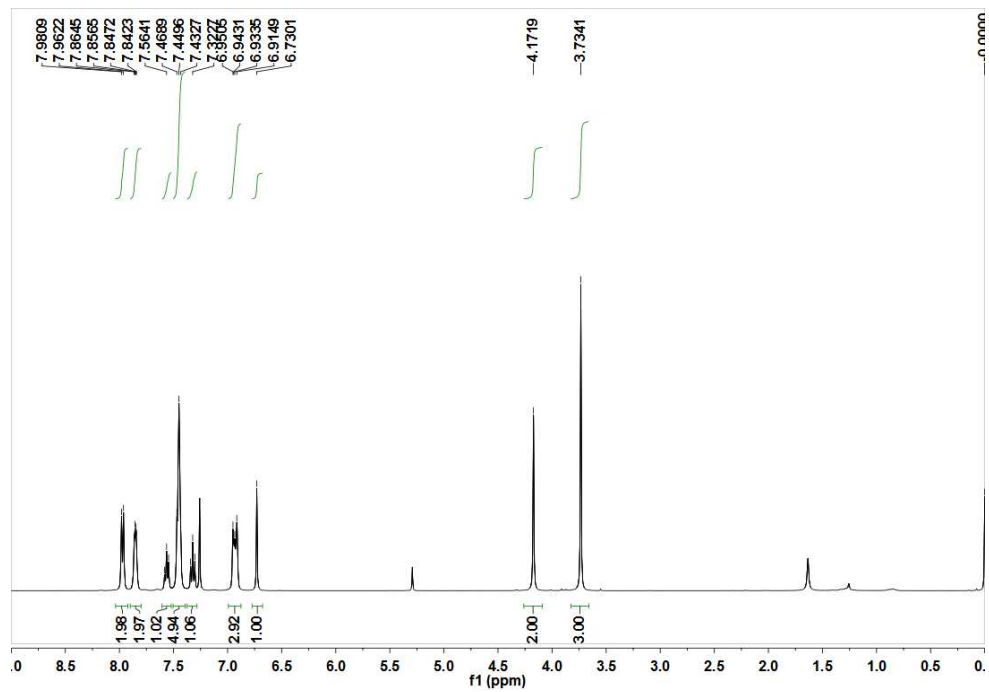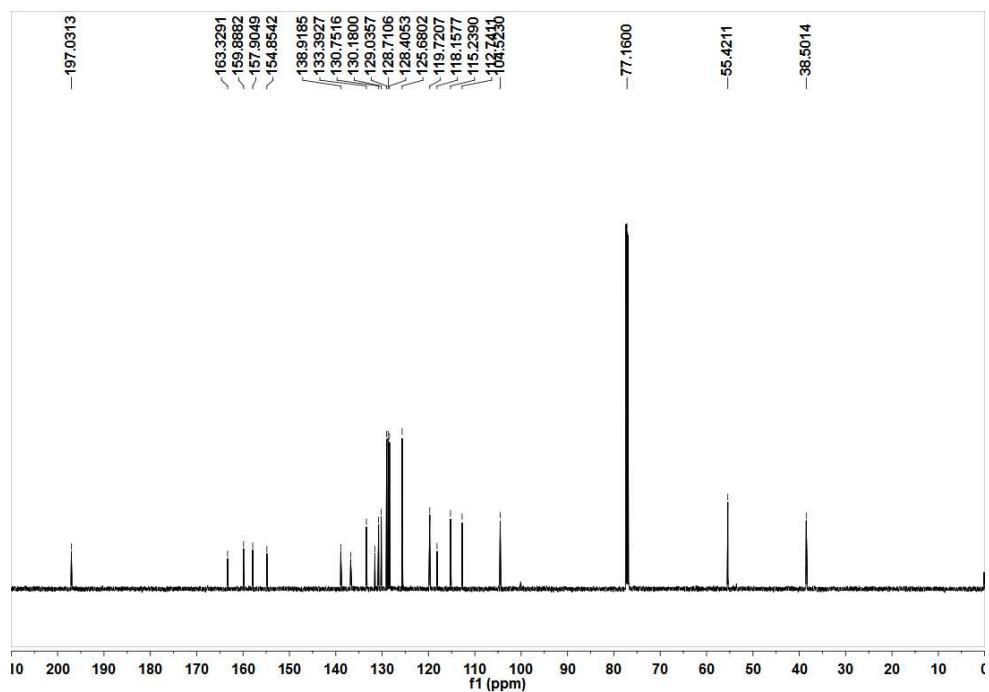

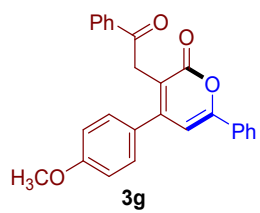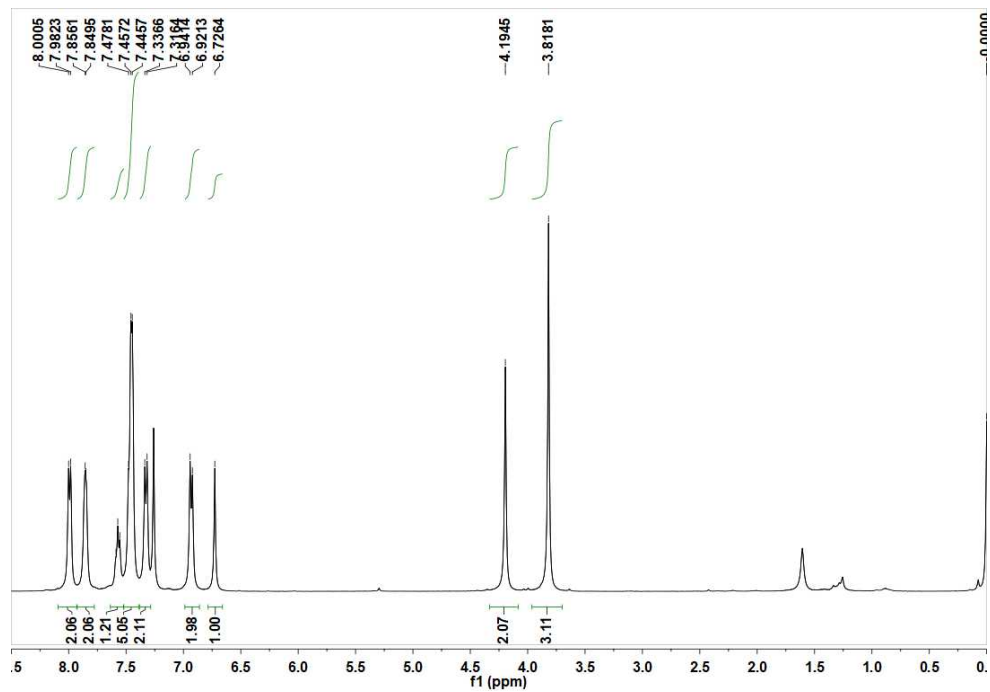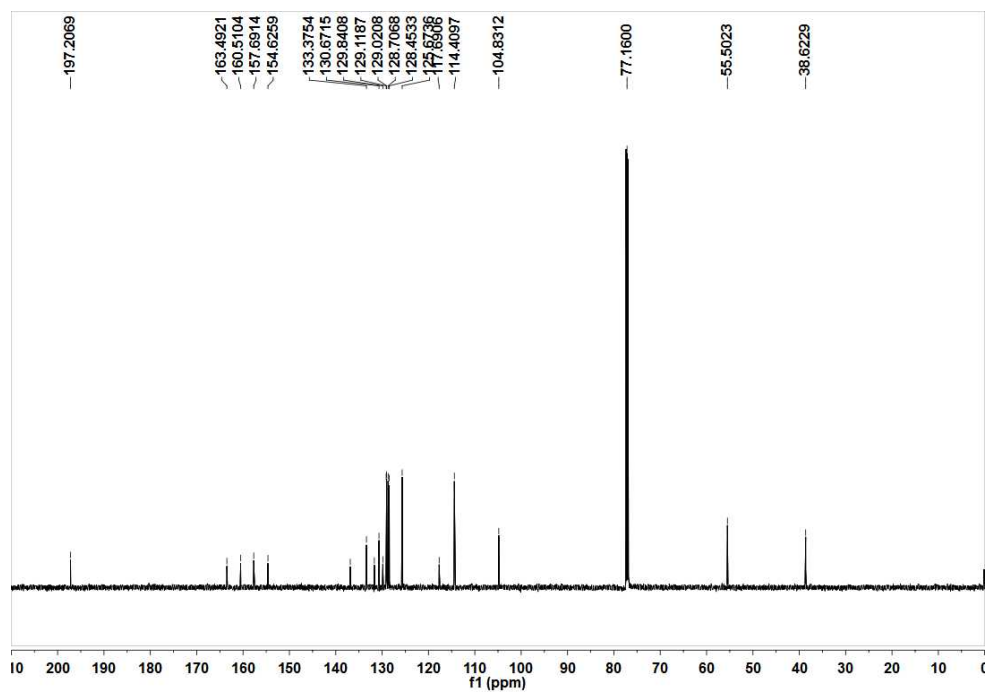

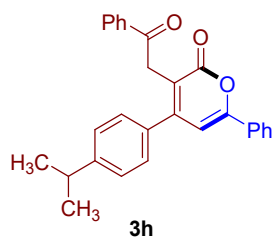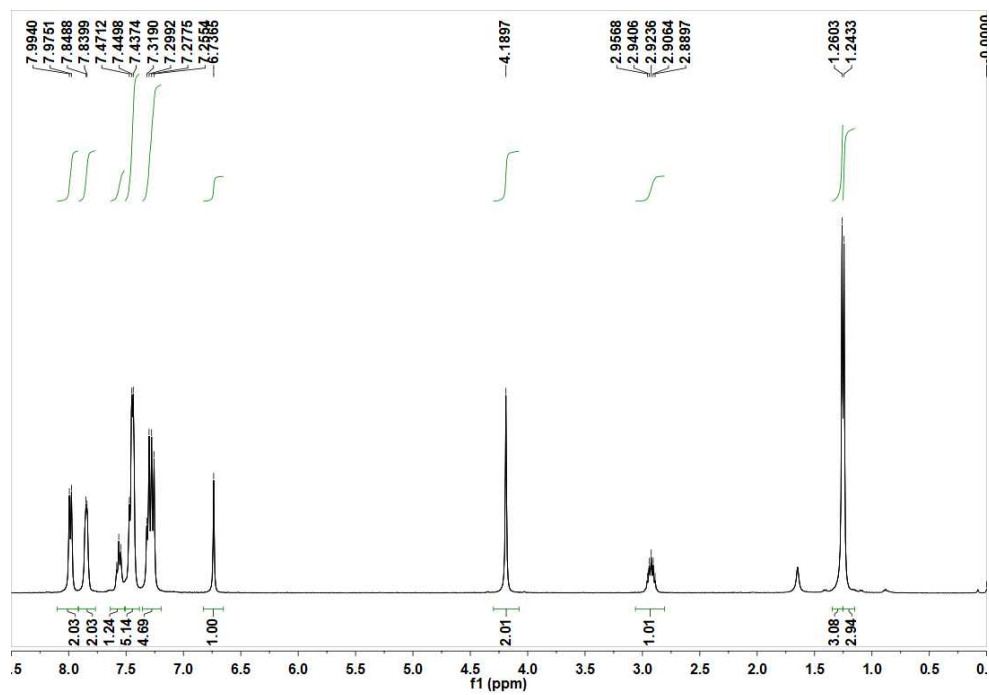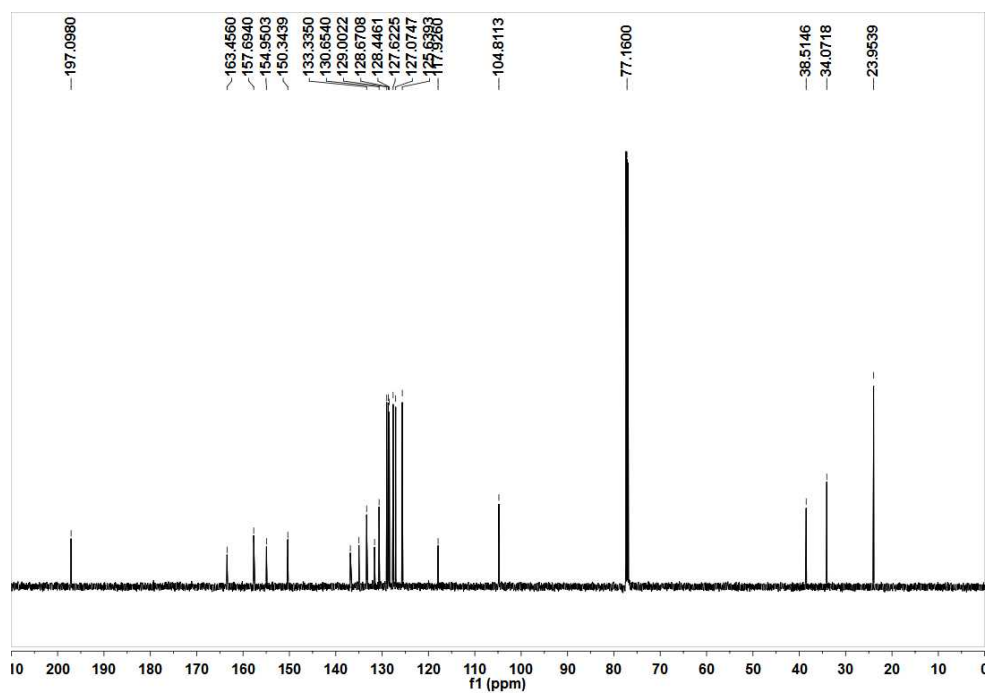

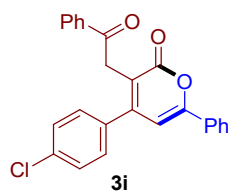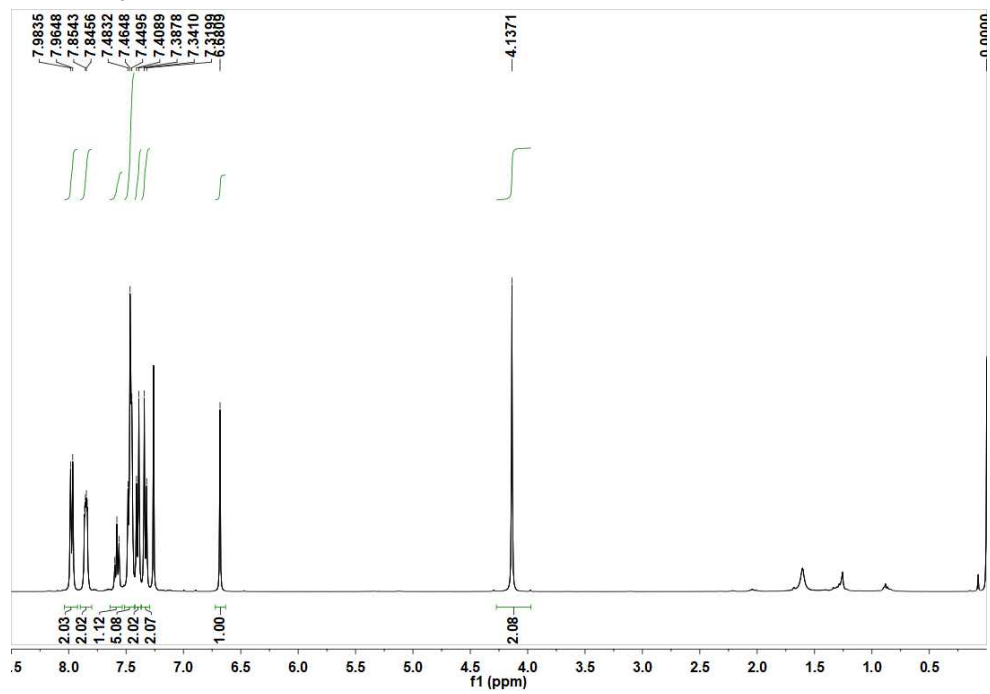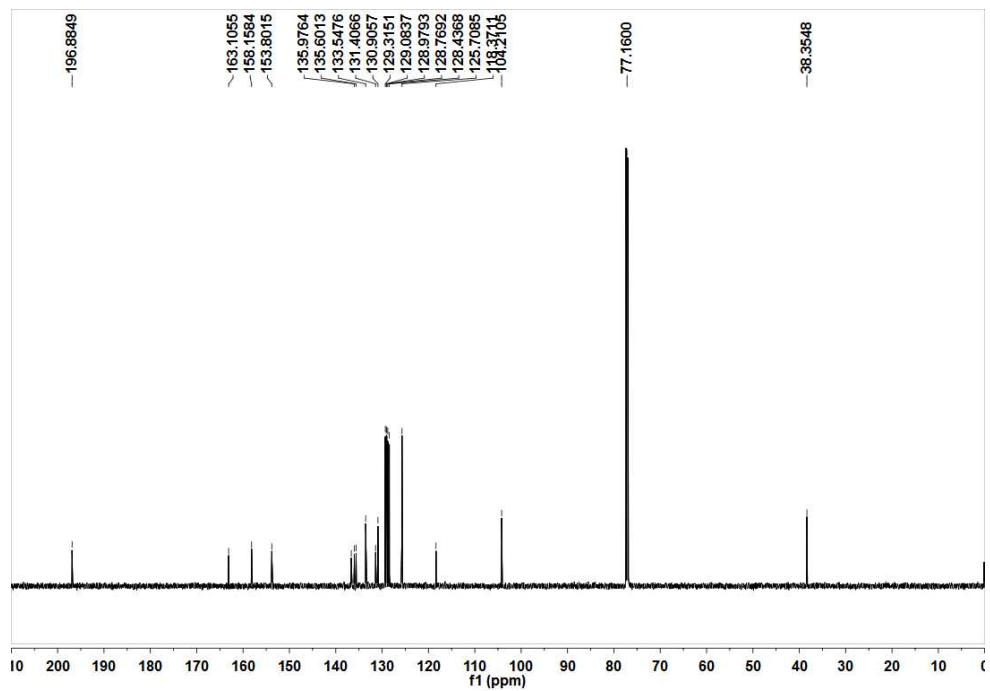

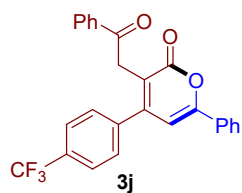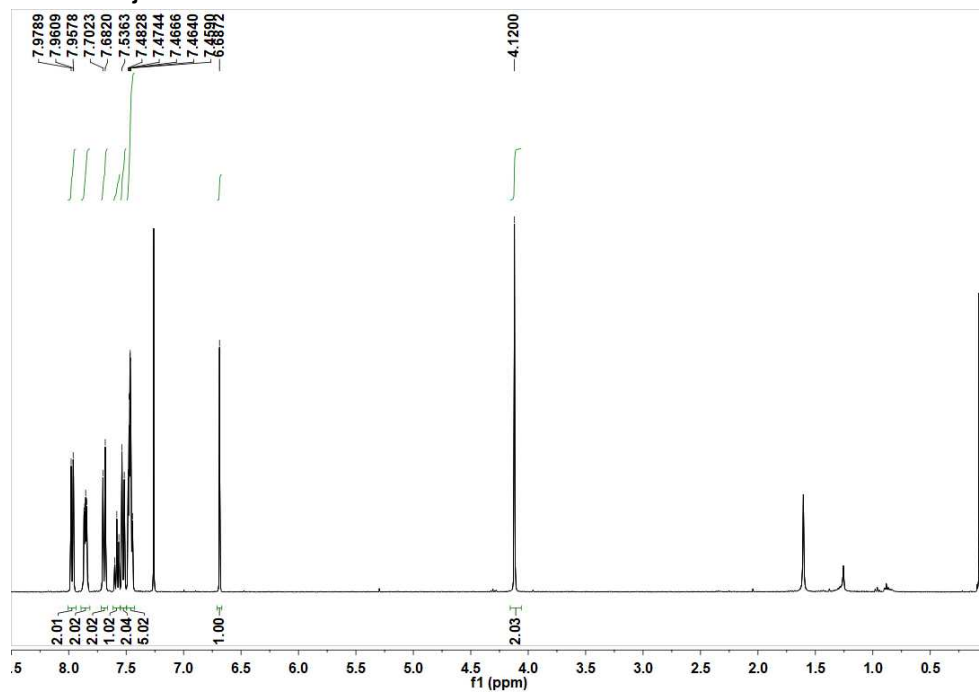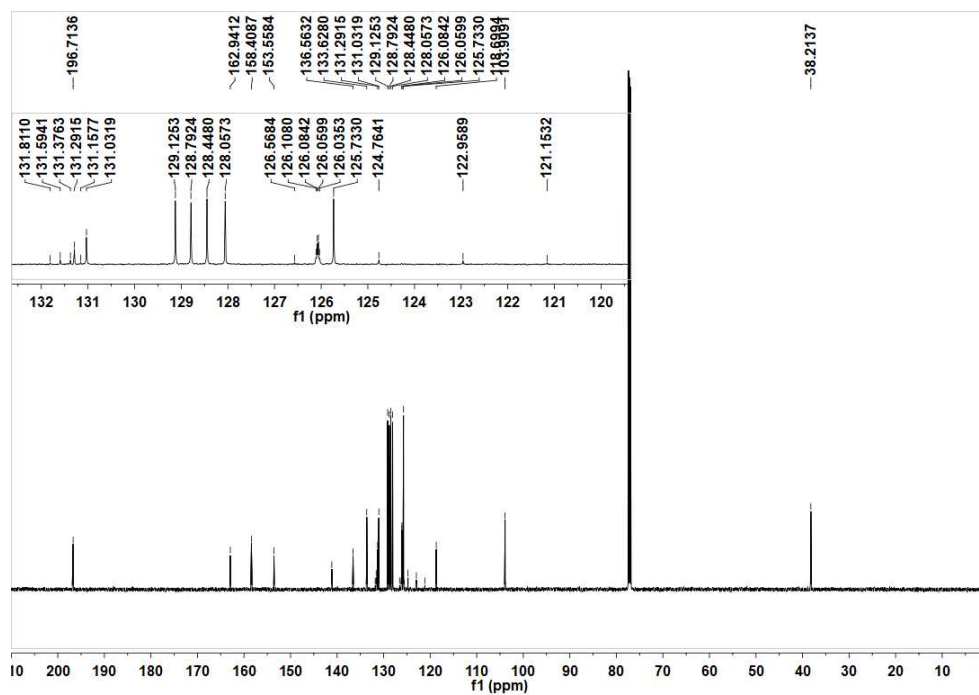



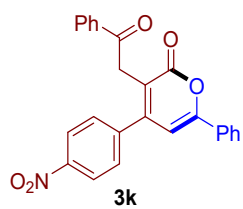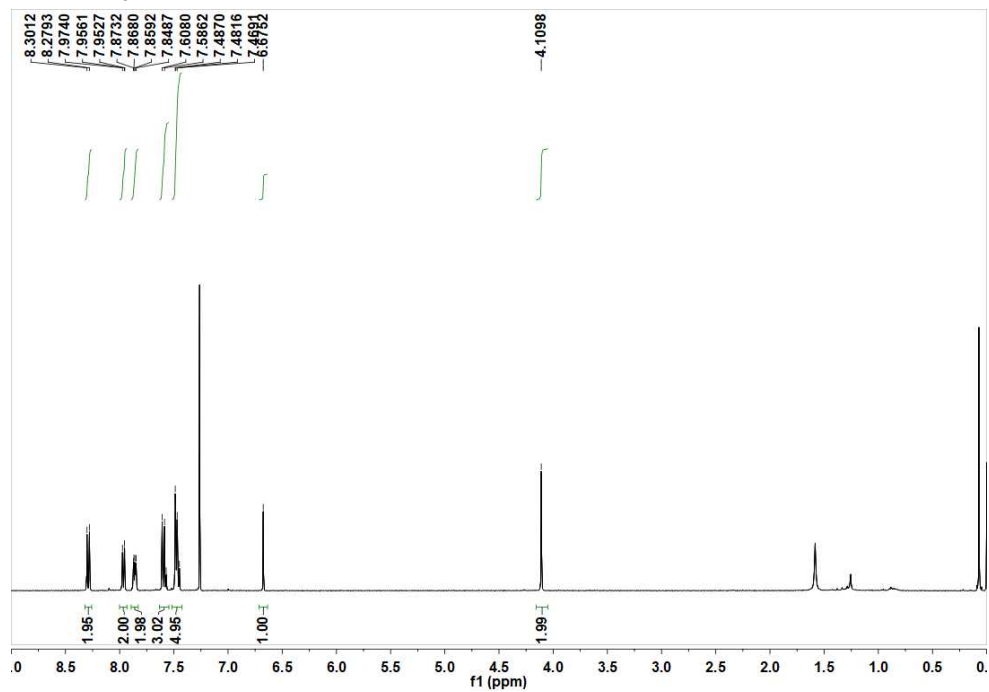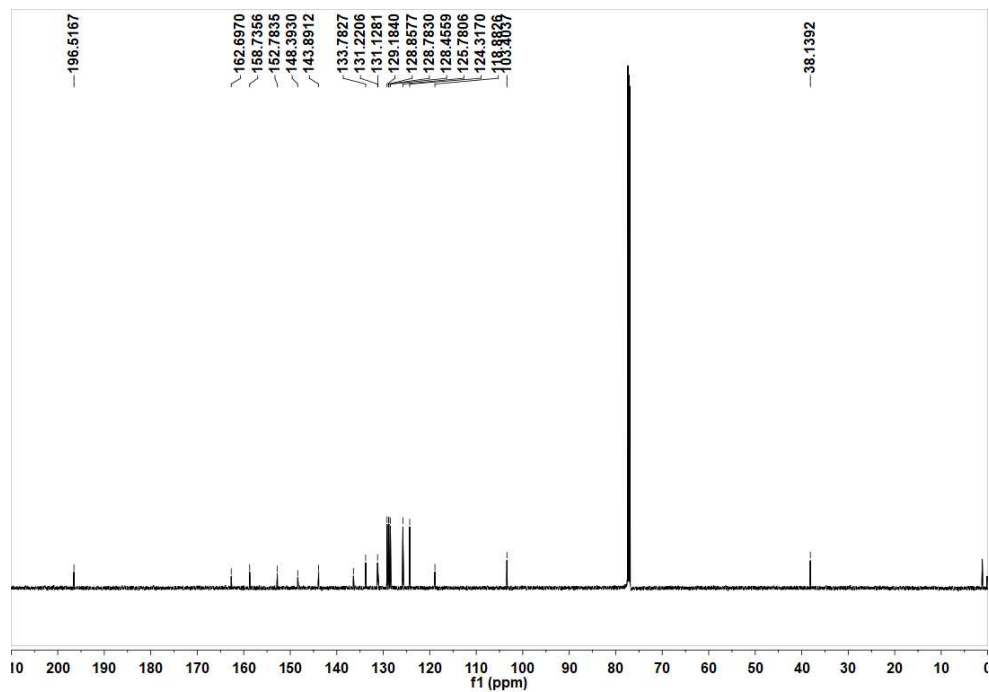

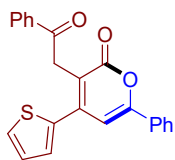

3I

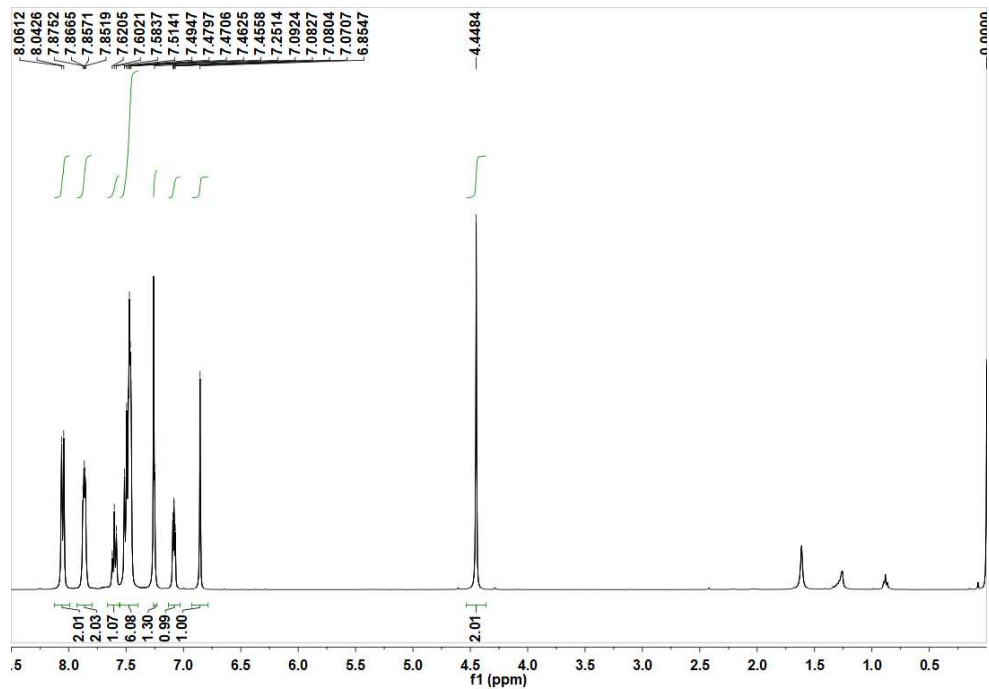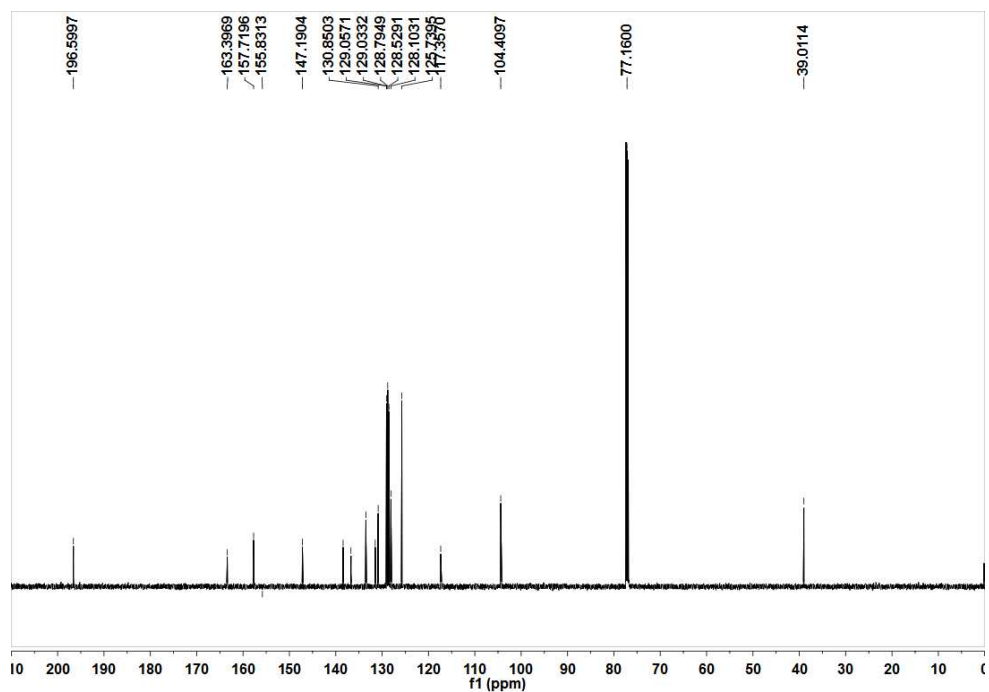

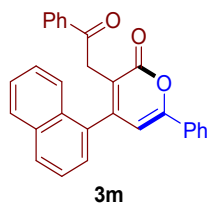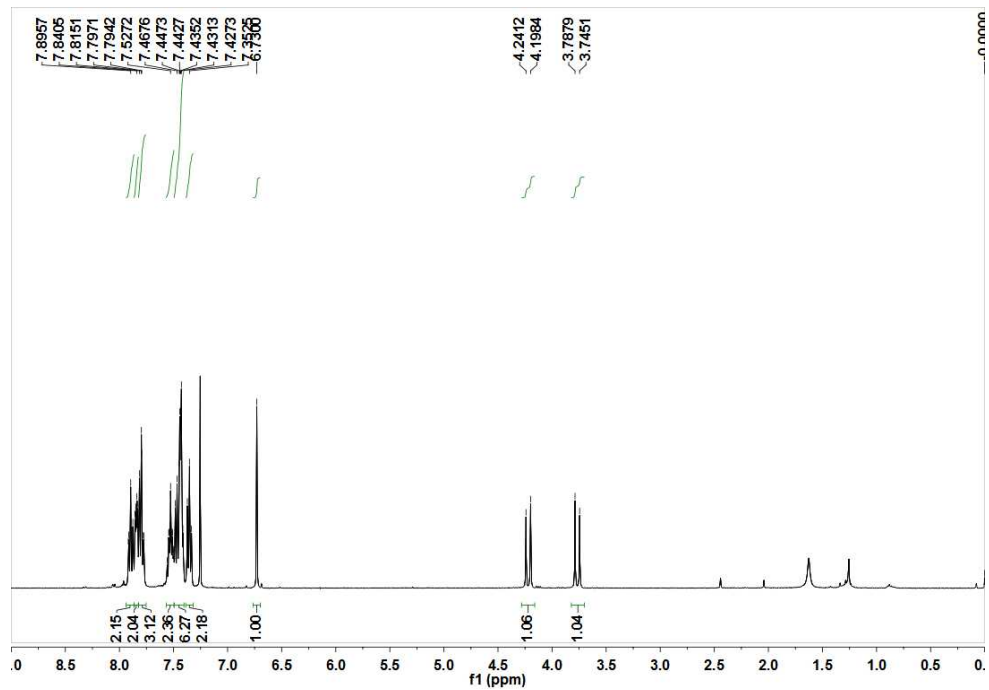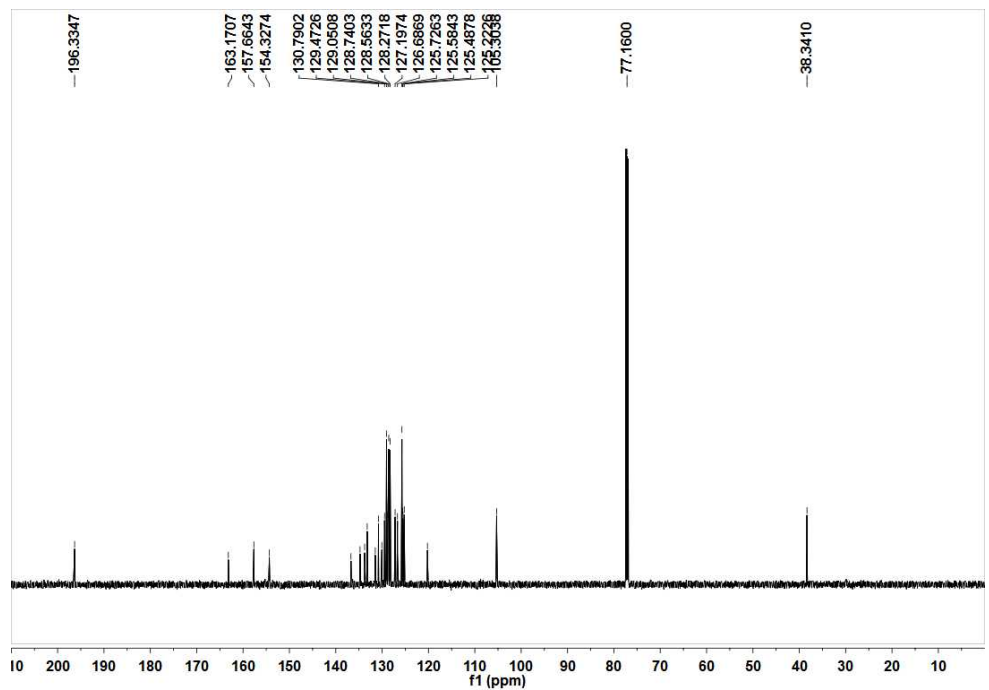

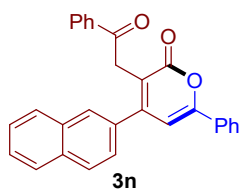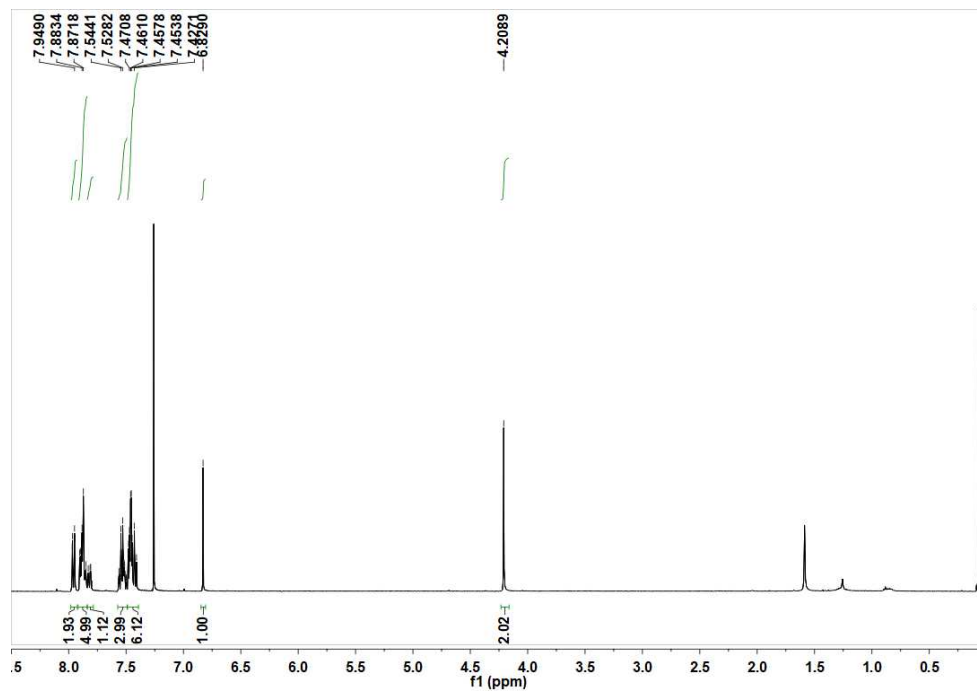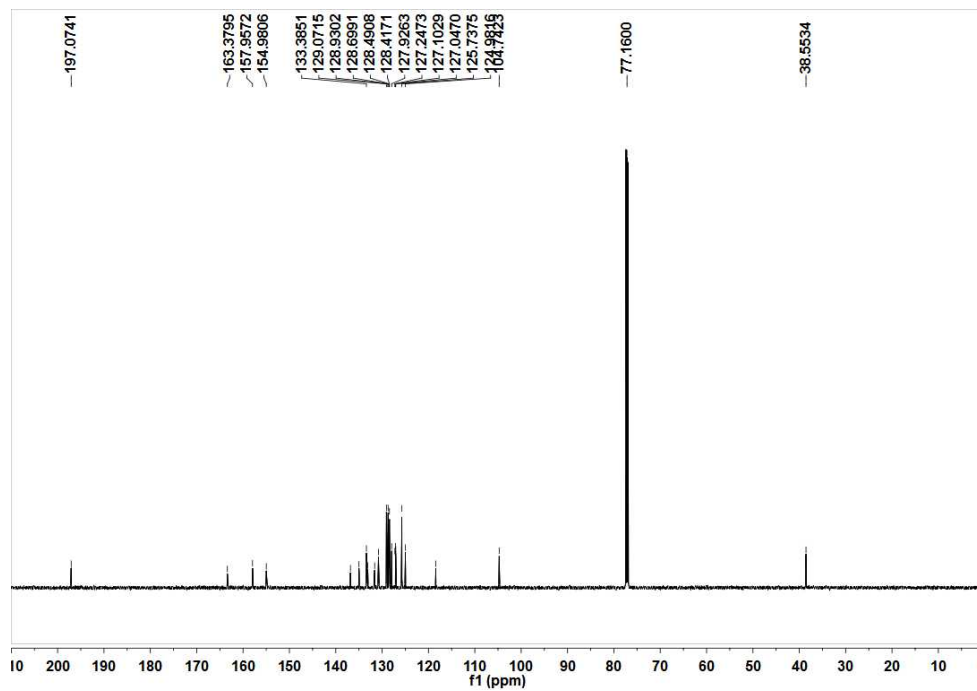

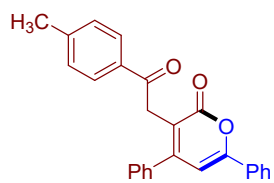

**3o**

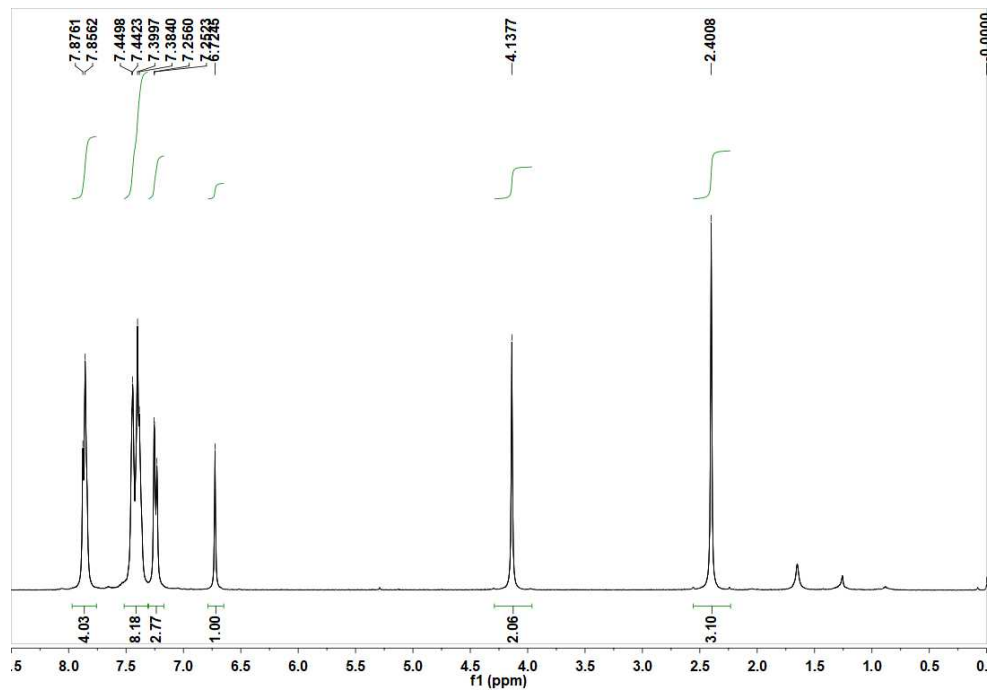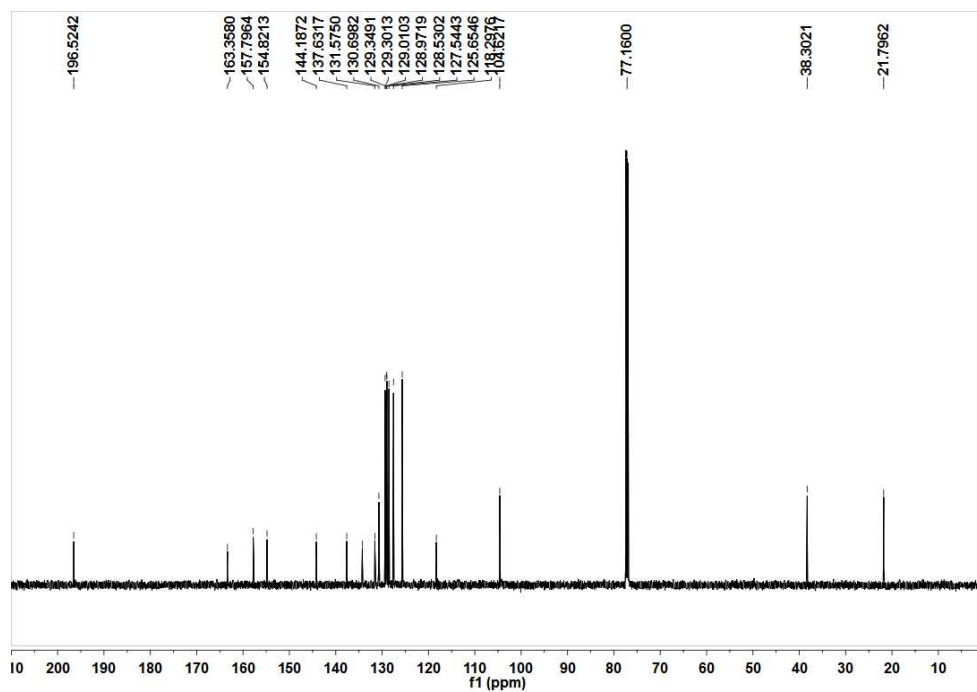

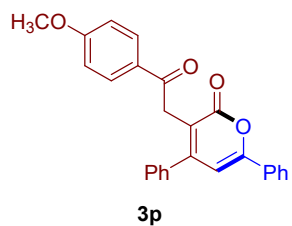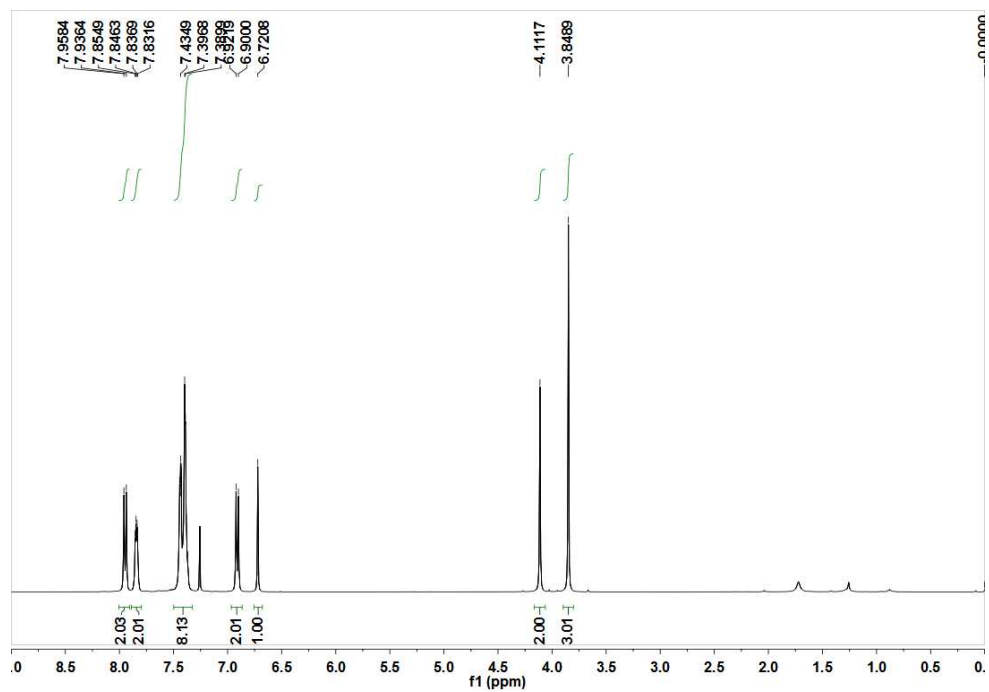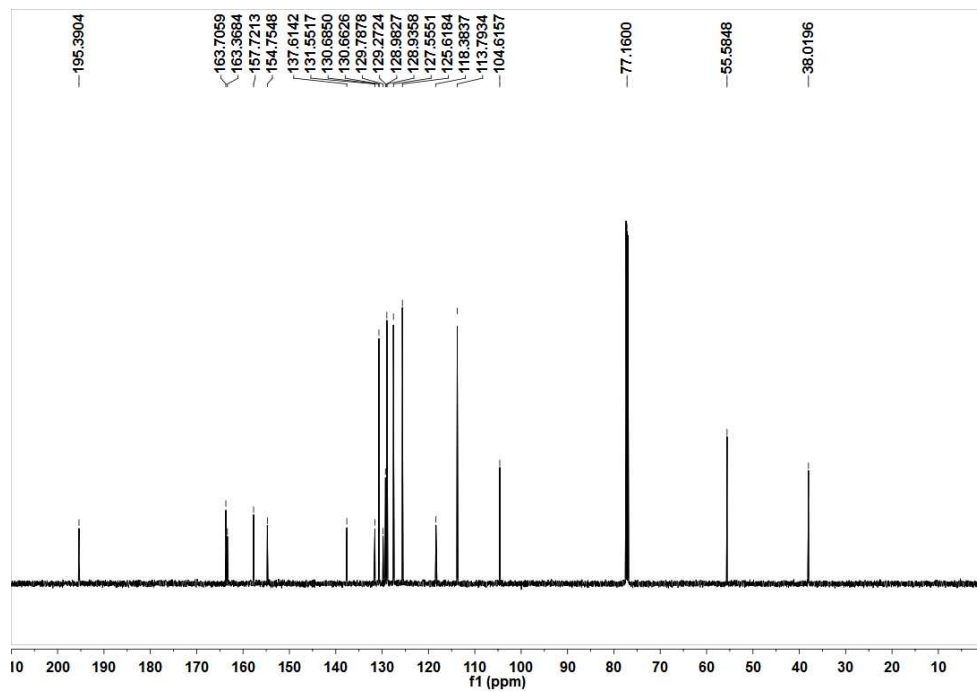

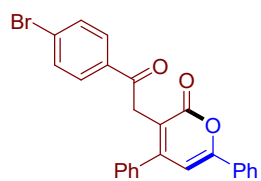

3q

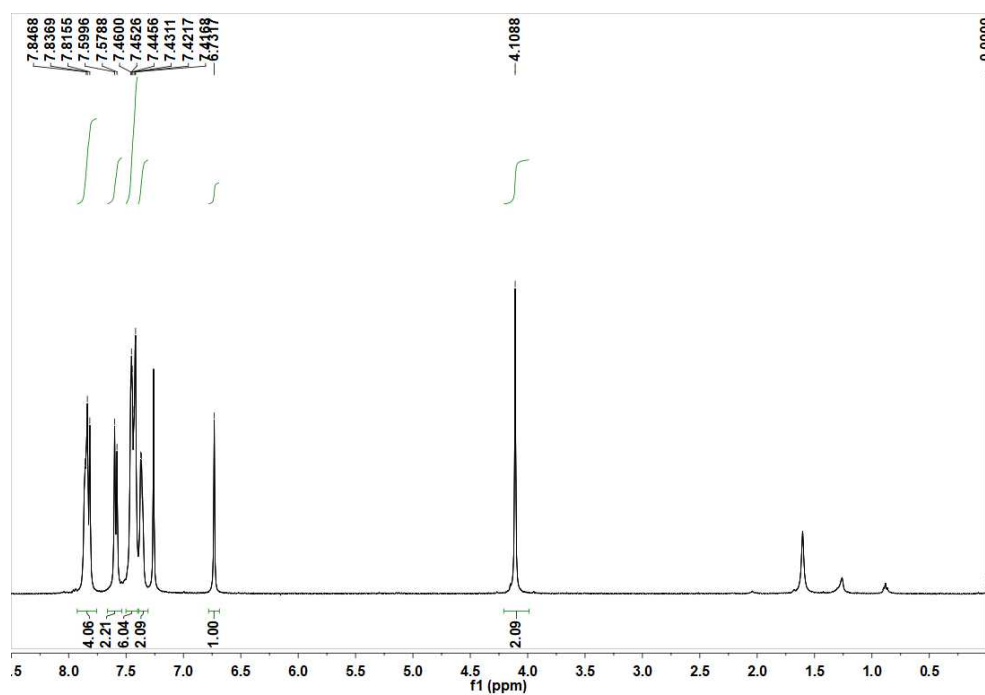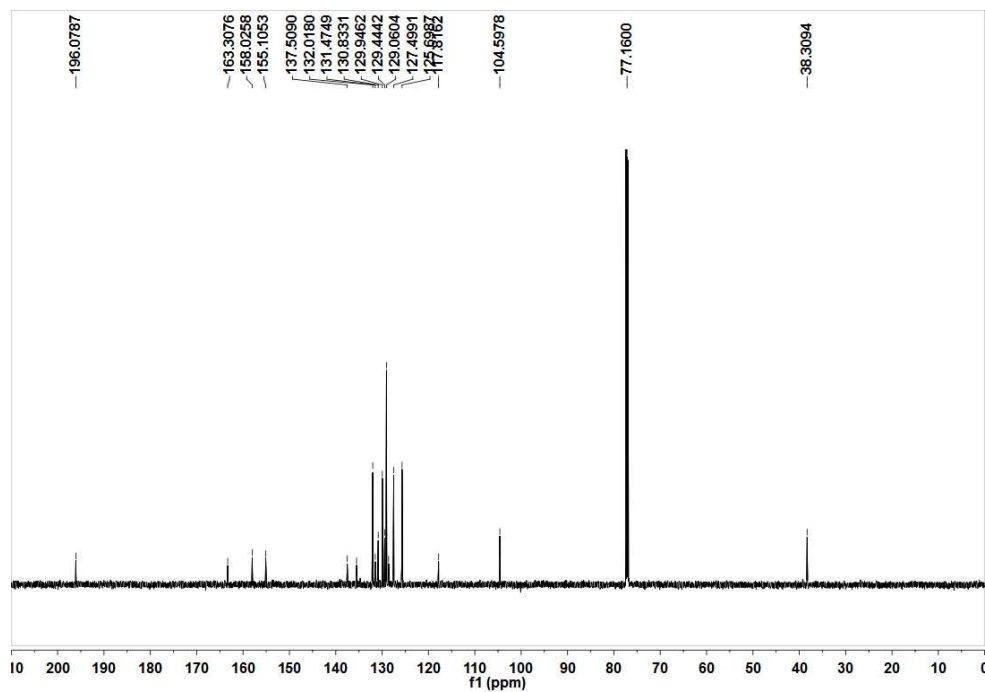

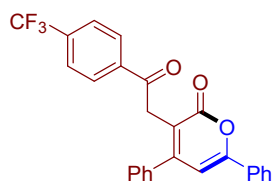

**3r**

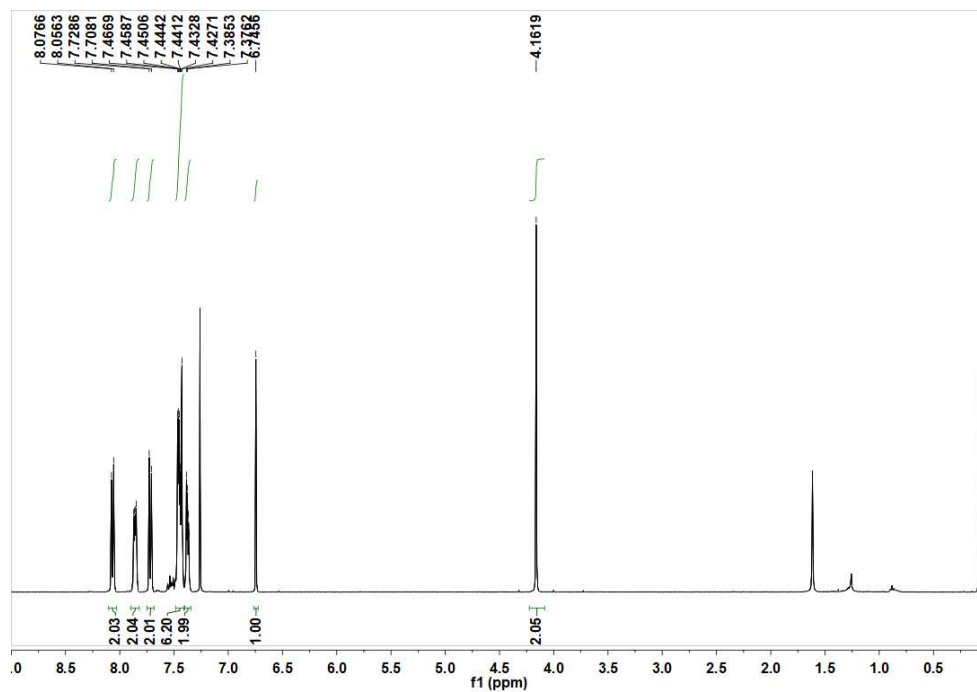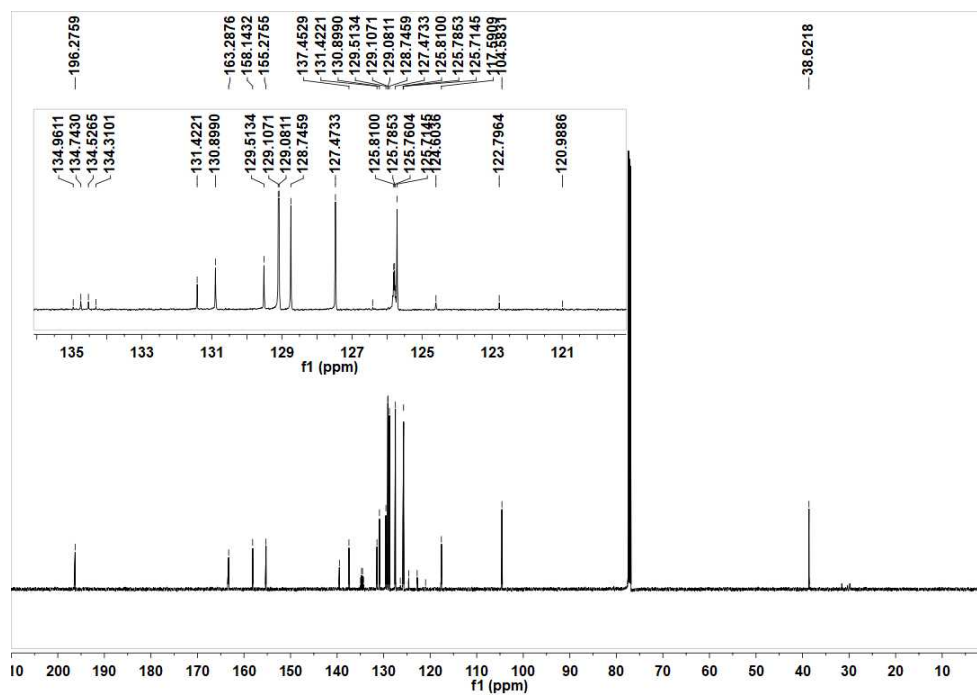



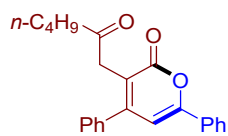

3s

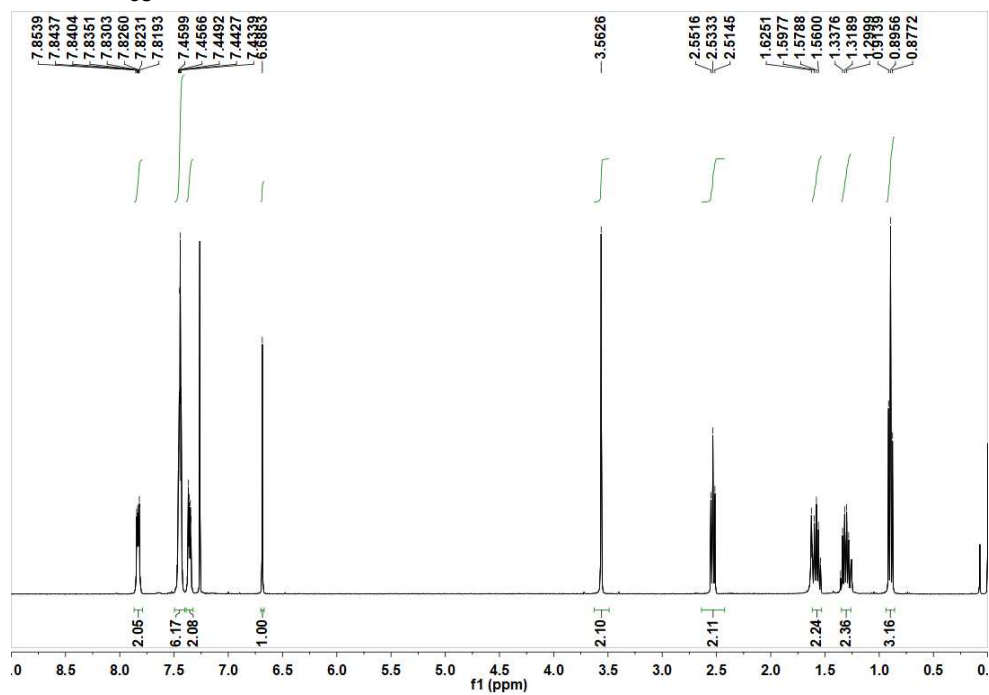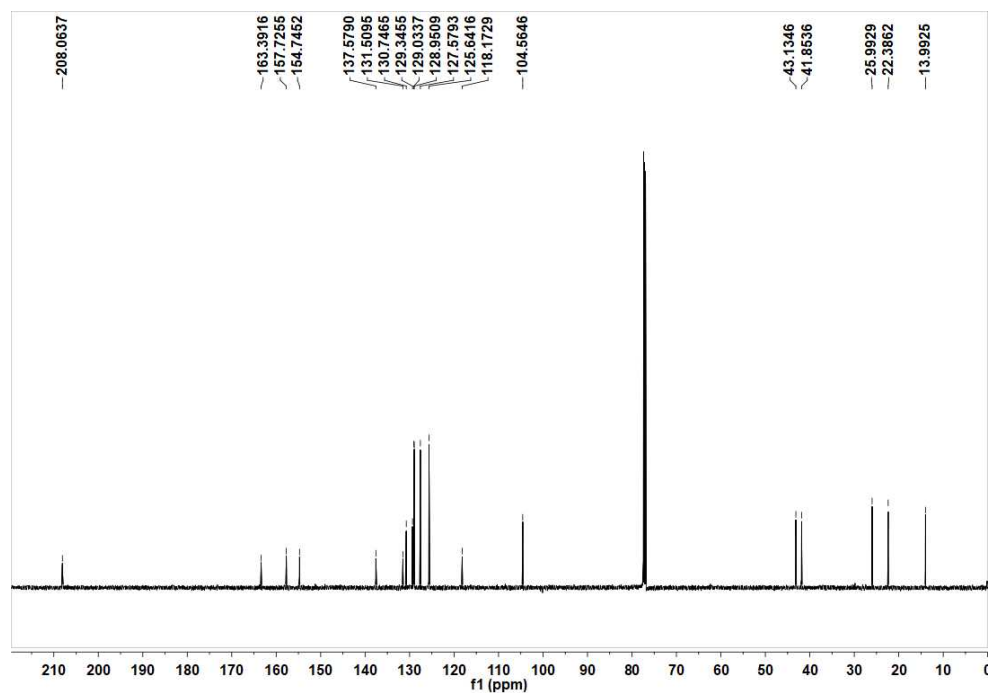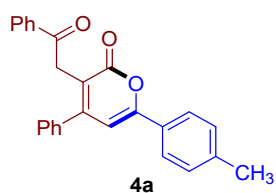

4a

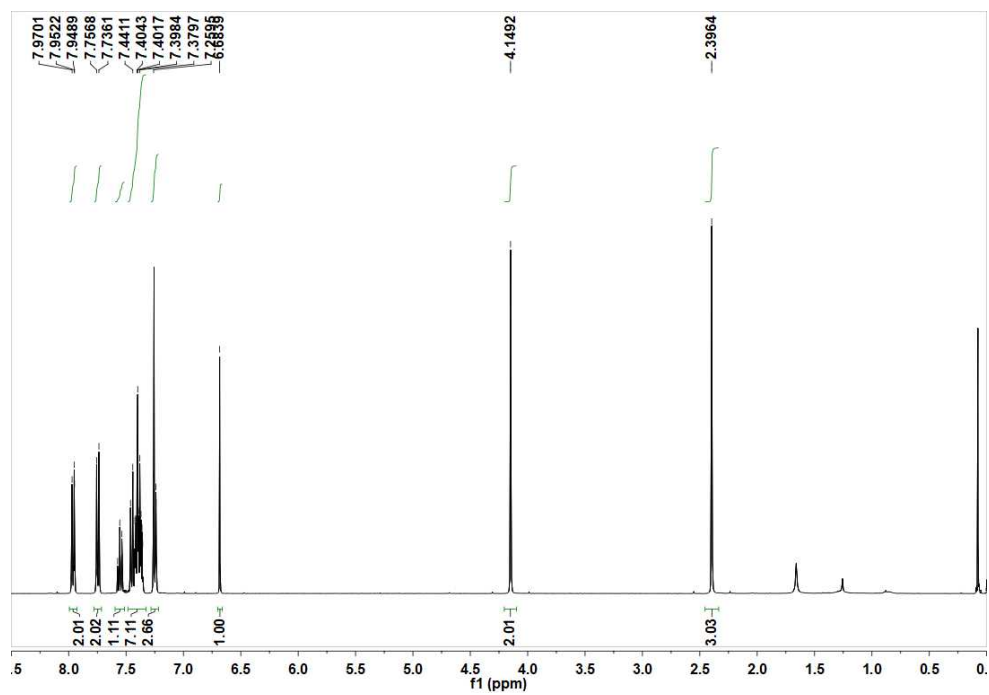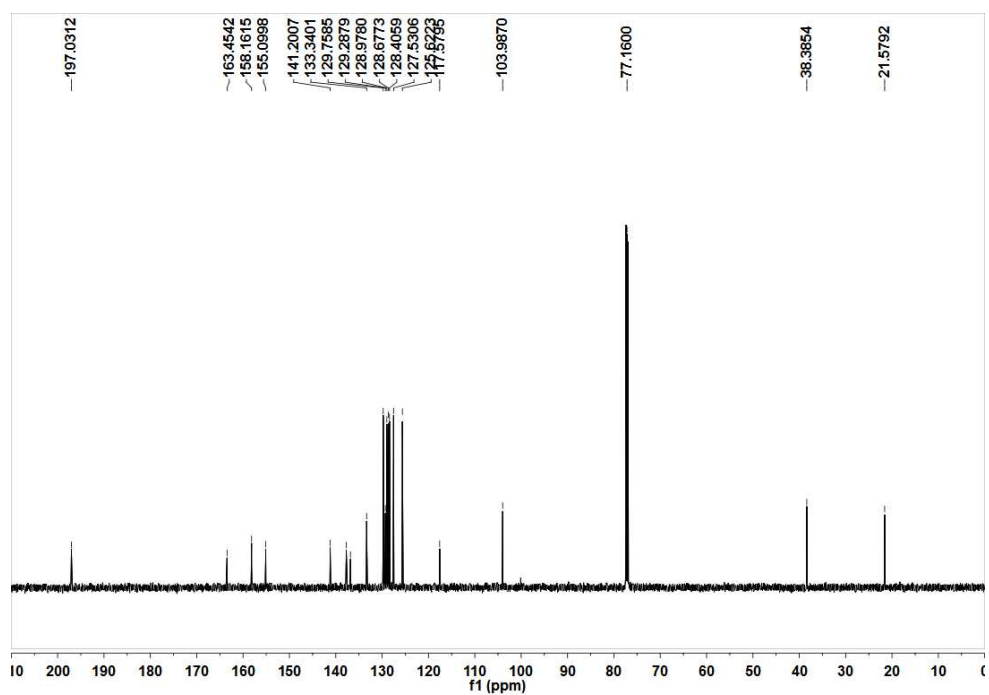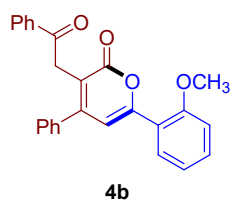

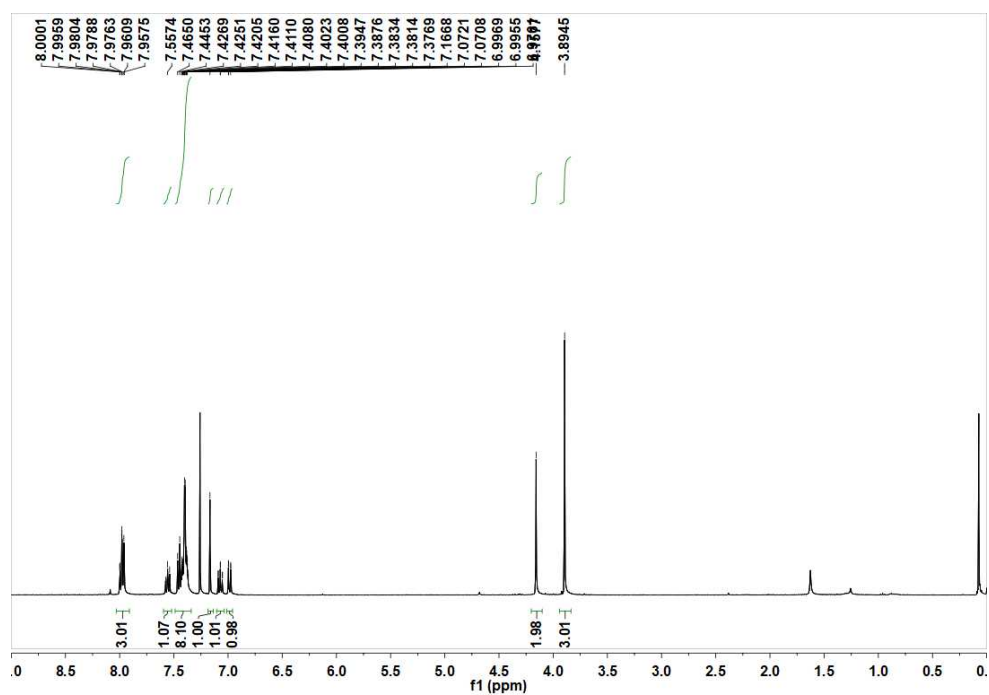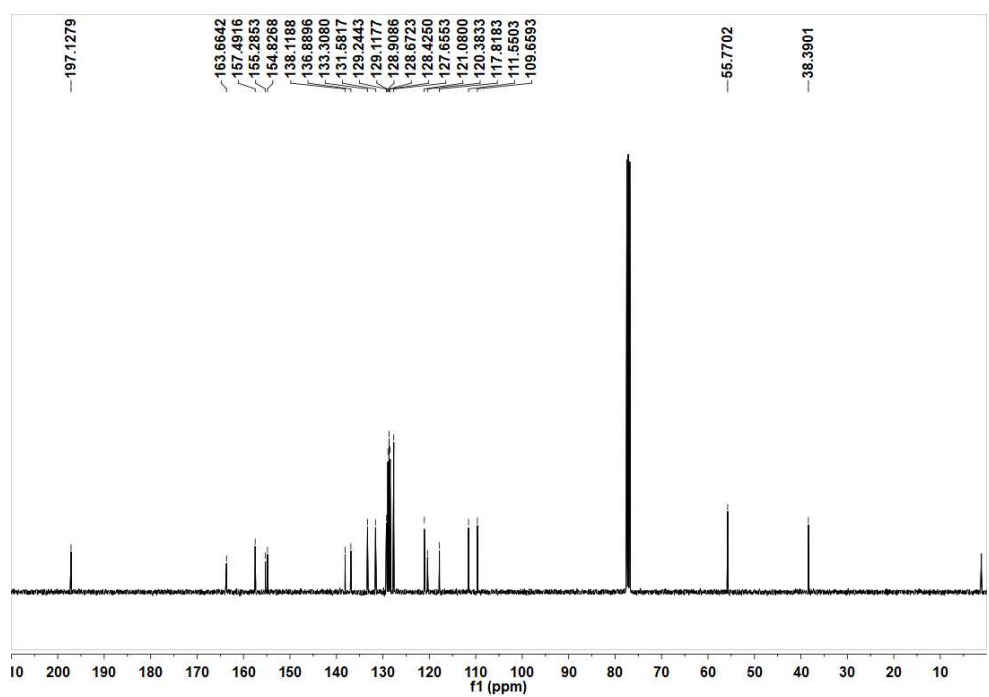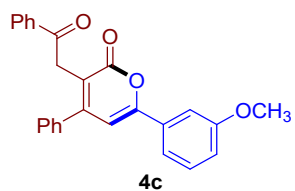

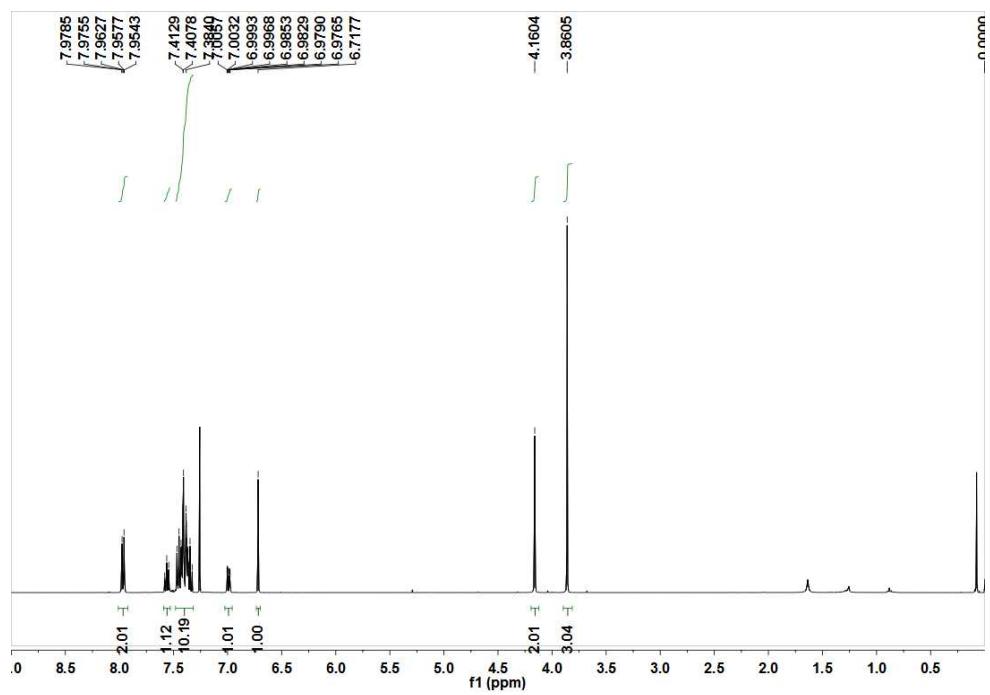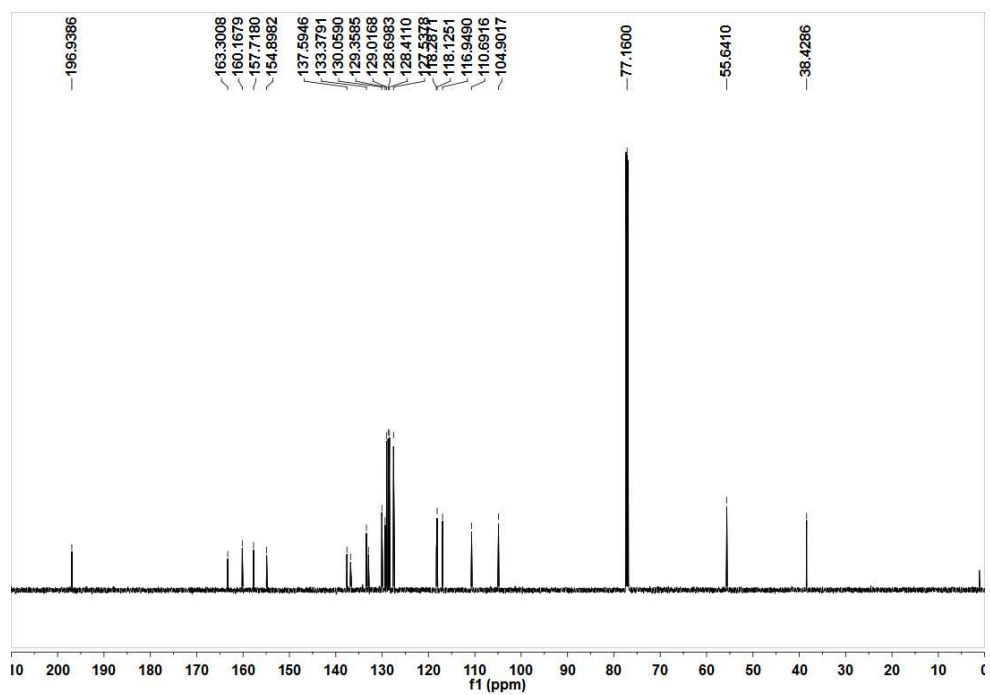

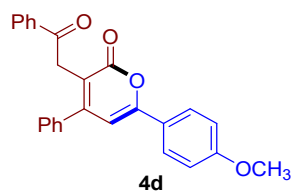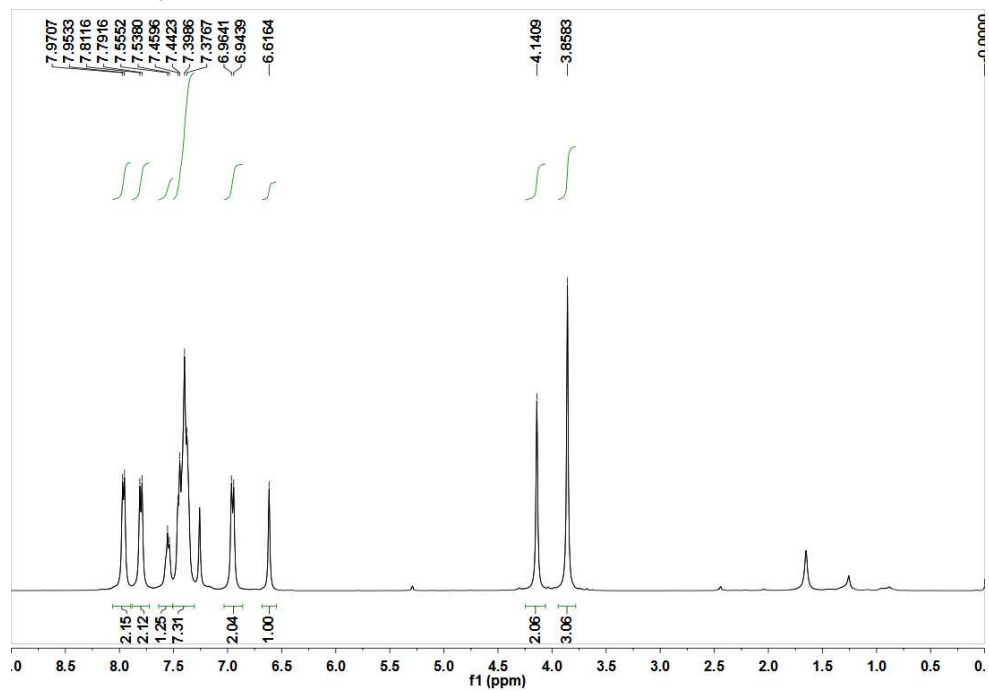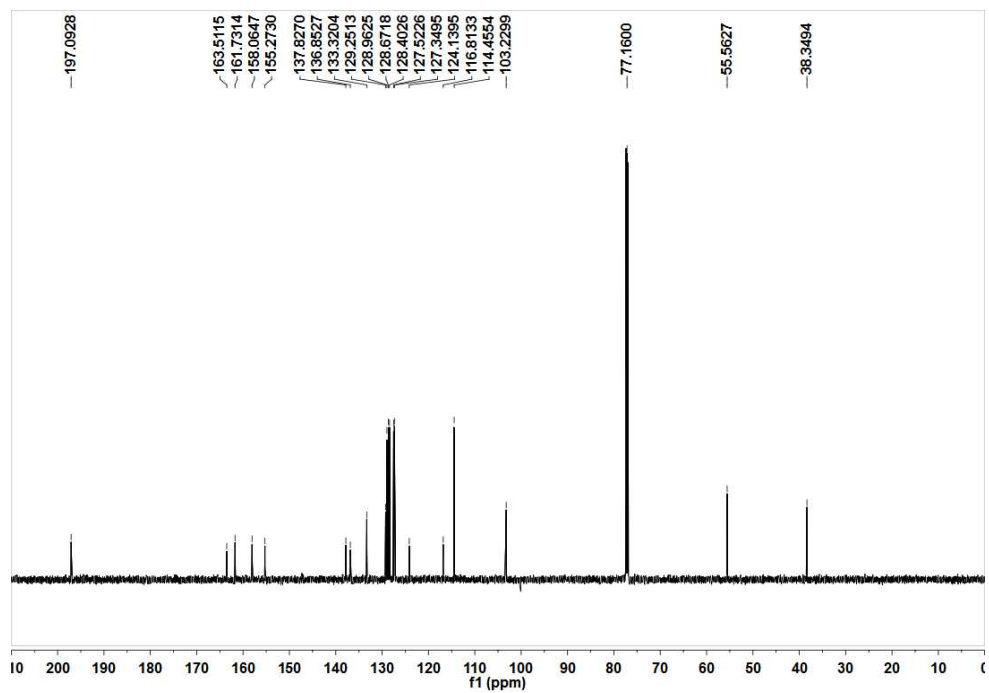

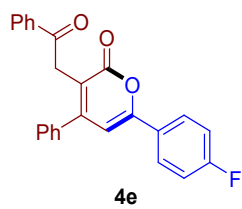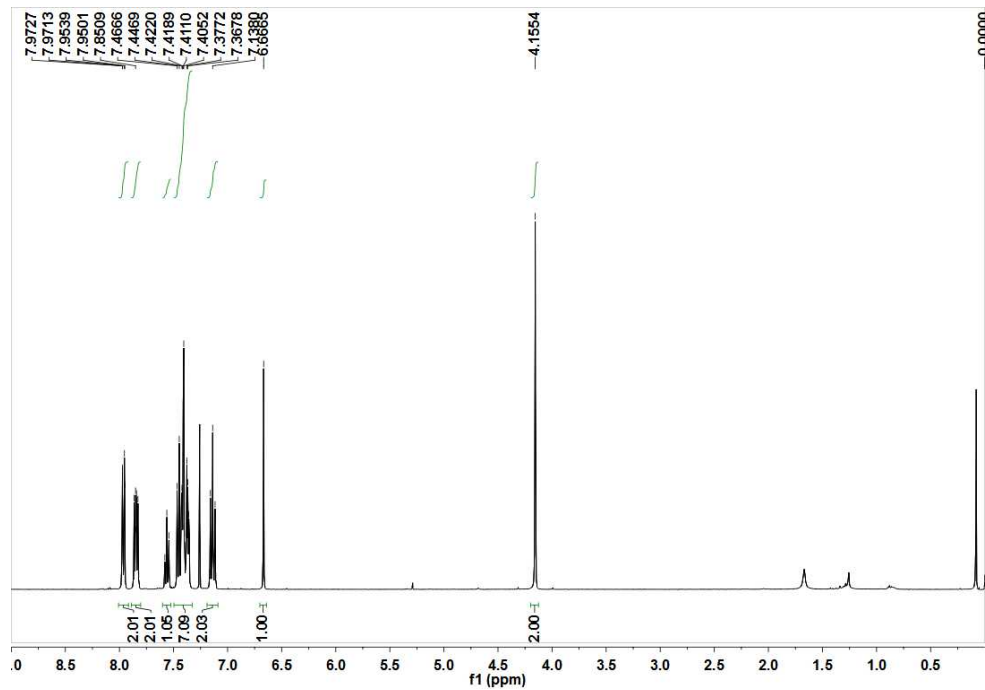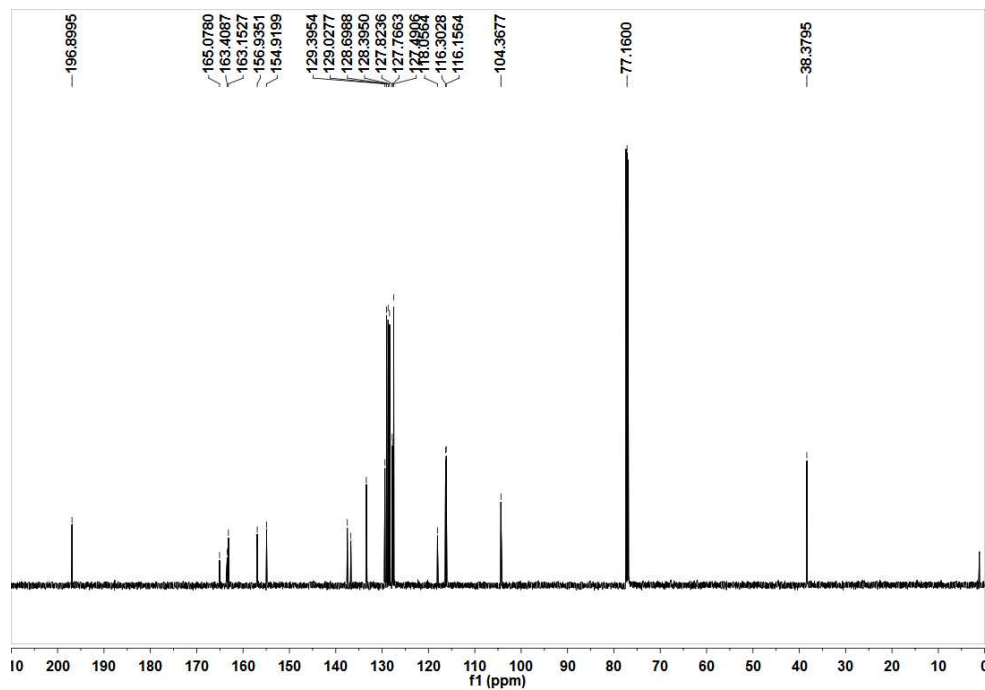

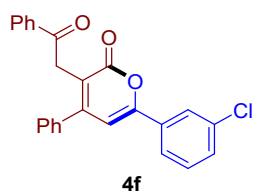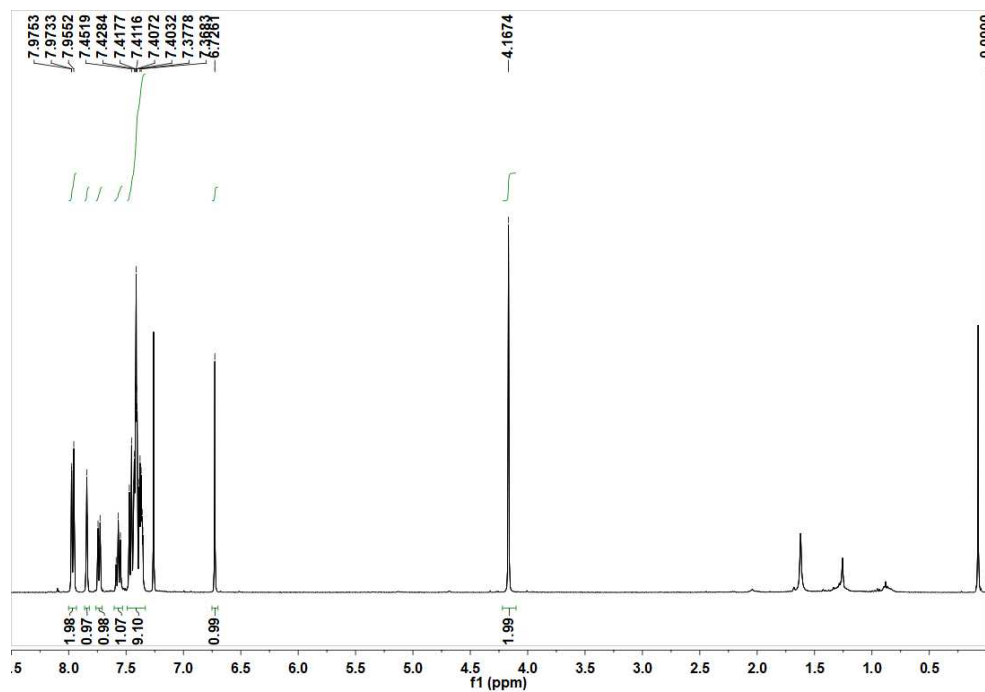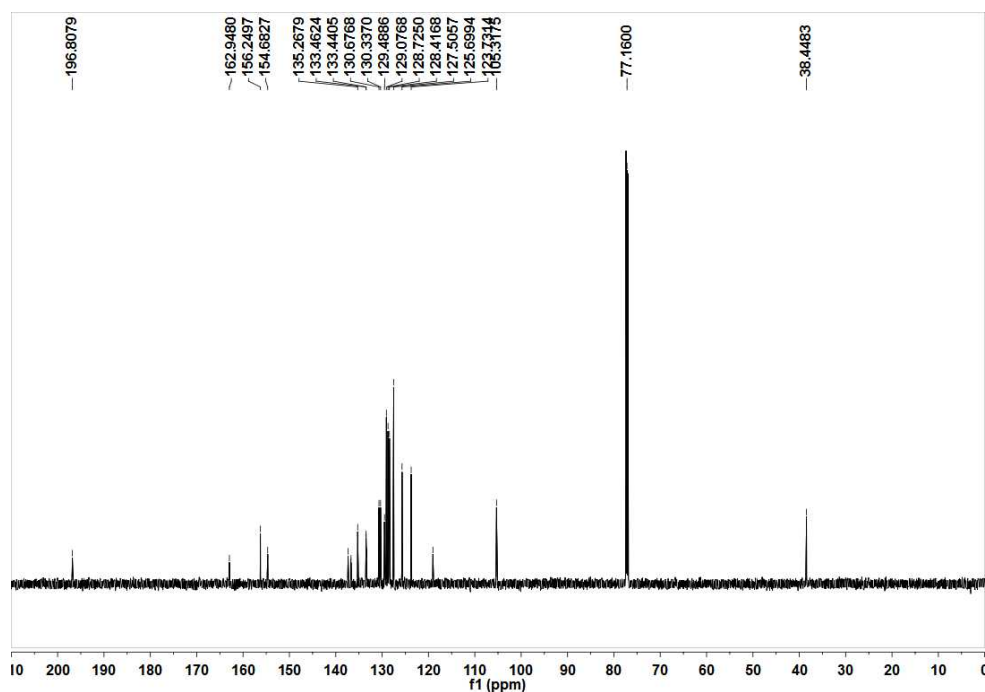

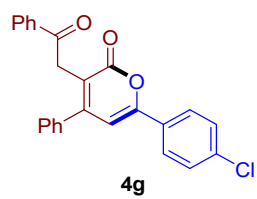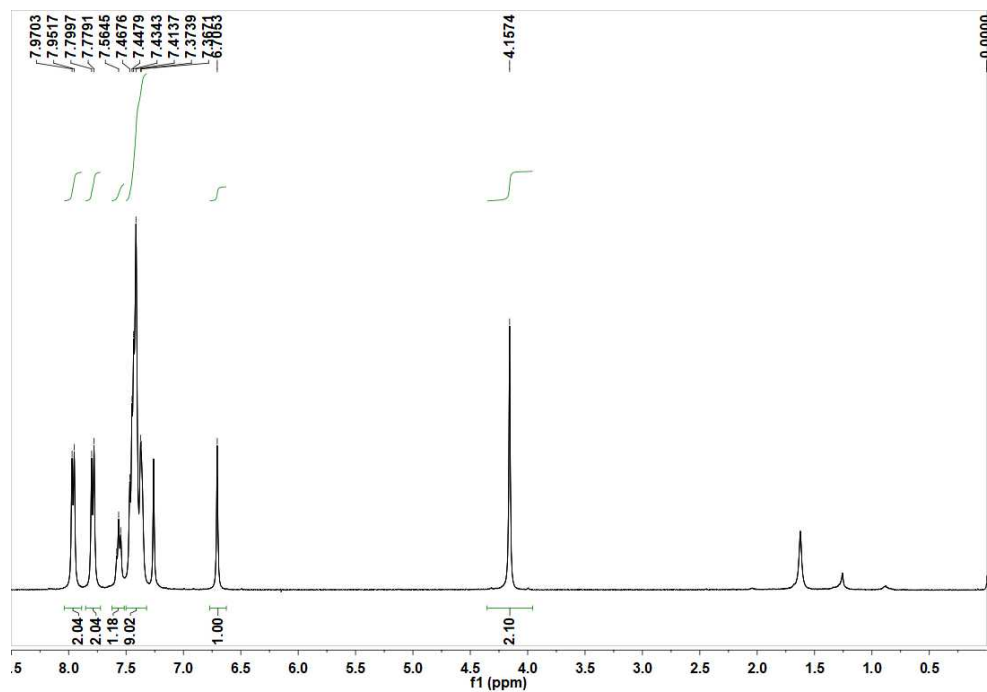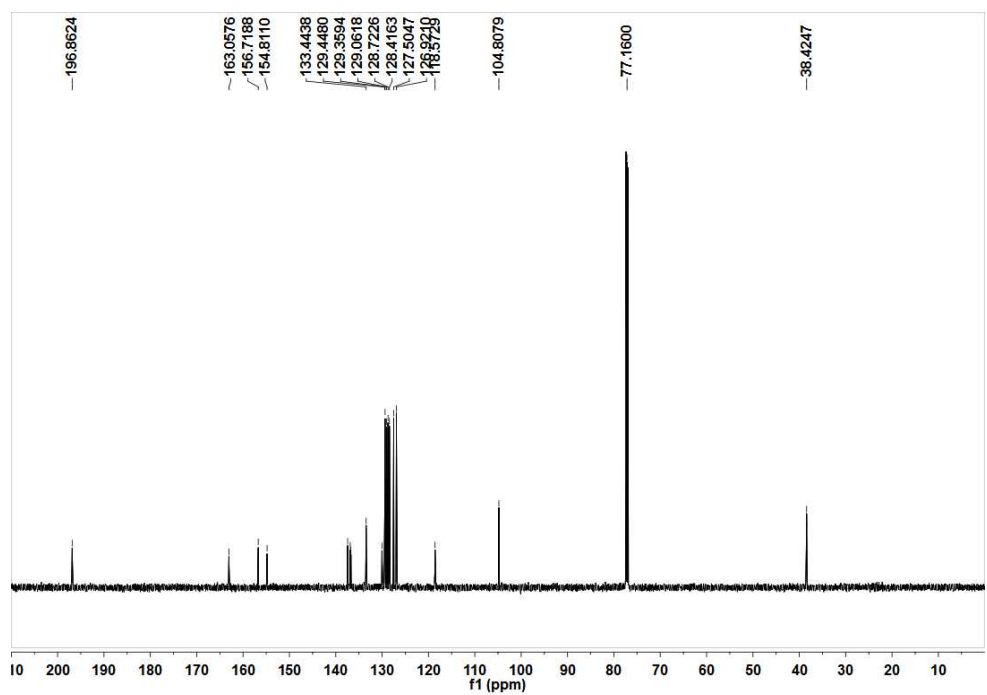



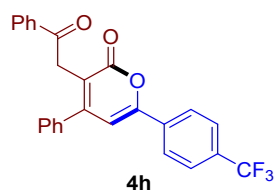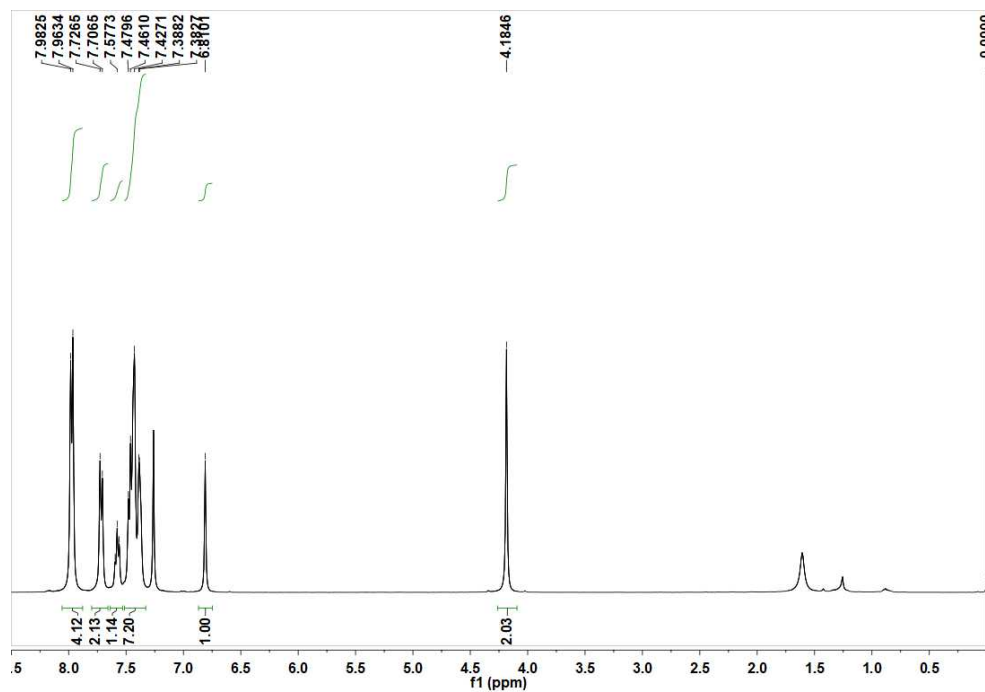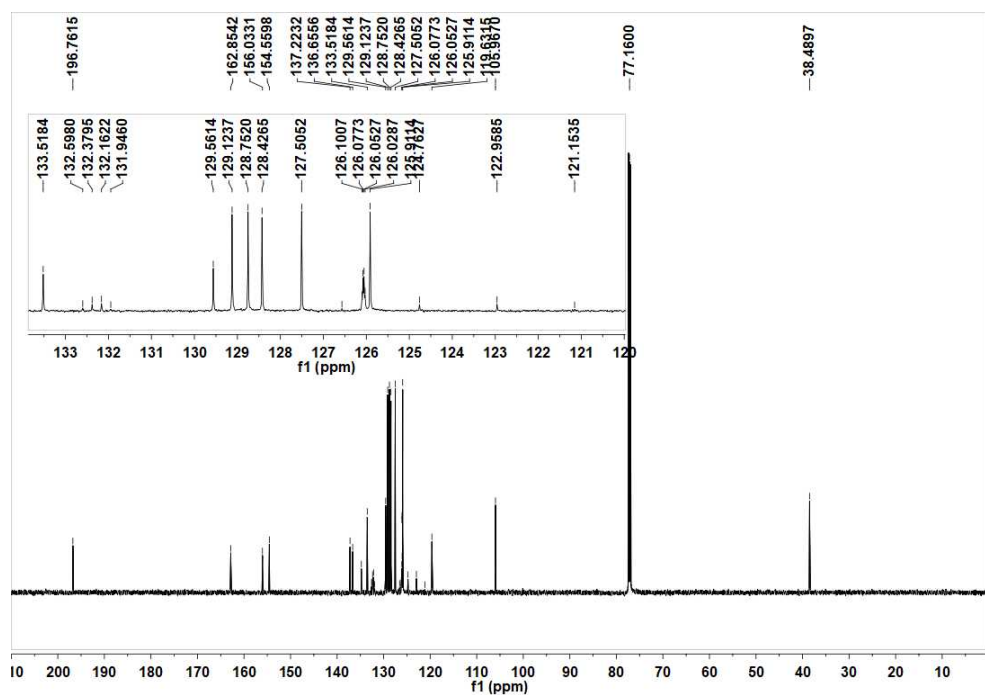

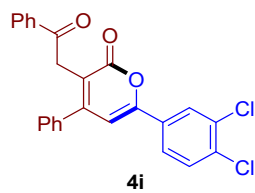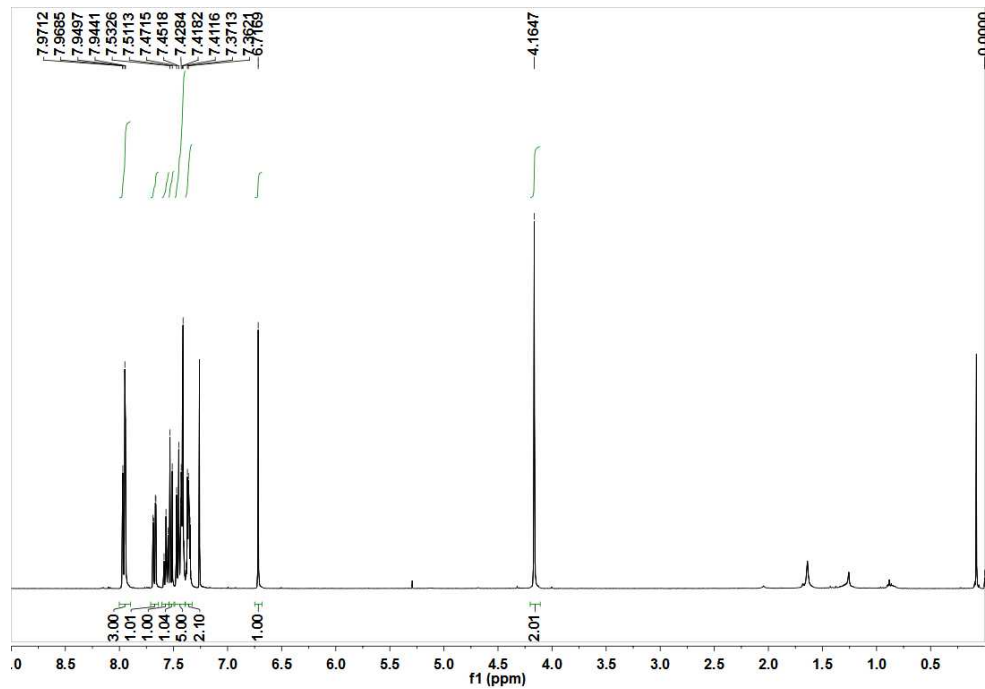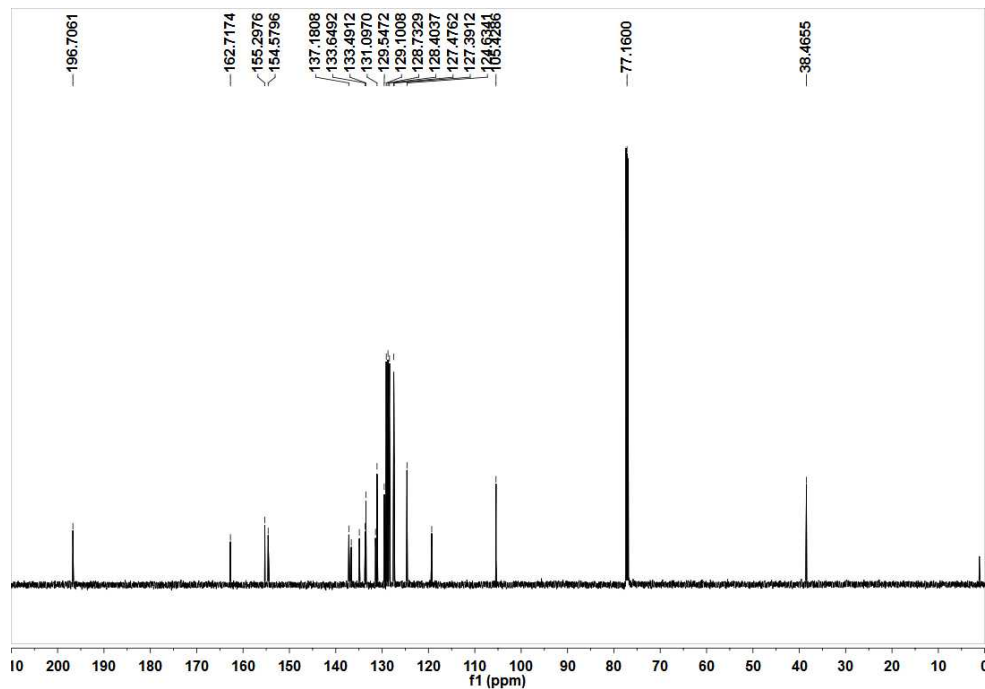

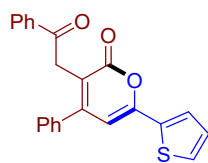

4j

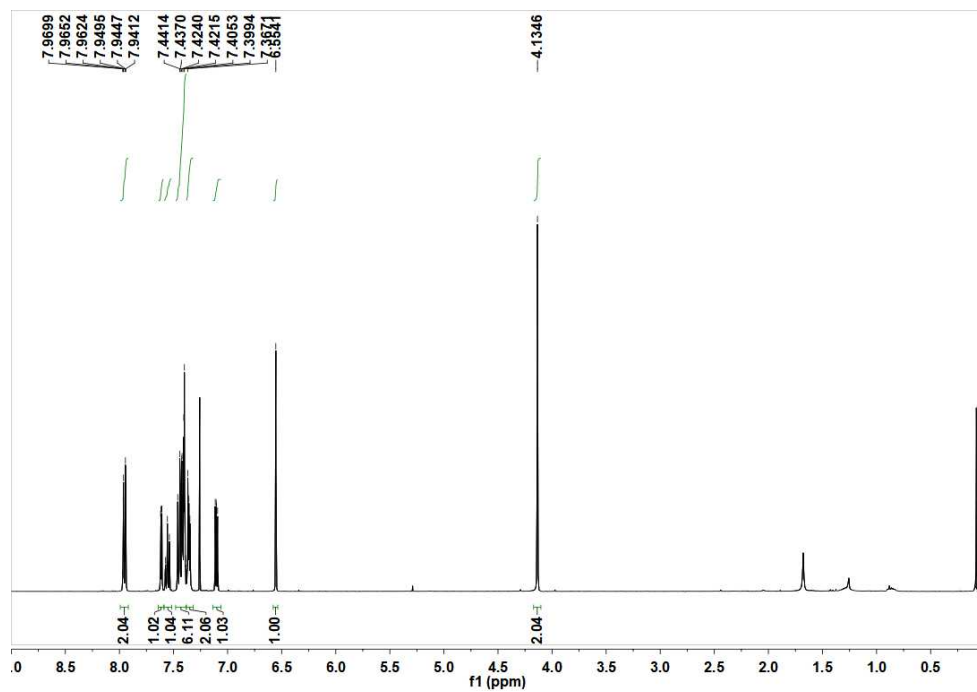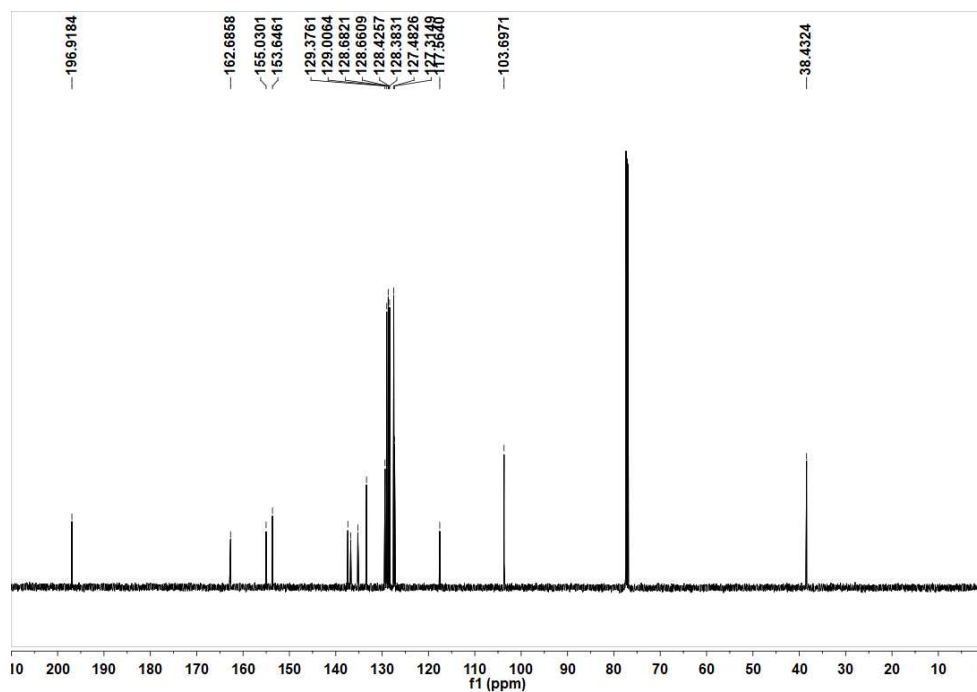

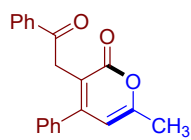

4k

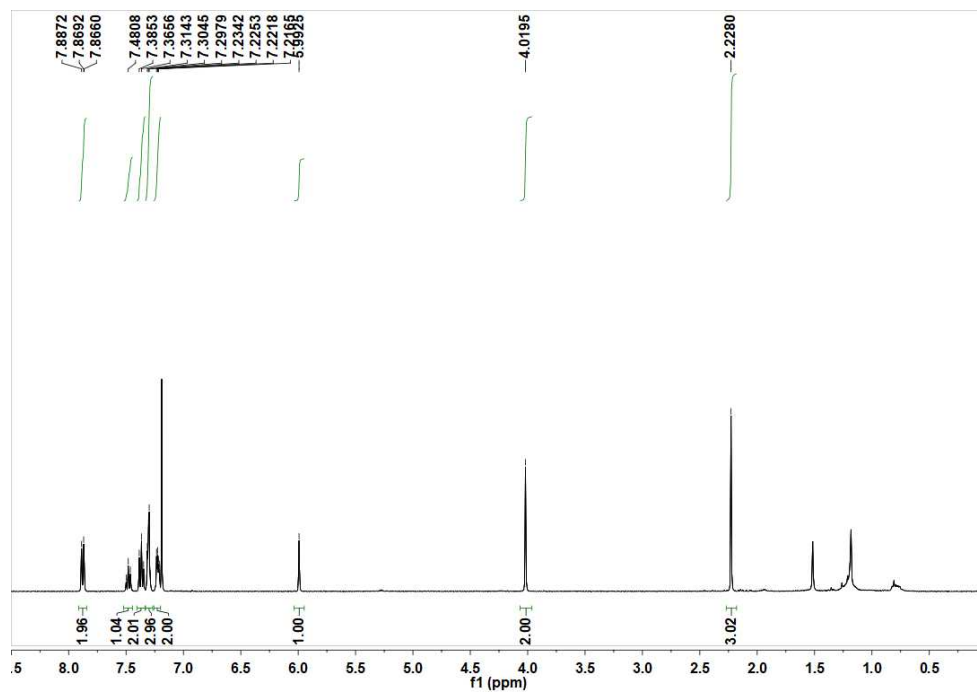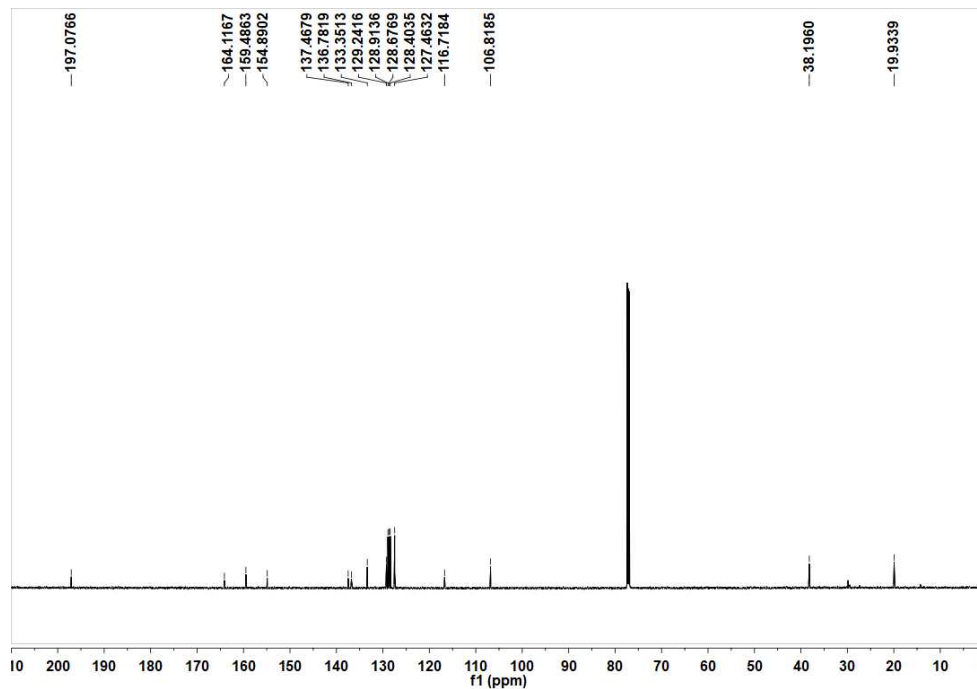

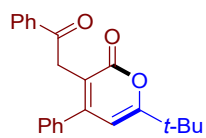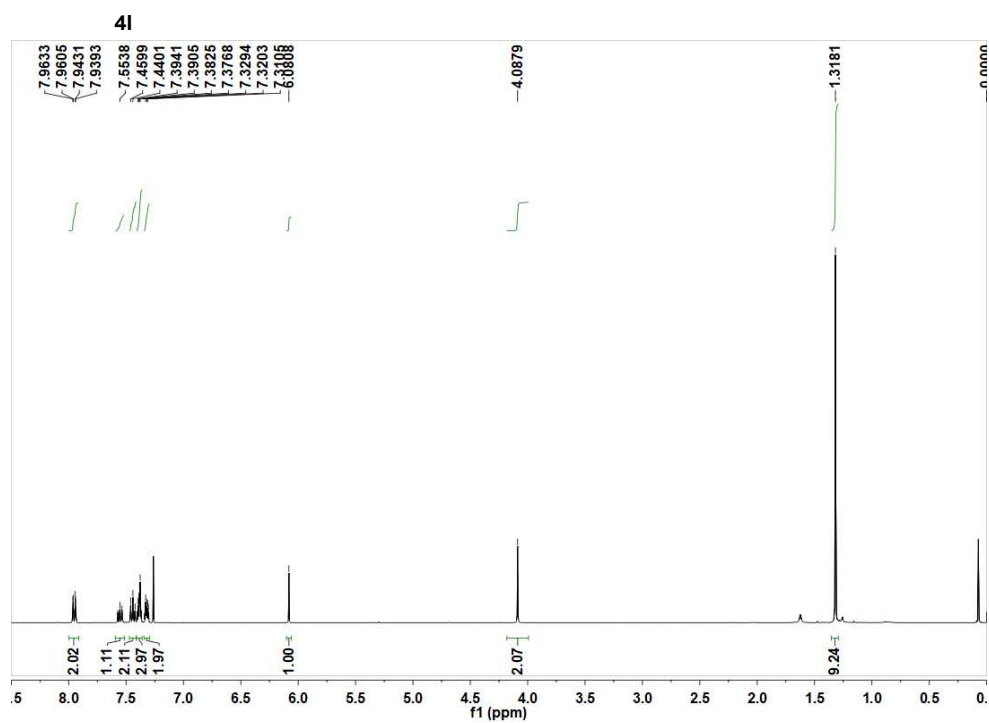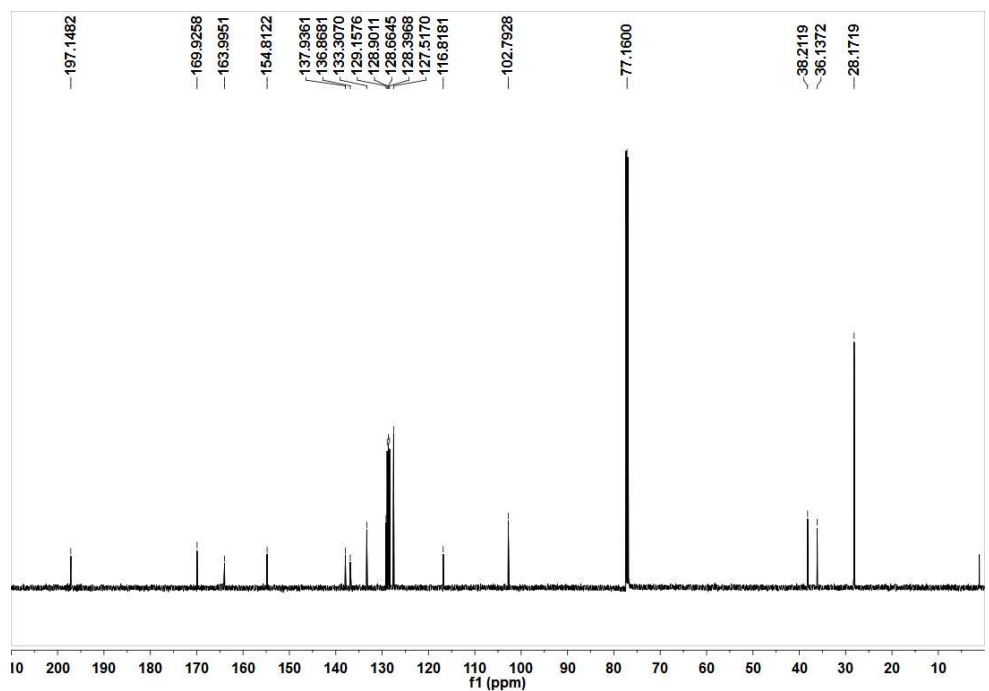

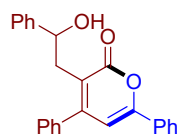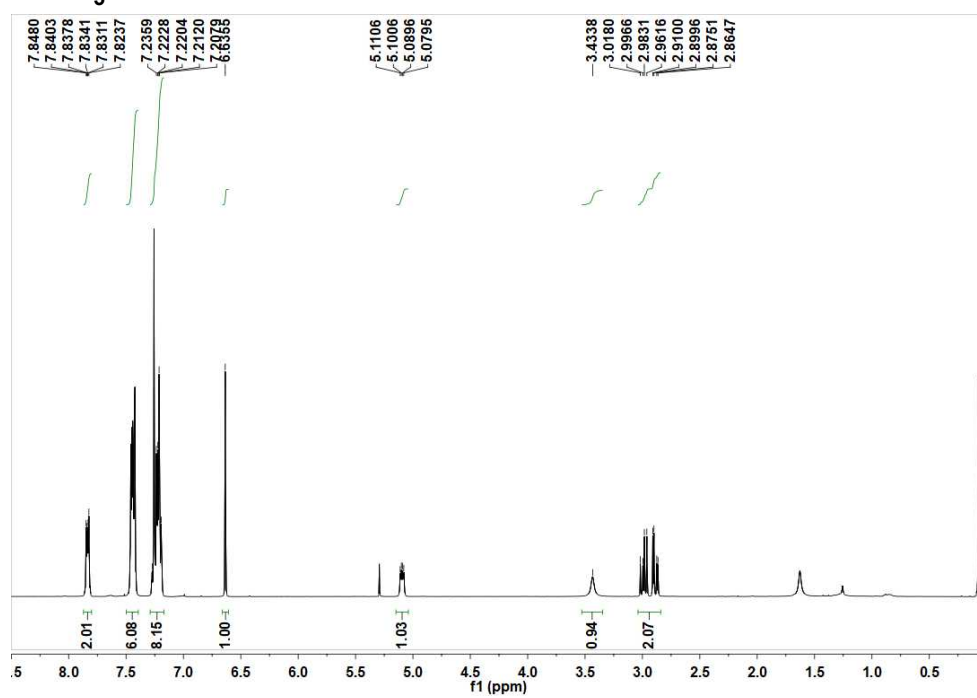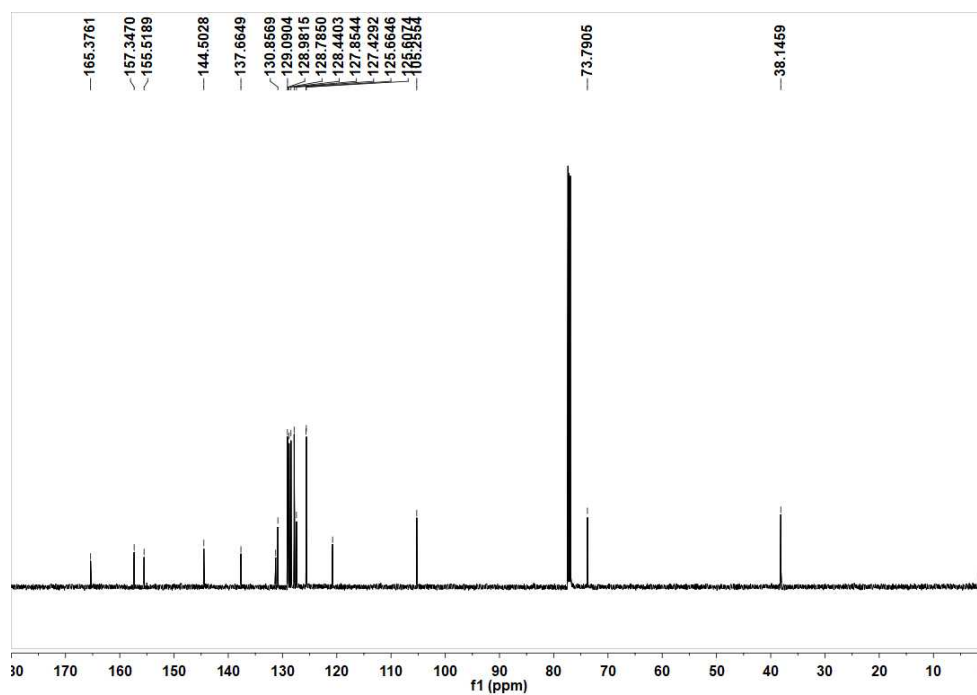

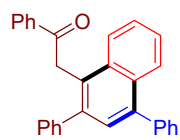

6

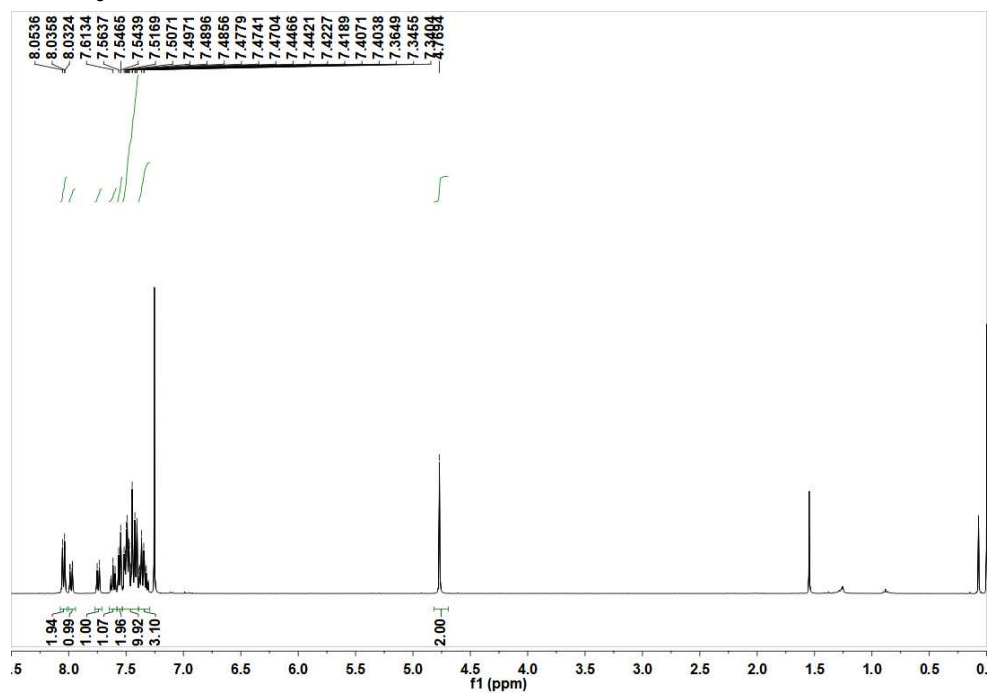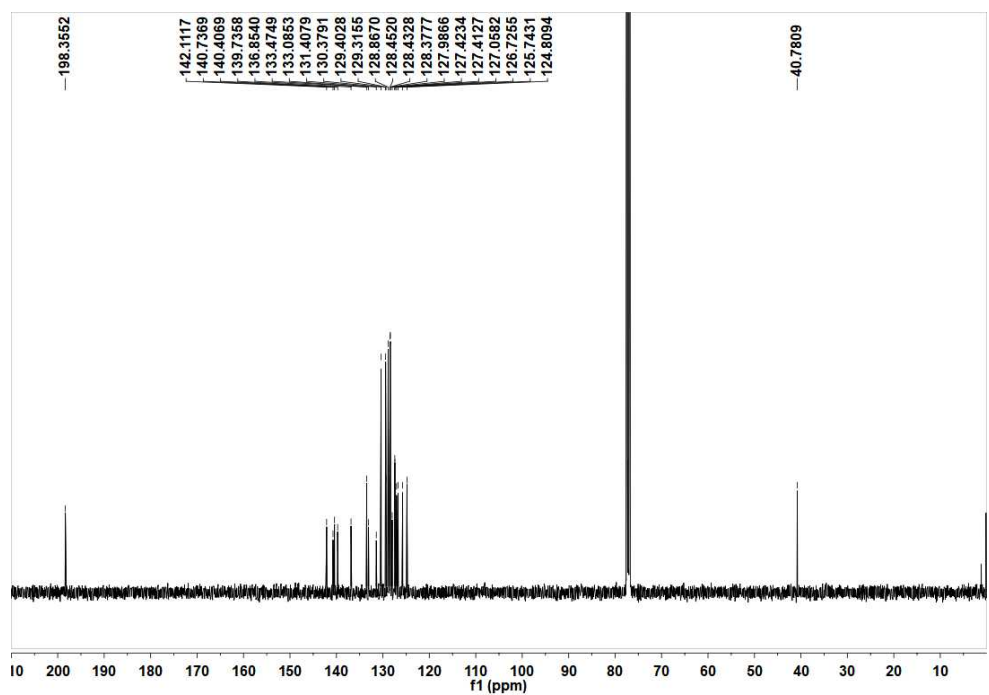

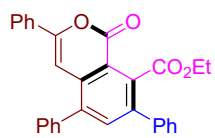

7

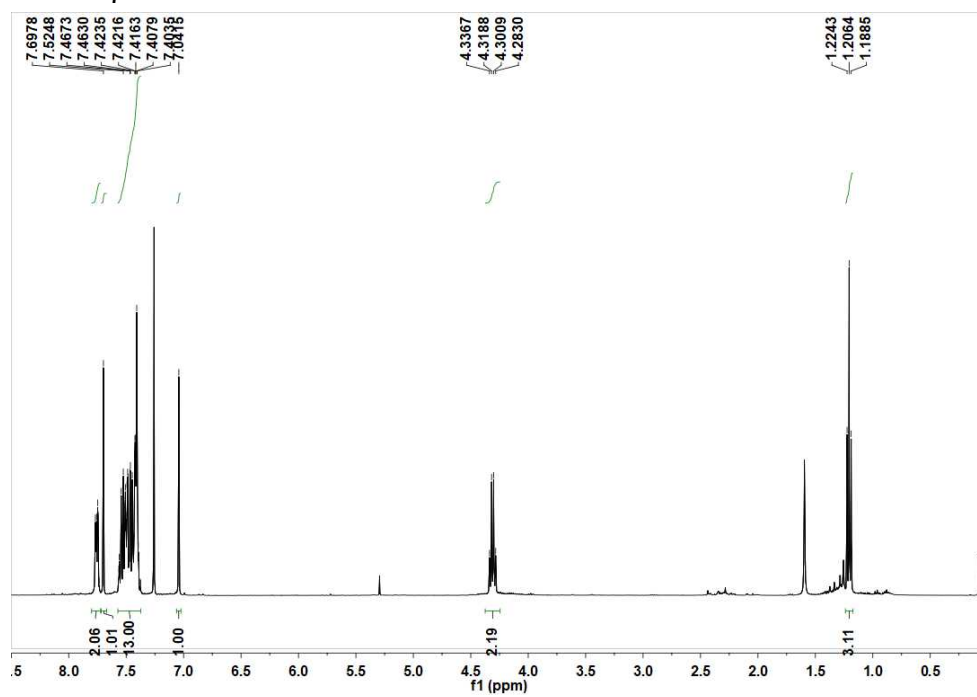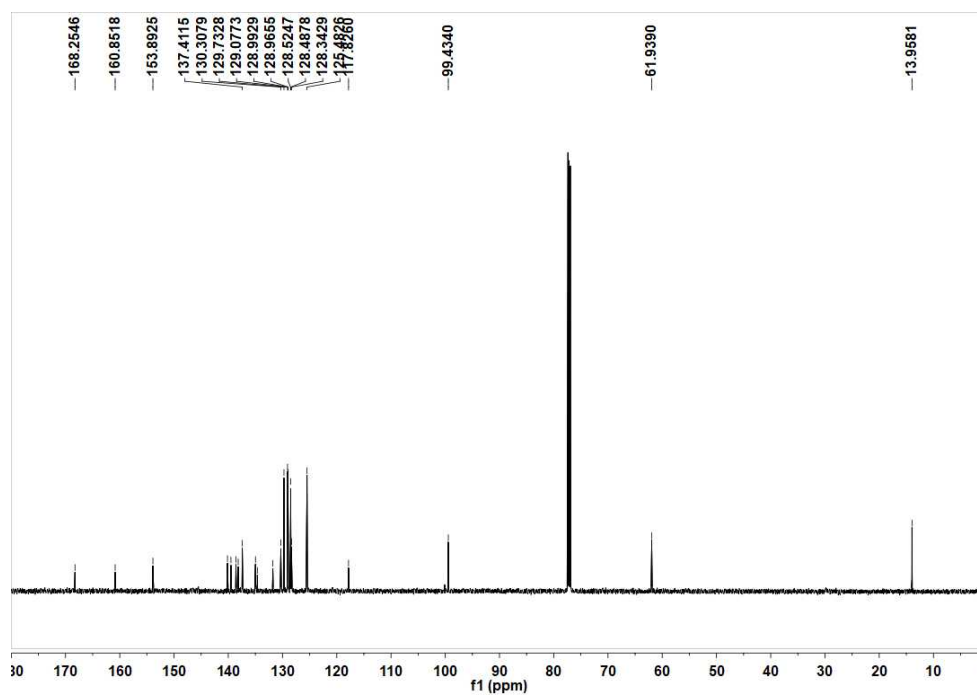



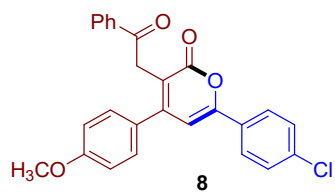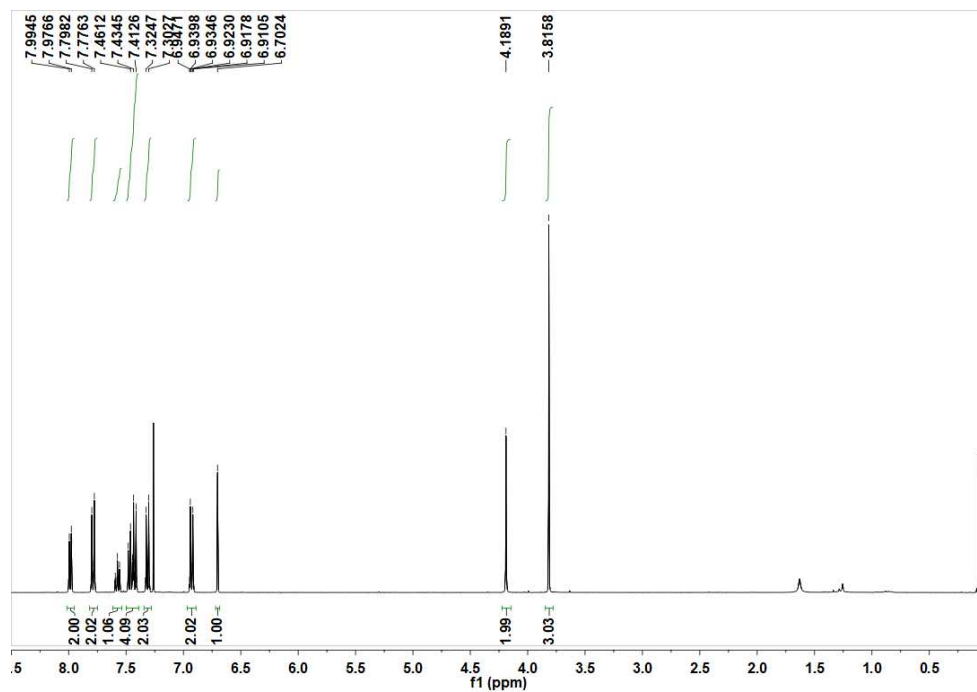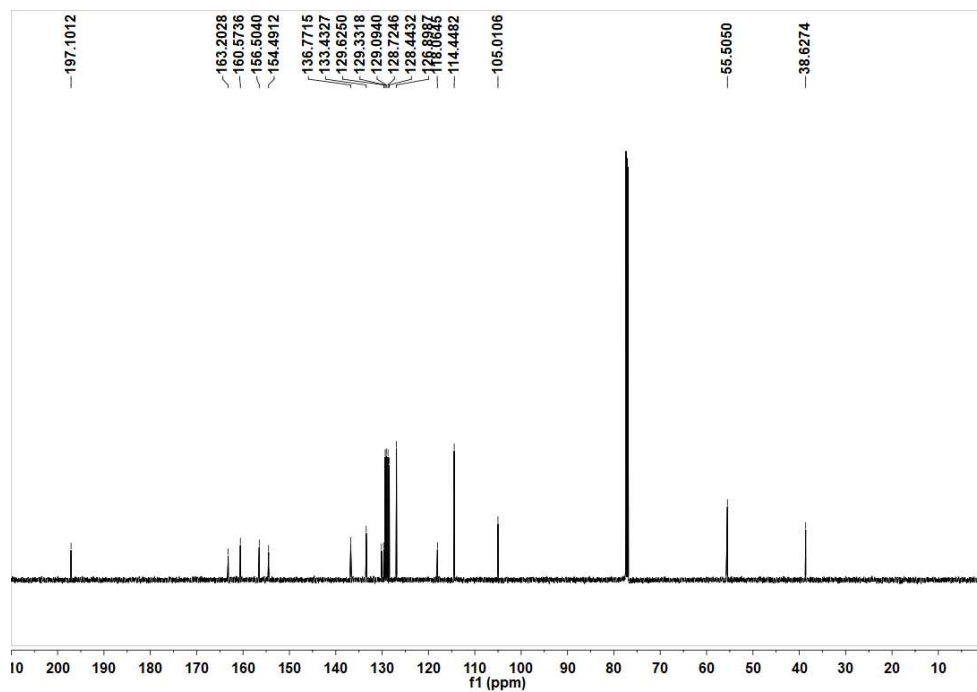

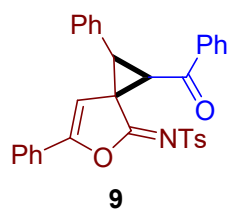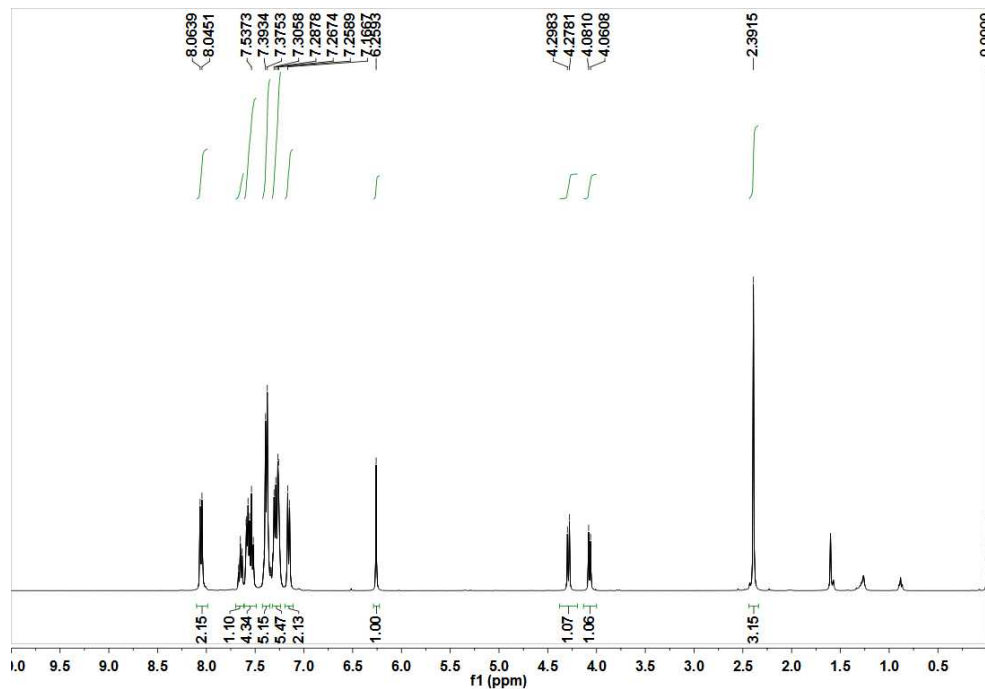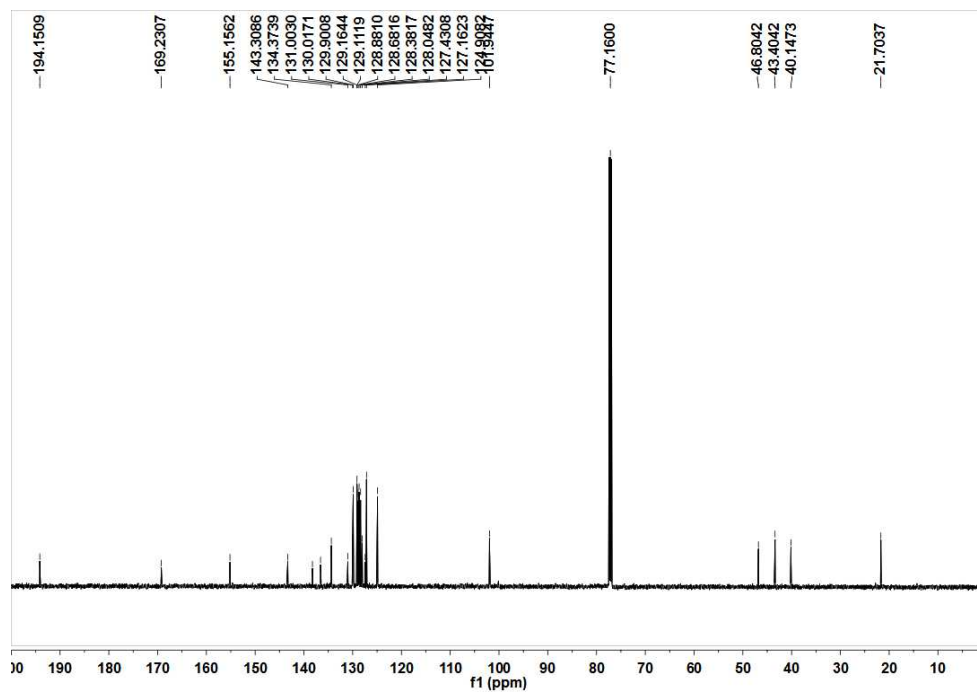

The diastereomer of 9

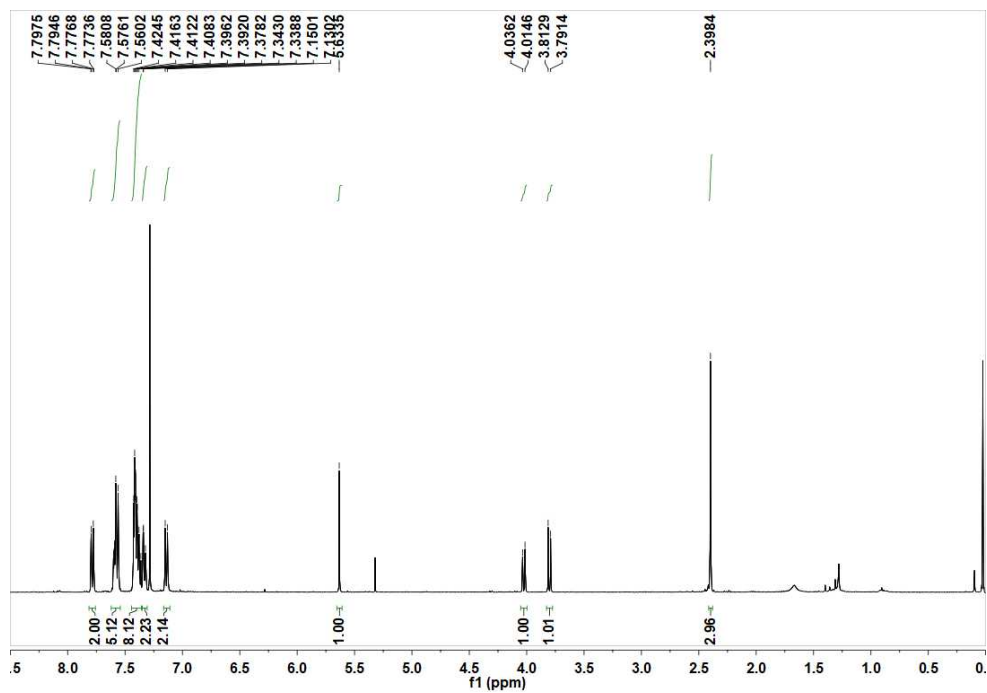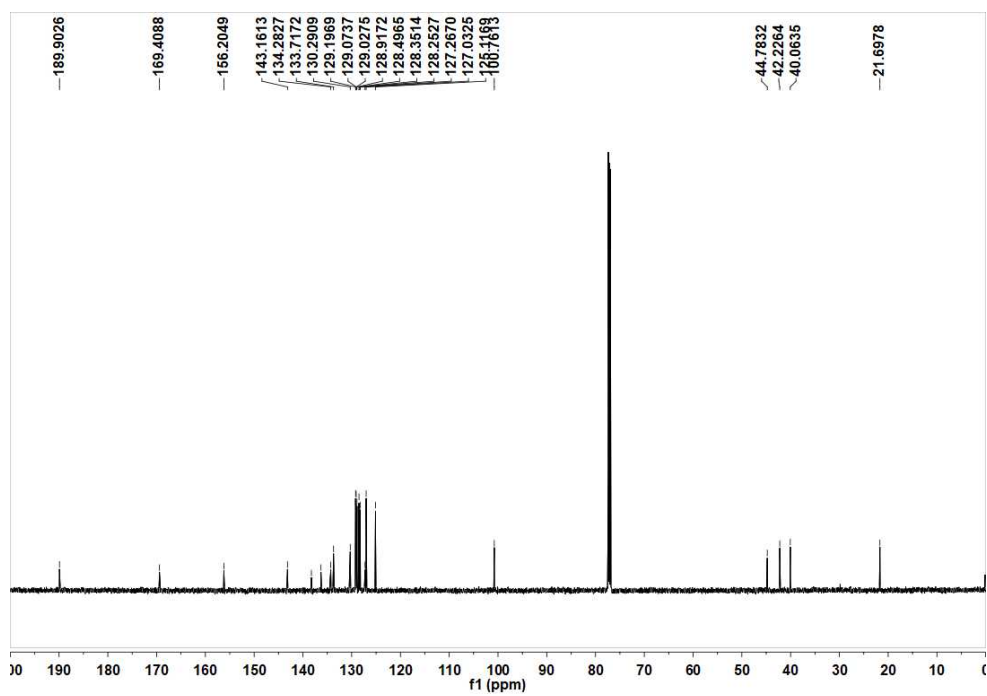

Supplement: d2qo01388f1.pdf [file d2qo01388f1.pdf]
